# Supplementary material
Source: MDPI journal article supplement (https://www.mdpi.com/1424-8247/17/5/552)
Supplement: s1 [file s1]

|  |                                                                                                    |
|--|----------------------------------------------------------------------------------------------------|
|  | <b>MYLAN GLOBAL RESPIRATORY GROUP</b>                                                              |
|  | <b>Part 1 - Physical characterisation of Kreon microspheres and its German competitor products</b> |
|  | <b>Version: 1.0</b>                                                                                |

***TABLE OF CONTENTS***

|                                           |    |
|-------------------------------------------|----|
| Table of Contents.....                    | 1  |
| Introduction .....                        | 2  |
| Equipment and Experimental procedure..... | 2  |
| Batches and Materials .....               | 3  |
| Results.....                              | 4  |
| 1.1 Sample Presentation .....             | 4  |
| 1.2 Particle Size .....                   | 6  |
| 1.3 Particle Counting.....                | 19 |
| Conclusions .....                         | 23 |
| Appendix .....                            | 24 |

**Disclaimer: Confidential, personal or proprietary information and proprietary images have been redacted from the original report.**

|  |                                           |
|--|-------------------------------------------|
|  |                                           |
|  | <b>Part 1 - Physical characterisation</b> |
|  | <b>Version: 1.0</b>                       |

## ***INTRODUCTION***

---

Creon® (Kreon) is a pancreatic enzyme replacement therapy prescribed in response to endocrine pancreatic insufficiency (EPI). This condition is typically a result of cystic fibrosis, pancreatitis, a pancreatectomy or other pancreatic function impacting conditions. The therapy replaces protease, amylase and lipase, enzymes that would otherwise be produced by a healthy pancreas.

The active ingredient in the formulation, pancreatin, is derived from healthy porcine pancreases. These are formulated into micro pellets, cylindrical in shape, approximately 1mm in diameter and 2mm in length. These pellets are enteric coated so that the enzymes are released in the duodenum. The final stage of the pellet formulation is to encapsulate them in a gelatine capsule.

Particle size analysis on the pellets of Creon® and its German competitor products was performed to compare their particle size distribution to support ongoing marketing and educational initiatives and legal disputes. In addition, scanning electron microscopy (SEM) was performed on samples from each of the batches to assess their morphology.

## ***EQUIPMENT AND EXPERIMENTAL PROCEDURE***

---

### **QICPIC Methodology**

Analysis was performed using a Sympatec QICPIC (Dynamic Image Analyser), with GRADIS Disperser and M8 lens. The QICPIC, used to collect particle size and shape data, disperses samples in a fluid stream and individual 2D particle images are captured by high speed photography. The QICPIC uses rear illumination with a visible pulsed light source that has an exposure time of 1ns to minimise motion blur.

The diameter of a circle of equal projection area (EQPC), Feret Min and Feret Max were selected for the evaluation modes. EQPC is the diameter of a circle that has the same area as the projection area of the particle. It is widely used for the evaluation of particles sizes from the projection area A of a non-spherical particle. Feret Diameter is defined as the distance between two parallel tangents of the particle at an arbitrary angle. The Feret diameters for a sufficient number of angles are calculated, and for Feret Max the maximum angle is selected and for Feret Min the minimum angle is selected.

If a particle has an irregular shape, the Feret diameter varies more than with regularly shaped particles. The Feret Min diameter is always smaller, and the Feret Max diameter is always larger, than the diameter of the equivalent circle (EQPC).

### **SEM Methodology**

Samples were mounted on samples stubs (G301P, Agar Scientific) using 12mm carbon tabs (G3347N, 170301, Agar Scientific). The mounted samples were gold coated (5nm layer) using Quorum Q150RS sputter coater. Depending on the sample, accelerating voltages between 5 and 15 kV were used to achieve optimal surface detail. Auto-focus and auto-contrast will be performed prior to the collection of each image, with manual optimisation performed as required. Images were collected at magnifications x37 – x350.

|  |                                           |
|--|-------------------------------------------|
|  |                                           |
|  | <b>Part 1 - Physical characterisation</b> |
|  | <b>Version: 1.0</b>                       |

Analysis was performed using Hitachi FlexSEM (Scanning Electron Microscope) and Quorum sputter coater.

## ***BATCHES AND MATERIALS***

The following batches were analysed:

| Supplier                  | Material           | Batch  | Strength |
|---------------------------|--------------------|--------|----------|
| Abbott Laboratories GmbH  | Kreon              | 59042  | 5k       |
|                           |                    | 57797  | 10K      |
|                           |                    | 58519  | 10K      |
|                           |                    | 57234  | 10K      |
|                           |                    | 58845  | 20K      |
|                           |                    | 58259  | 25K      |
|                           |                    | 58888  | 25K      |
|                           |                    | 57467  | 25K      |
|                           |                    | 59016  | 35K      |
| Allergan                  | Panzytrat          | 337801 | 10K      |
|                           |                    | 358001 | 20K      |
|                           |                    | 412801 | 25K      |
|                           |                    | 413201 | 25K      |
|                           |                    | 670501 | 40K      |
| Berlin-Chemie AG          | Pangrol            | 83147D | 10K      |
|                           |                    | 94166E | 10K      |
|                           |                    | 92027A | 20K      |
|                           |                    | 84231E | 25K      |
|                           |                    | 93255H | 25K      |
|                           |                    | 92019  | 40K      |
| Berlin-Chemie AG          | Mezym              | 98013  | 10K      |
| Nordmark                  | PANKREAT.STADA ALI | 92238  | 20K      |
|                           | PANKREATAN (G-O)   | 321301 | 10K      |
|                           |                    | 501201 | 20K      |
|                           |                    | 323101 | 25K      |
|                           | PANKREATIN LVS     | 012501 | 10K      |
|                           |                    | 319301 | 20K      |
|                           | PANKREATIN         | 672401 | 40K      |
| Ratiopharm                | PANKREAT MIKRO     | 321401 | 20K      |
| Trommsdorff GmbH & Co. KG | OZYM               | N001   | 20K      |
|                           |                    | N002   | 40K      |
| UCB                       | COTAZYM            | 507401 | 20K      |
|                           |                    | 507701 | 30K      |
|                           |                    | 659101 | 40K      |

\*Batches are in tablet form, imaged using light microscope and particle size measured using digital callipers.

|  |                                           |
|--|-------------------------------------------|
|  |                                           |
|  | <b>Part 1 - Physical characterisation</b> |
|  | <b>Version: 1.0</b>                       |

## **RESULTS**

### **1.1 SAMPLE PRESENTATION**

Three distinct sample presentations were identified during the SEM analysis of the products. These have been labelled as pellets (type I and II) and mini-tablets.

Type I pellets are the smallest of the three presentations, cylindrical in shape, approximately 0.9mm in diameter and varying in length between 1mm and 2.5mm. The diameter tends to be very regular, however the length tends to be more variable. The surface of the type I pellets is generally smooth with very straight sides, with a flat top or bottom, although a significant fraction of type 1 pellets has been observed with slightly convex ends or angled. Type I pellets are unique to Kreon products.

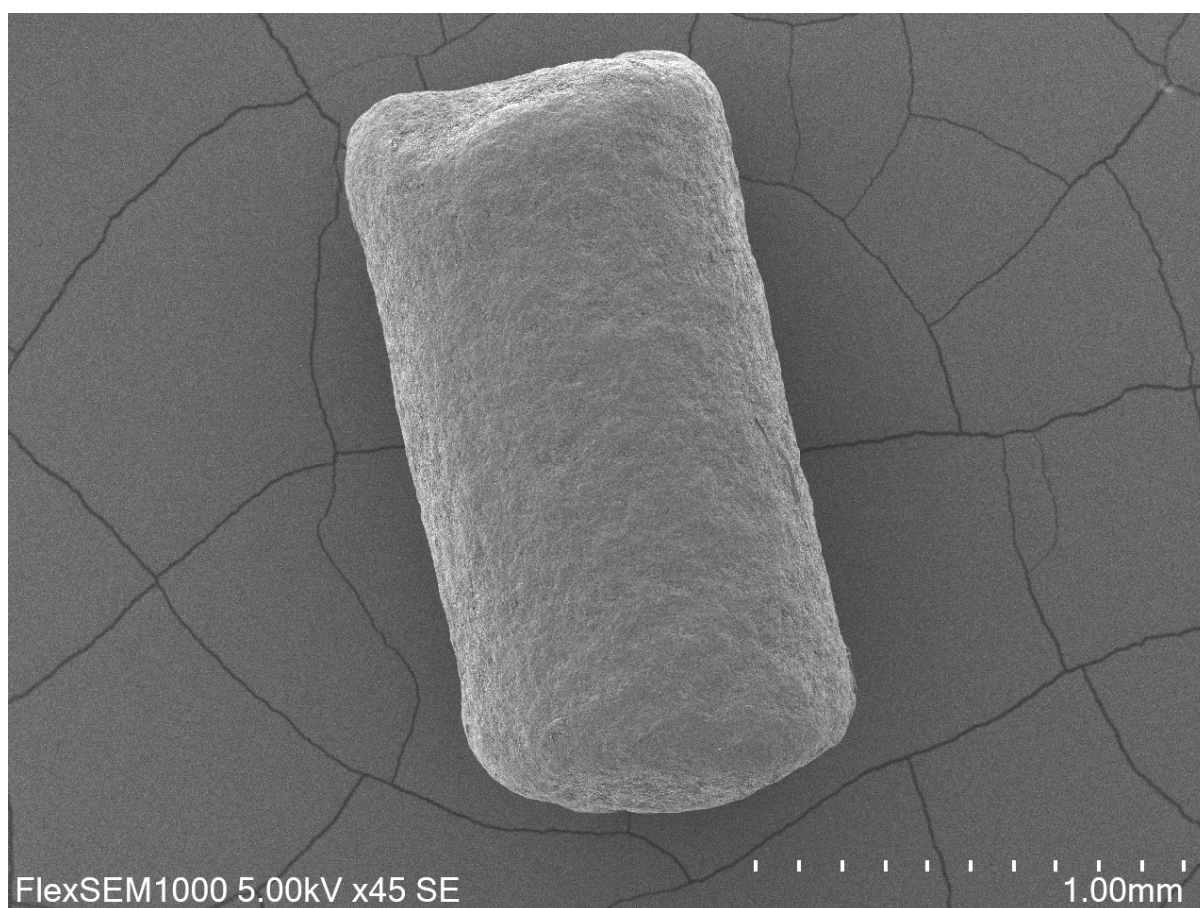

**Figure S1:** Example of Kreon type I pellets, Batch 58519, 10K Strength

Type II pellets are similar in shape to type I pellets, however generally larger in all orientations and less regular in size and shape. They are also cylindrical, approximately 1.2mm to 1.5mm in diameter and varying in length between 1.2mm and 3.0mm. They tend to have a less regular surface, sometimes with protruding “nodules”. Examples of type II pellets have been observed in batches from multiple vendors, for both mid and high strength products, although more commonly in higher strength products (e.g. 40K).



|  |                                           |
|--|-------------------------------------------|
|  |                                           |
|  | <b>Part 1 - Physical characterisation</b> |
|  | <b>Version: 1.0</b>                       |

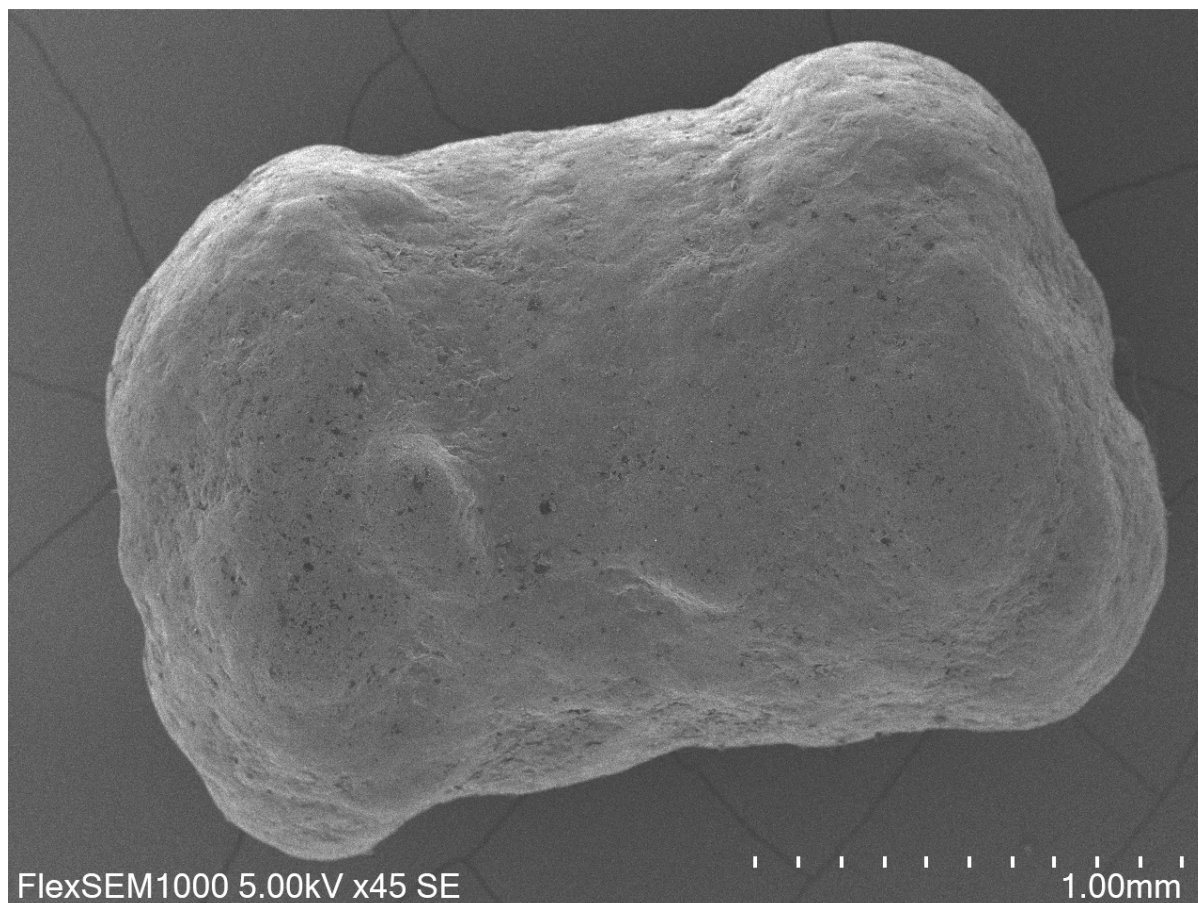

**Figure S2:** Example of type II pellet Presentation, Cotazym, Batch 507701, 30K Strength

Mini-Tablets (MT) are the largest of the three presentations, shaped like a cylinder with a domed top and bottom. They are approximately 2.2mm in their longest orientation (diagonally, top corner to bottom opposite corner, across the cylindrical centre) and marginally smaller end to end (domed peak to domed peak) and in diameter. They have a smooth surface and are very regular in size and shape. Examples of MT have been observed in batches from multiple vendors, for both low and mid strength products, although that are more commonly in mid strength products.

|  |                                           |
|--|-------------------------------------------|
|  |                                           |
|  | <b>Part 1 - Physical characterisation</b> |
|  | <b>Version: 1.0</b>                       |

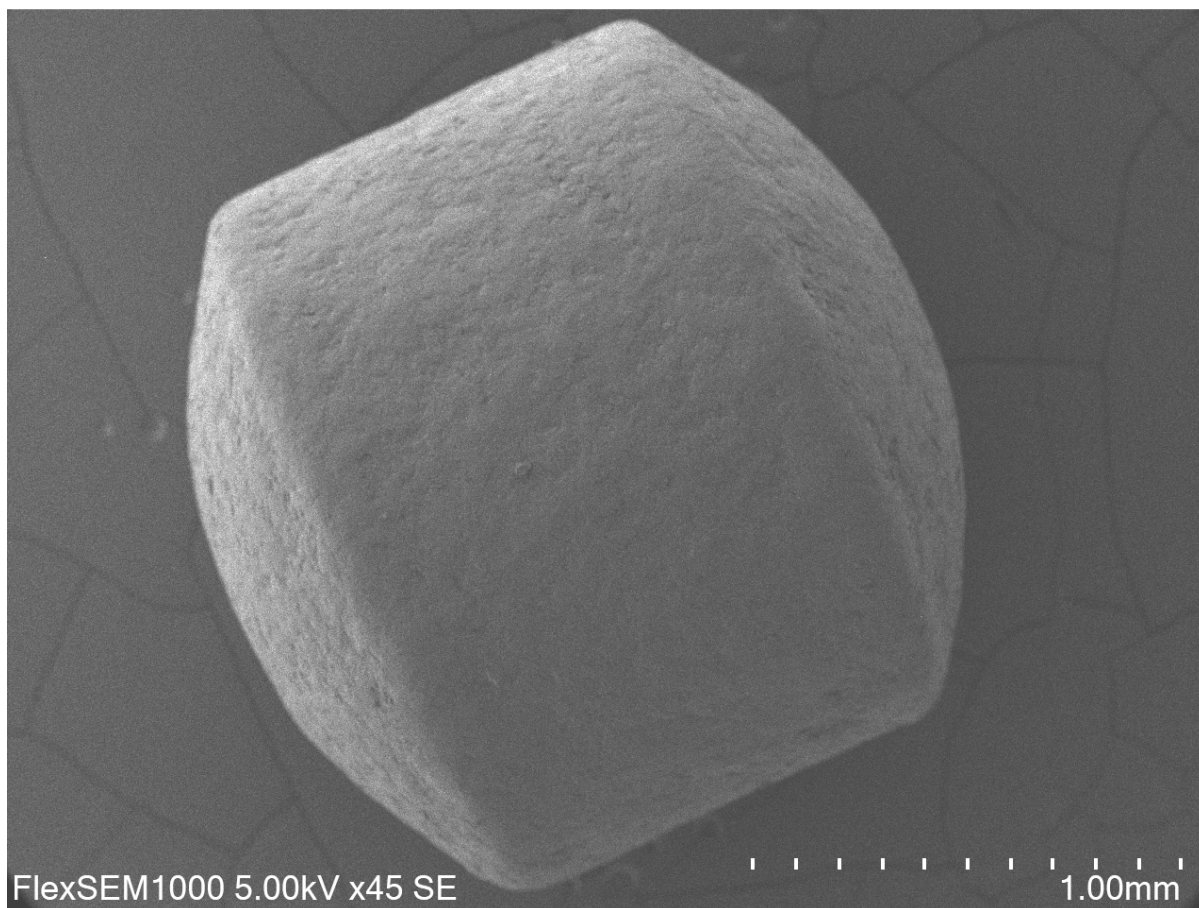

**Figure S3:** Example of Mini-Tablet presentation. Pankreatin, Batch 319301, 20K Strength.

A summary of batches observed with specific presentations can be found in Table S1, Table S2 and Table S3.

## 1.2 PARTICLE SIZE

All products were analysed as per MGR-METH-859063 v1 (validated internal method). Mean results are reported in Table S1 – Table S3 below for all batches, using the Feret Max, Feret Min and EQPC evaluation modes.

Table S1. Mean (n=3) Feret Max

| Product | Batch  | Strength | D[v,0.1]<br>µm | D[v,0.5]<br>µm | D[v,0.9]<br>µm | Presentation     |
|---------|--------|----------|----------------|----------------|----------------|------------------|
| Cotazym | 507401 | 20k      | 1952           | 2601           | 3525           | Pellet (type II) |
| Cotazym | 507701 | 30k      | 1925           | 2547           | 3422           | Pellet (type II) |
| Cotazym | 659101 | 40k      | 1886           | 2468           | 3360           | Pellet (type II) |

|  |                                           |
|--|-------------------------------------------|
|  |                                           |
|  | <b>Part 1 - Physical characterisation</b> |
|  | <b>Version: 1.0</b>                       |

|                        |        |     |       |       |       |                  |
|------------------------|--------|-----|-------|-------|-------|------------------|
| Creon                  | 57467  | 25k | 1173  | 1588  | 2246  | Pellet (type I)  |
| Creon                  | 57797  | 10k | 1131  | 1566  | 2225  | Pellet (type I)  |
| Creon                  | 58845  | 20k | 1179  | 1608  | 2222  | Pellet (type I)  |
| Creon                  | 58519  | 10k | 1100  | 1537  | 2219  | Pellet (type I)  |
| Creon                  | 57234  | 10k | 1116  | 1541  | 2191  | Pellet (type I)  |
| Creon                  | 58888  | 25k | 1179  | 1608  | 2170  | Pellet (type I)  |
| Creon                  | 59016  | 35k | 1131  | 1542  | 2167  | Pellet (type I)  |
| Creon                  | 58259  | 25k | 1122  | 1531  | 2161  | Pellet (type I)  |
| Creon                  | 59042  | 5K  | 1097  | 1449  | 2014  | Pellet (type I)  |
| Ozym                   | N002   | 40k | 1917  | 2528  | 3402  | Pellet (type II) |
| Ozym                   | N001   | 20k | 2345  | 2616  | 2886  | Mini-Tablet      |
| Mezym                  | 98013  | 10k | *N/A  | *N/A  | *N/A  | Tablet           |
| Pangrol                | 92019  | 40k | 1917  | 2529  | 3405  | Pellet (type II) |
| Pangrol                | 94166E | 10k | 2354  | 2632  | 2910  | Mini-Tablet      |
| Pangrol                | 84231E | 25k | 2338  | 2615  | 2892  | Mini-Tablet      |
| Pangrol                | 83147D | 10k | 2350  | 2616  | 2883  | Mini-Tablet      |
| Pangrol                | 93255H | 25k | 2352  | 2617  | 2883  | Mini-Tablet      |
| Pangrol                | 92027A | 20k | **N/A | **N/A | **N/A | Tablet           |
| Pankreatan             | 321301 | 10k | 2343  | 2612  | 2882  | Mini-Tablet      |
| Pankreatan             | 501201 | 20k | 2345  | 2614  | 2882  | Mini-Tablet      |
| Pankreatan             | 323101 | 25k | 2343  | 2612  | 2882  | Mini-Tablet      |
| Pankreatin             | 672401 | 40k | 1909  | 2519  | 3415  | Pellet (type II) |
| Pankreatin Laves Mikro | 319301 | 20k | 2340  | 2611  | 2882  | Mini-Tablet      |
| Pankreatin Laves Mikro | 012501 | 10k | 1467  | 1979  | 2667  | Pellet (type II) |
| Pankreatin Mikro       | 321401 | 20k | 2343  | 2618  | 2892  | Mini-Tablet      |
| Pankreatin Stada       | 92238  | 20k | 2342  | 2612  | 2882  | Mini-Tablet      |
| Panzytrat              | 670501 | 40k | 1940  | 2579  | 3476  | Pellet (type II) |
| Panzytrat              | 413201 | 25k | 2341  | 2614  | 2886  | Mini-Tablet      |
| Panzytrat              | 337801 | 10k | 2343  | 2615  | 2887  | Mini-Tablet      |
| Panzytrat              | 358001 | 20k | 2343  | 2615  | 2886  | Mini-Tablet      |
| Panzytrat              | 412801 | 25k | 2345  | 2614  | 2882  | Mini-Tablet      |

\*Tablet size = 10.31 mm

\*\*Tablet size = 11.39 mm

## Part 1 - Physical characterisation

Version: 1.0

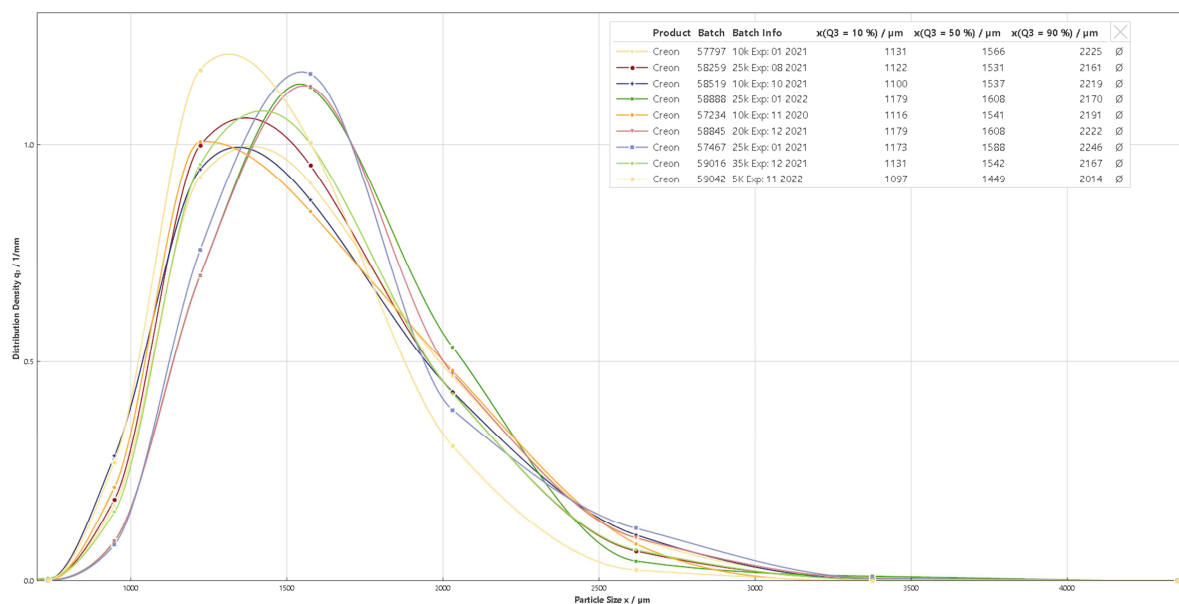

Figure S1. Pellet (type I) – Feret Max

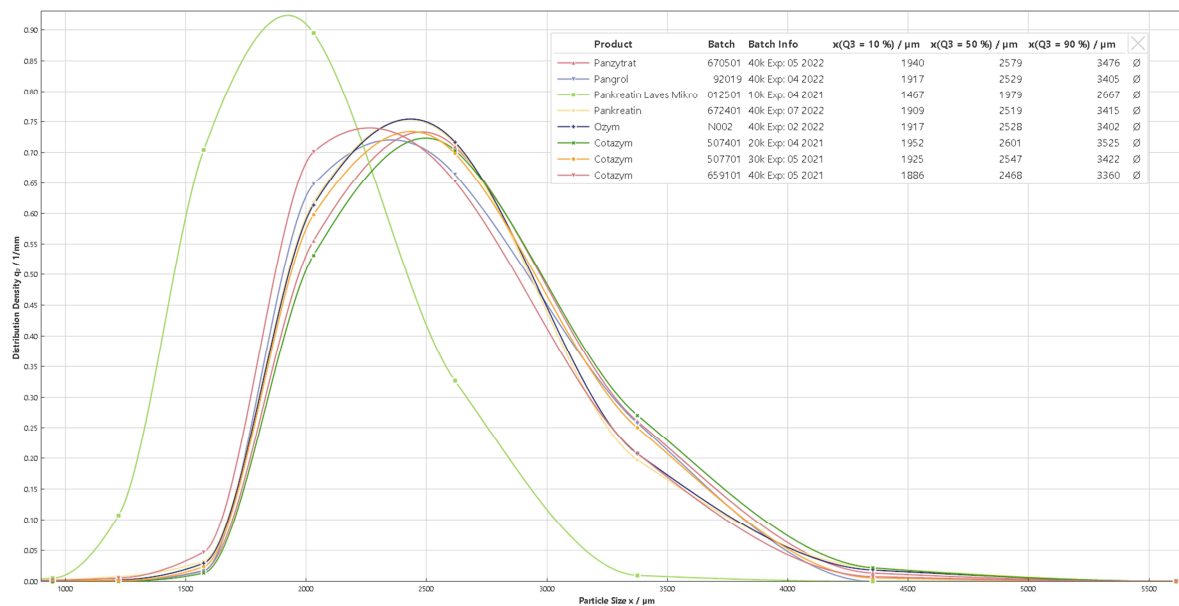

Figure S2. Pellet (type II) – Feret Max

Effective Date: 3/15/2021 5:13:06 AM

## Part 1 - Physical characterisation

Version: 1.0

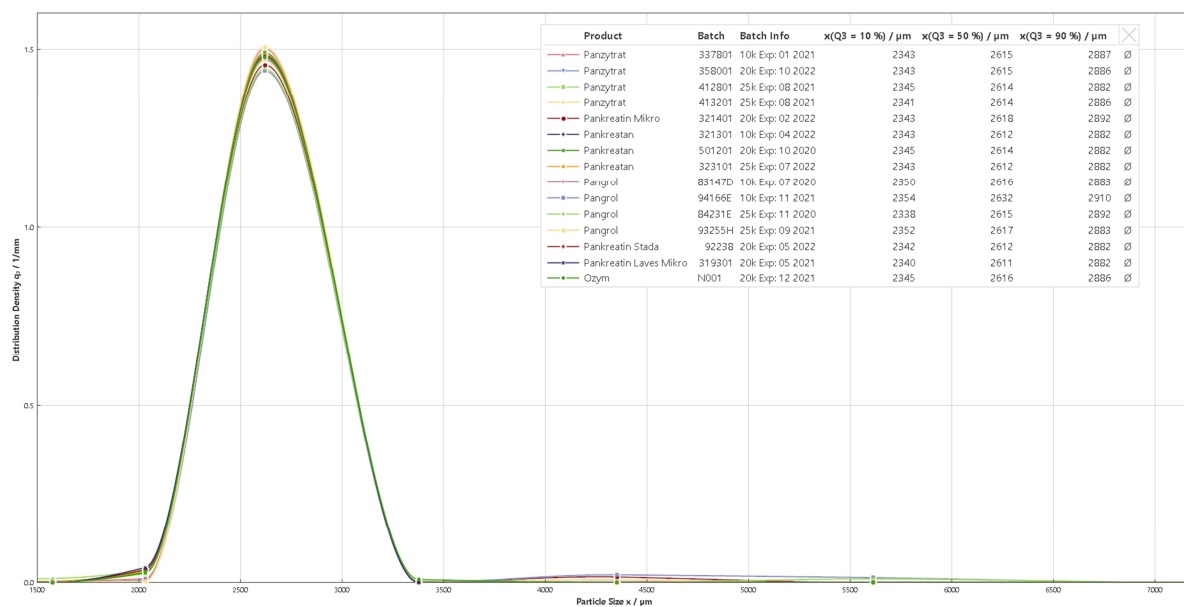

Figure S3. Mini-tablet – Feret Max

## Part 1 - Physical characterisation

Version: 1.0

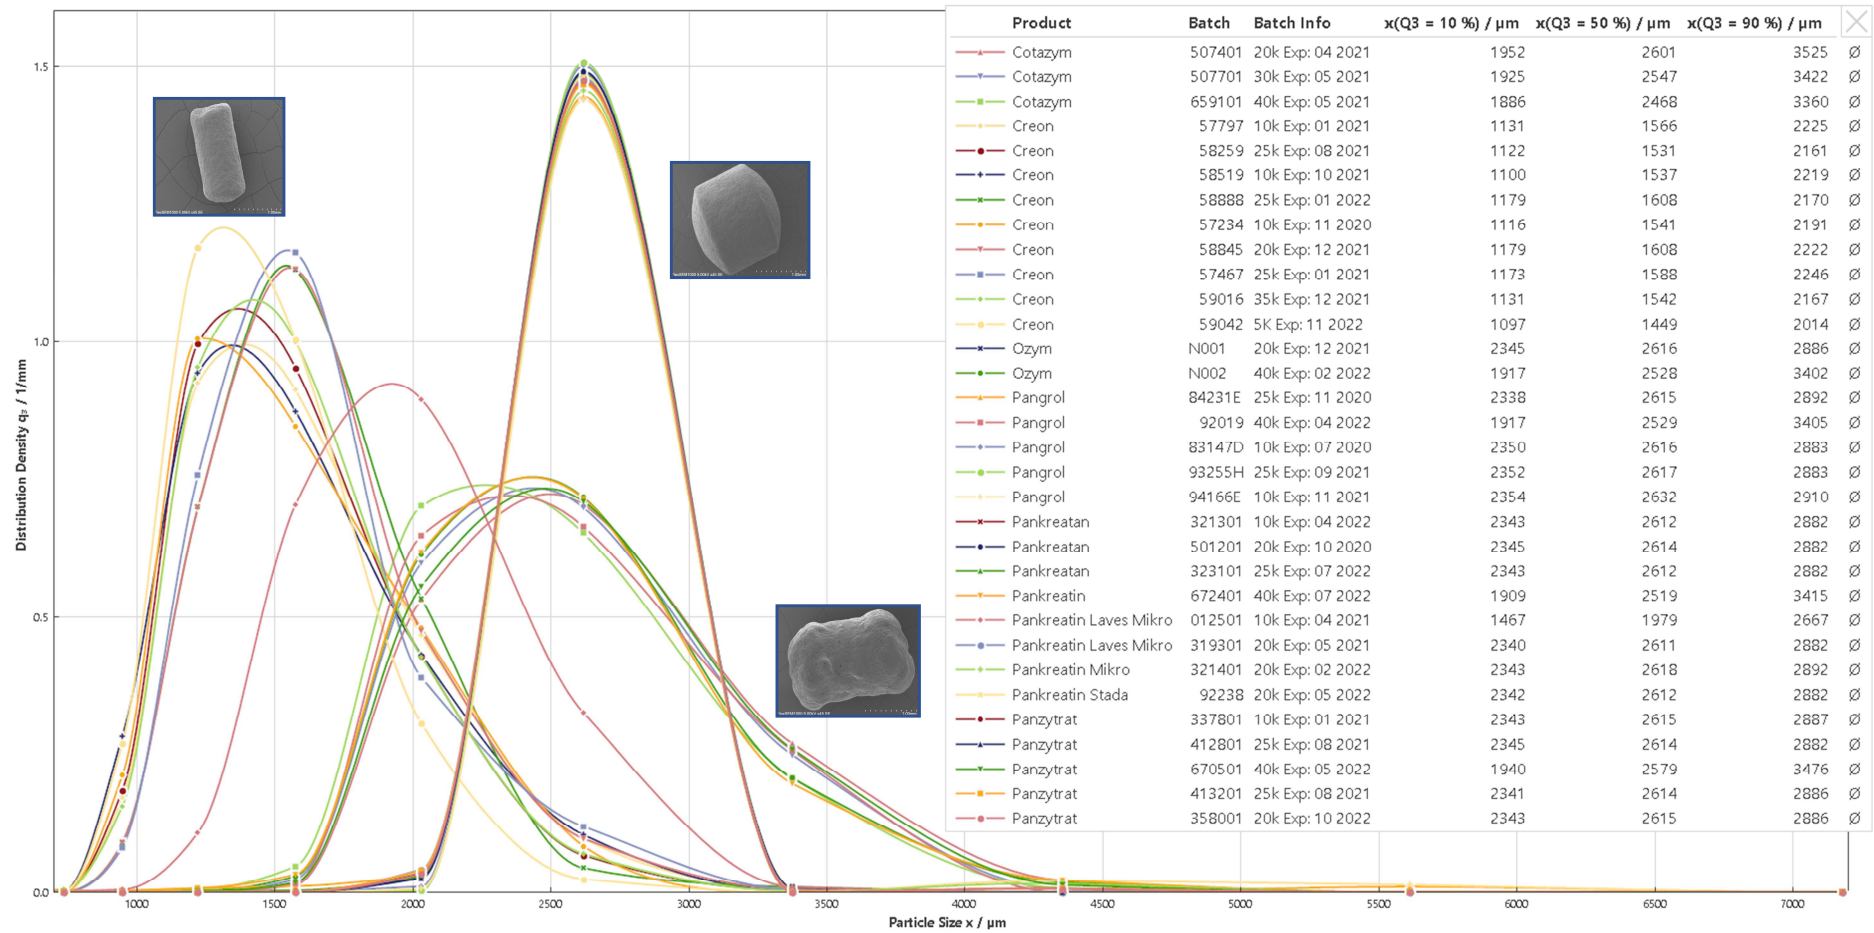

Figure S4. All Batches – Feret Max

|  |                                           |
|--|-------------------------------------------|
|  |                                           |
|  | <b>Part 1 - Physical characterisation</b> |
|  | <b>Version: 1.0</b>                       |

Table S2. Mean (n=3) Feret Min

| Product                | Batch  | Strength | D[v,0.1]<br>µm | D[v,0.5]<br>µm | D[v,0.9]<br>µm | Presentation     |
|------------------------|--------|----------|----------------|----------------|----------------|------------------|
| Cotazym                | 507401 | 20k      | 1453           | 1771           | 2187           | Pellet (type II) |
| Cotazym                | 507701 | 30k      | 1441           | 1721           | 2169           | Pellet (type II) |
| Cotazym                | 659101 | 40k      | 1425           | 1656           | 2116           | Pellet (type II) |
| Creon                  | 57797  | 10k      | 863            | 1042           | 1448           | Pellet (type I)  |
| Creon                  | 58259  | 25k      | 857            | 995            | 1388           | Pellet (type I)  |
| Creon                  | 58519  | 10k      | 849            | 1043           | 1374           | Pellet (type I)  |
| Creon                  | 58888  | 25k      | 894            | 1152           | 1356           | Pellet (type I)  |
| Creon                  | 57234  | 10k      | 856            | 994            | 1438           | Pellet (type I)  |
| Creon                  | 58845  | 20k      | 908            | 1176           | 1363           | Pellet (type I)  |
| Creon                  | 57467  | 25k      | 928            | 1196           | 1392           | Pellet (type I)  |
| Creon                  | 59016  | 35k      | 866            | 1041           | 1357           | Pellet (type I)  |
| Creon                  | 59042  | 5K       | 846            | 948            | 1049           | Pellet (type I)  |
| Ozym                   | N001   | 20k      | 1825           | 2031           | 2237           | Mini-Tablet      |
| Ozym                   | N002   | 40k      | 1446           | 1748           | 2179           | Pellet (Type II) |
| Mezym                  | 98013  | 10k      | *N/A           | *N/A           | *N/A           | Tablet           |
| Pangrol                | 84231E | 25k      | 1820           | 2030           | 2241           | Mini-Tablet      |
| Pangrol                | 92019  | 40k      | 1437           | 1697           | 2153           | Pellet (type II) |
| Pangrol                | 83147D | 10k      | 1825           | 2031           | 2236           | Mini-Tablet      |
| Pangrol                | 93255H | 25k      | 1824           | 2031           | 2237           | Mini-Tablet      |
| Pangrol                | 94166E | 10k      | 1826           | 2041           | 2255           | Mini-Tablet      |
| Pangrol                | 92027A | 20k      | **N/A          | **N/A          | **N/A          | Tablet           |
| Pankreatan             | 321301 | 10k      | 1822           | 2029           | 2236           | Mini-Tablet      |
| Pankreatan             | 501201 | 20k      | 1825           | 2030           | 2236           | Mini-Tablet      |
| Pankreatan             | 323101 | 25k      | 1824           | 2030           | 2236           | Mini-Tablet      |
| Pankreatin             | 672401 | 40k      | 1430           | 1680           | 2150           | Pellet (type II) |
| Pankreatin Laves Mikro | 012501 | 10k      | 1097           | 1253           | 1571           | Pellet (type II) |
| Pankreatin Laves Mikro | 319301 | 20k      | 1825           | 2030           | 2236           | Mini-Tablet      |
| Pankreatin Mikro       | 321401 | 20k      | 1825           | 2031           | 2238           | Mini-Tablet      |
| Pankreatin Stada       | 92238  | 20k      | 1823           | 2030           | 2236           | Mini-Tablet      |
| Panzytrat              | 337801 | 10k      | 1825           | 2031           | 2237           | Mini-Tablet      |
| Panzytrat              | 412801 | 25k      | 1825           | 2030           | 2236           | Mini-Tablet      |
| Panzytrat              | 670501 | 40k      | 1441           | 1719           | 2171           | Pellet (type II) |
| Panzytrat              | 413201 | 25k      | 1824           | 2031           | 2237           | Mini-Tablet      |
| Panzytrat              | 358001 | 20k      | 1825           | 2032           | 2238           | Mini-Tablet      |

\*Tablet size = 10.31 mm

\*\*Tablet size = 11.39 mm

## Part 1 - Physical characterisation

Version: 1.0

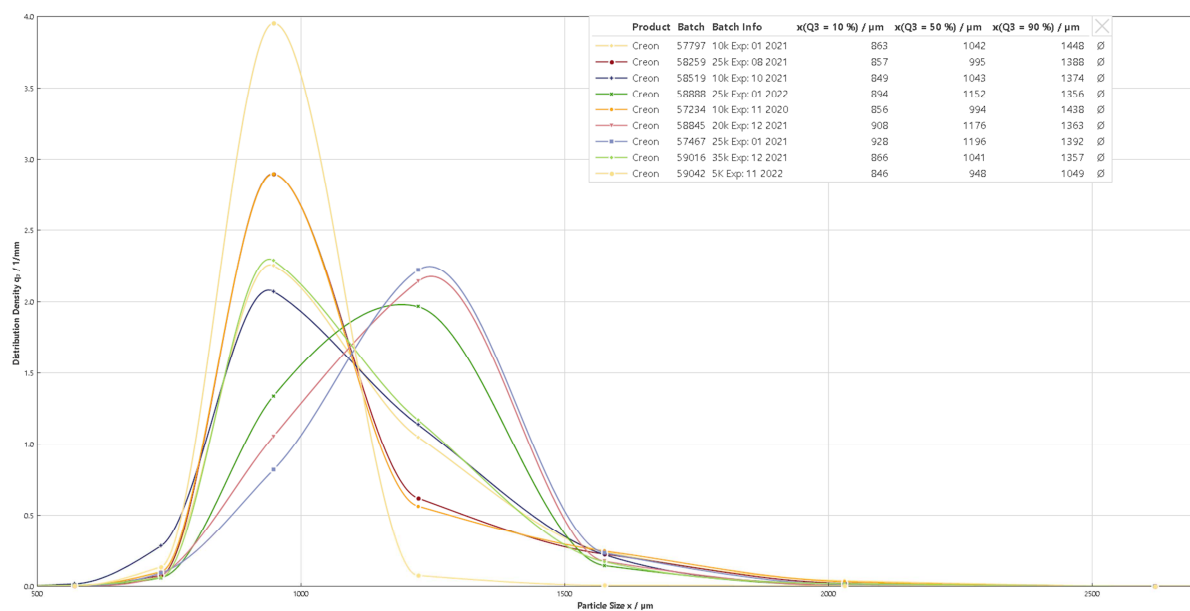

Figure S5. Pellet (type I) - Feret min

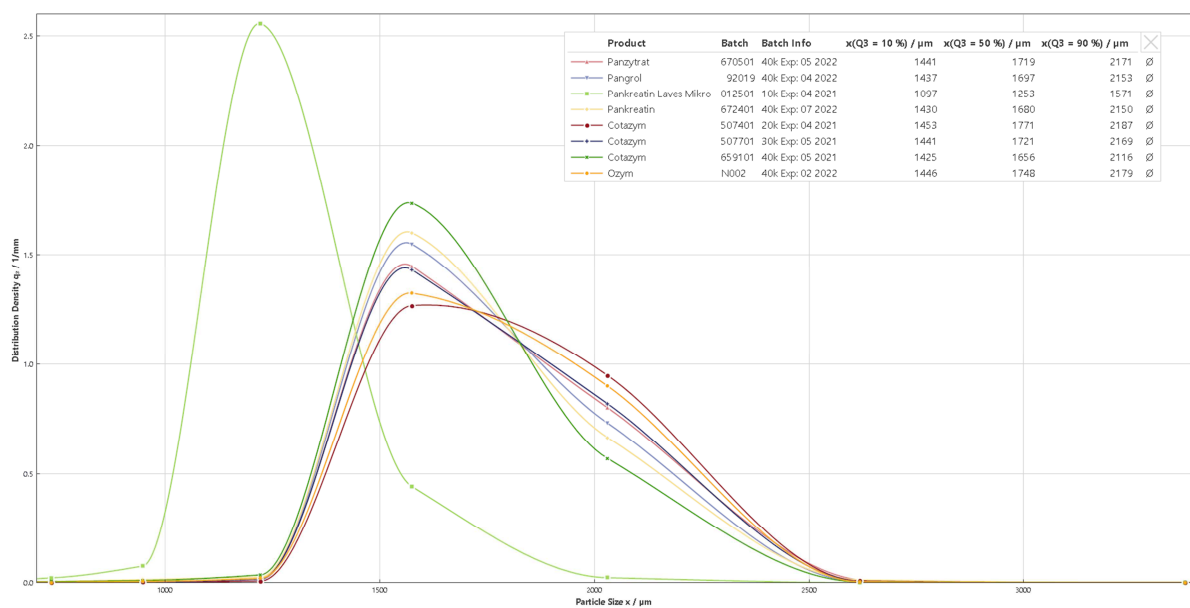

Figure S6. Pellet (type II) - Feret Min



## Part 1 - Physical characterisation

Version: 1.0

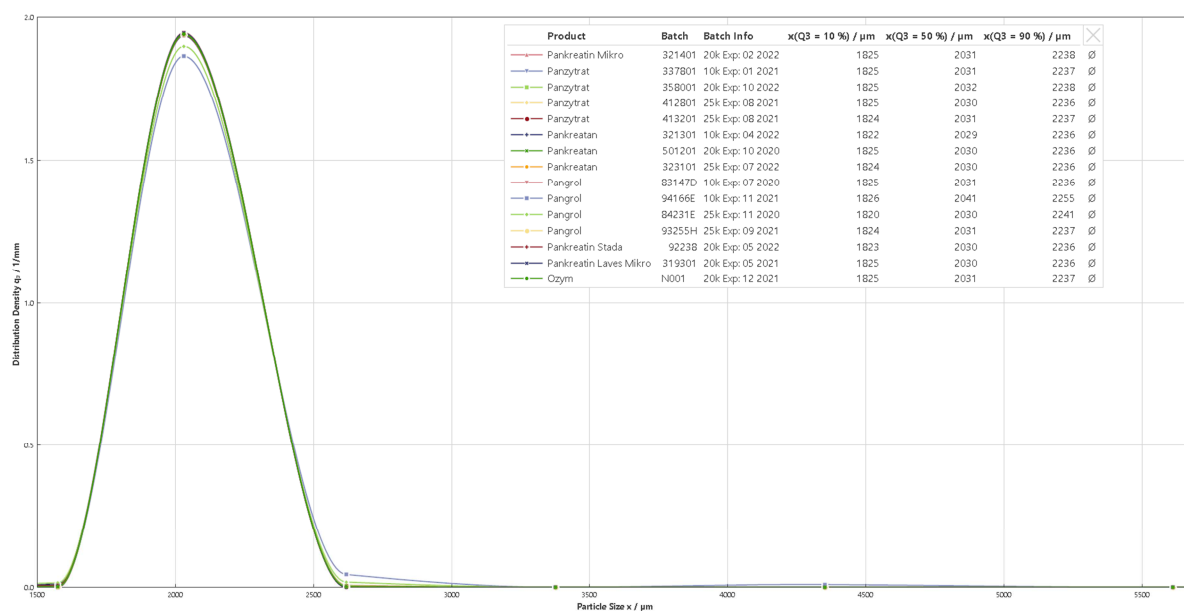

Figure S7. Mini-Tablet - Feret Min

## Part 1 - Physical characterisation

Version: 1.0

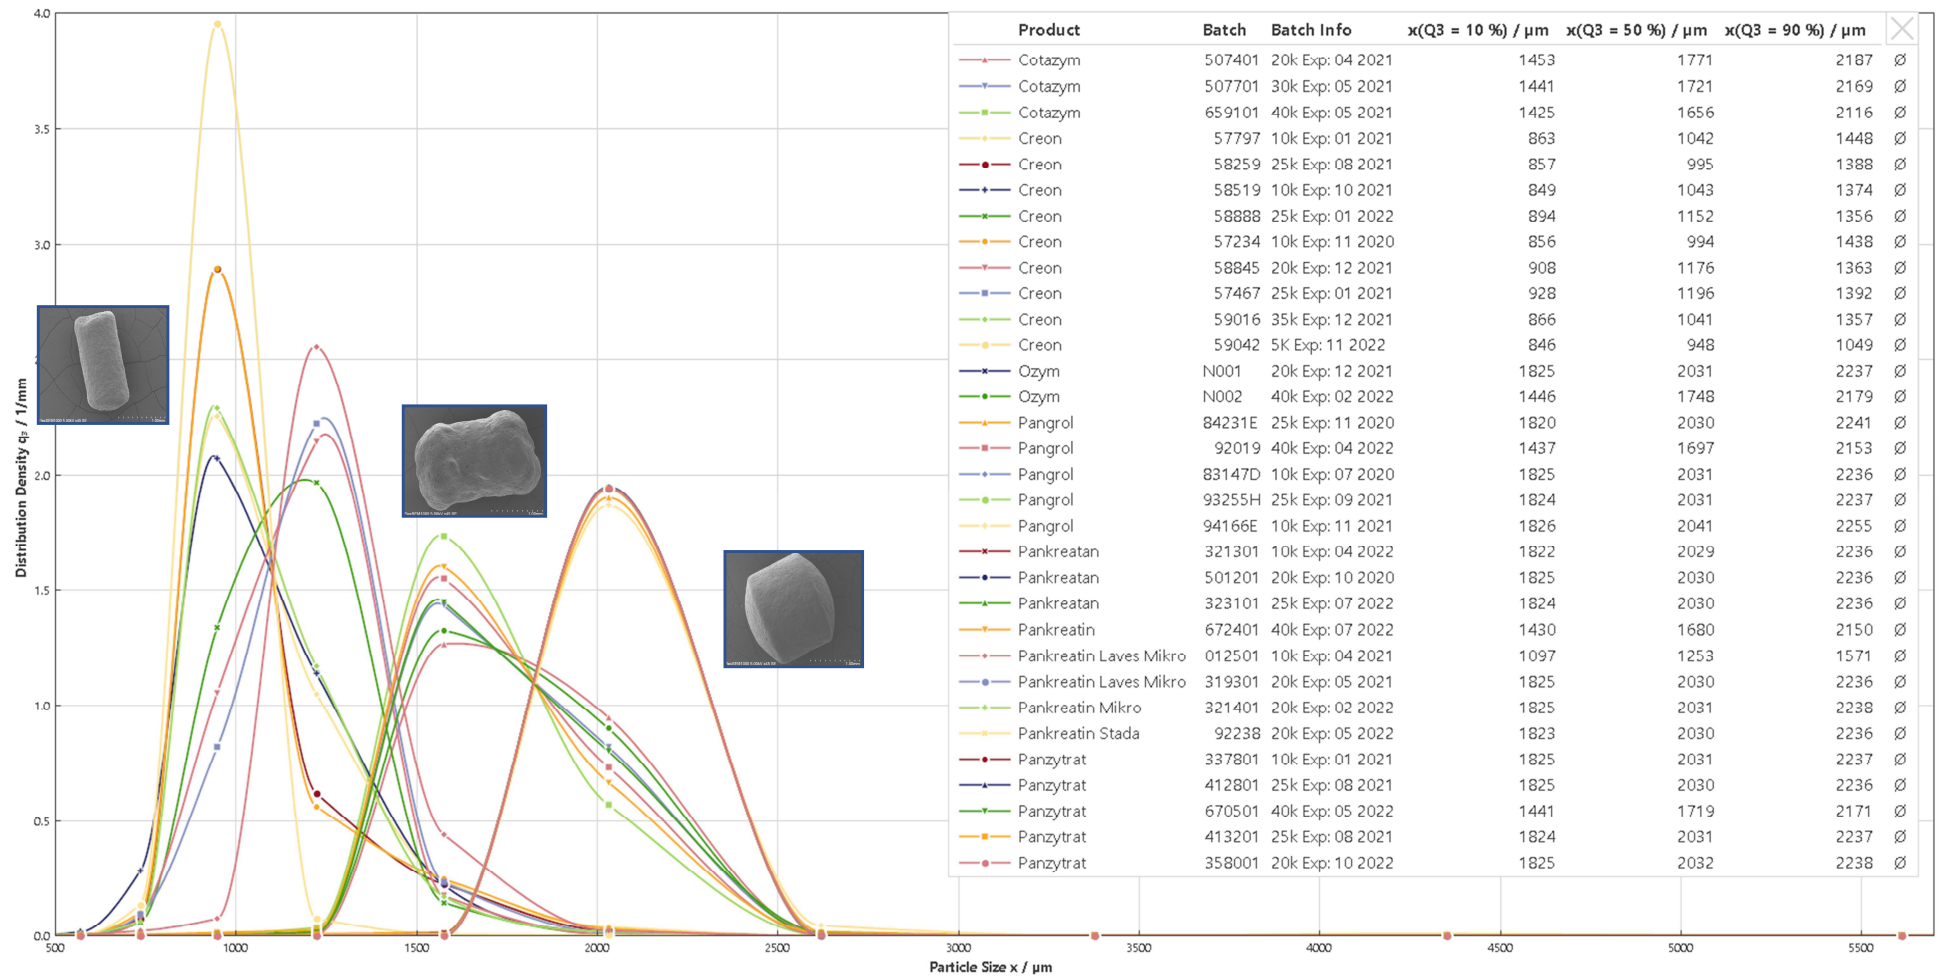

Figure S8. Representative batches of each presentation - Feret Min

|  |                                           |
|--|-------------------------------------------|
|  |                                           |
|  | <b>Part 1 - Physical characterisation</b> |
|  | <b>Version: 1.0</b>                       |

Table S3. Mean (n=3) EQPC

| Product                | Batch  | Strength | D[v,0.1]<br>µm | D[v,0.5]<br>µm | D[v,0.9]<br>µm | Presentation     |
|------------------------|--------|----------|----------------|----------------|----------------|------------------|
| Cotazym                | 507401 | 20k      | 1788           | 2093           | 2680           | Pellet (type II) |
| Cotazym                | 507701 | 30k      | 1779           | 2081           | 2646           | Pellet (type II) |
| Cotazym                | 659101 | 40k      | 1659           | 2040           | 2548           | Pellet (type II) |
| Creon                  | 57797  | 10k      | 961            | 1260           | 1700           | Pellet (type I)  |
| Creon                  | 58259  | 25k      | 945            | 1230           | 1636           | Pellet (type I)  |
| Creon                  | 58519  | 10k      | 925            | 1235           | 1686           | Pellet (type I)  |
| Creon                  | 58888  | 25k      | 1059           | 1355           | 1708           | Pellet (type I)  |
| Creon                  | 57234  | 10k      | 932            | 1227           | 1644           | Pellet (type I)  |
| Creon                  | 58845  | 20k      | 1068           | 1340           | 1716           | Pellet (type I)  |
| Creon                  | 57467  | 25k      | 1071           | 1350           | 1737           | Pellet (type I)  |
| Creon                  | 59016  | 35k      | 976            | 1259           | 1676           | Pellet (type I)  |
| Creon                  | 59042  | 5K       | 912            | 1177           | 1384           | Pellet (type I)  |
| Ozym                   | N001   | 20k      | 1864           | 2228           | 2796           | Mini-Tablet      |
| Ozym                   | N002   | 40k      | 1772           | 2068           | 2615           | Pellet (type II) |
| Mezym                  | 98013  | 10k      | *N/A           | *N/A           | *N/A           | Tablet           |
| Pangrol                | 84231E | 25k      | 2330           | 2607           | 2884           | Mini-Tablet      |
| Pangrol                | 92019  | 40k      | 1761           | 2078           | 2639           | Pellet (type II) |
| Pangrol                | 83147D | 10k      | 2342           | 2612           | 2882           | Mini-Tablet      |
| Pangrol                | 93255H | 25k      | 2344           | 2613           | 2882           | Mini-Tablet      |
| Pangrol                | 94166E | 10k      | 2346           | 2622           | 2898           | Mini-Tablet      |
| Pangrol                | 92027A | 20k      | **N/A          | **N/A          | **N/A          | Tablet           |
| Pankreatan             | 321301 | 10k      | 1872           | 2277           | 2814           | Mini-Tablet      |
| Pankreatan             | 501201 | 20k      | 1866           | 2238           | 2800           | Mini-Tablet      |
| Pankreatan             | 323101 | 25k      | 1858           | 2204           | 2784           | Mini-Tablet      |
| Pankreatin             | 672401 | 40k      | 1719           | 2050           | 2545           | Pellet (type II) |
| Pankreatin Laves Mikro | 012501 | 10k      | 1255           | 1579           | 1985           | Pellet (type II) |
| Pankreatin Laves Mikro | 319301 | 20k      | 1847           | 2145           | 2733           | Mini-Tablet      |
| Pankreatin Mikro       | 321401 | 20k      | 1871           | 2269           | 2819           | Mini-Tablet      |
| Pankreatin Stada       | 92238  | 20k      | 1864           | 2242           | 2803           | Mini-Tablet      |
| Panzytrat              | 337801 | 10k      | 1864           | 2230           | 2802           | Mini-Tablet      |
| Panzytrat              | 412801 | 25k      | 1861           | 2214           | 2790           | Mini-Tablet      |
| Panzytrat              | 670501 | 40k      | 1789           | 2088           | 2672           | Pellet (type II) |
| Panzytrat              | 413201 | 25k      | 1860           | 2213           | 2795           | Mini-Tablet      |
| Panzytrat              | 358001 | 20k      | 1862           | 2214           | 2794           | Mini-Tablet      |

\*Tablet size = 10.31 mm

\*\*Tablet size = 11.39 mm

## Part 1 - Physical characterisation

Version: 1.0

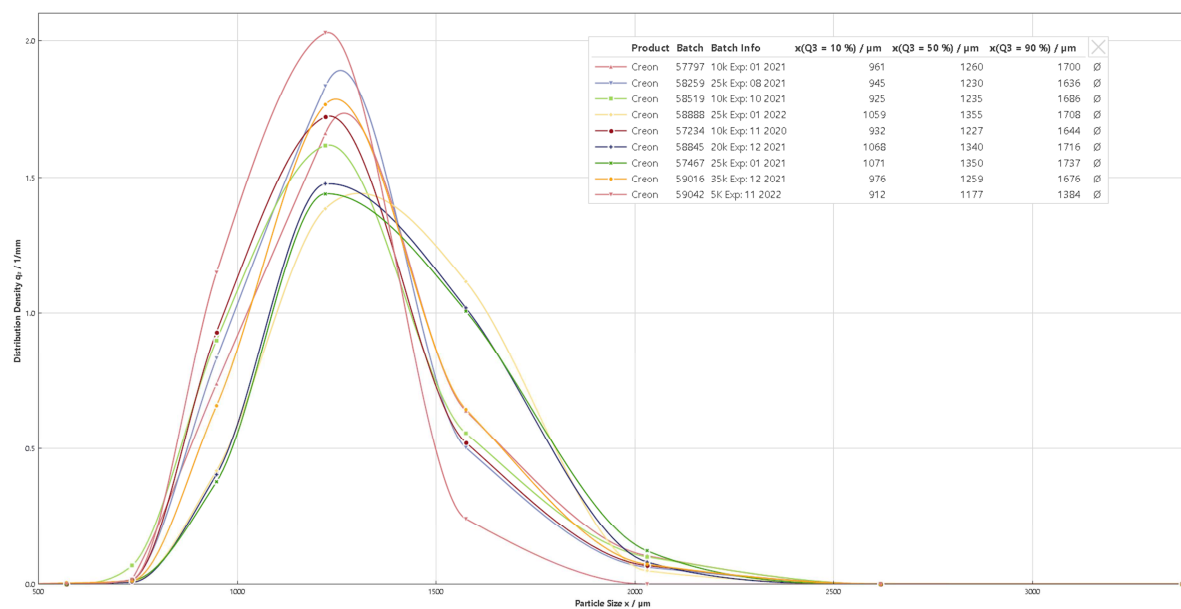

Figure S9. Pellet (type I) – EQPC

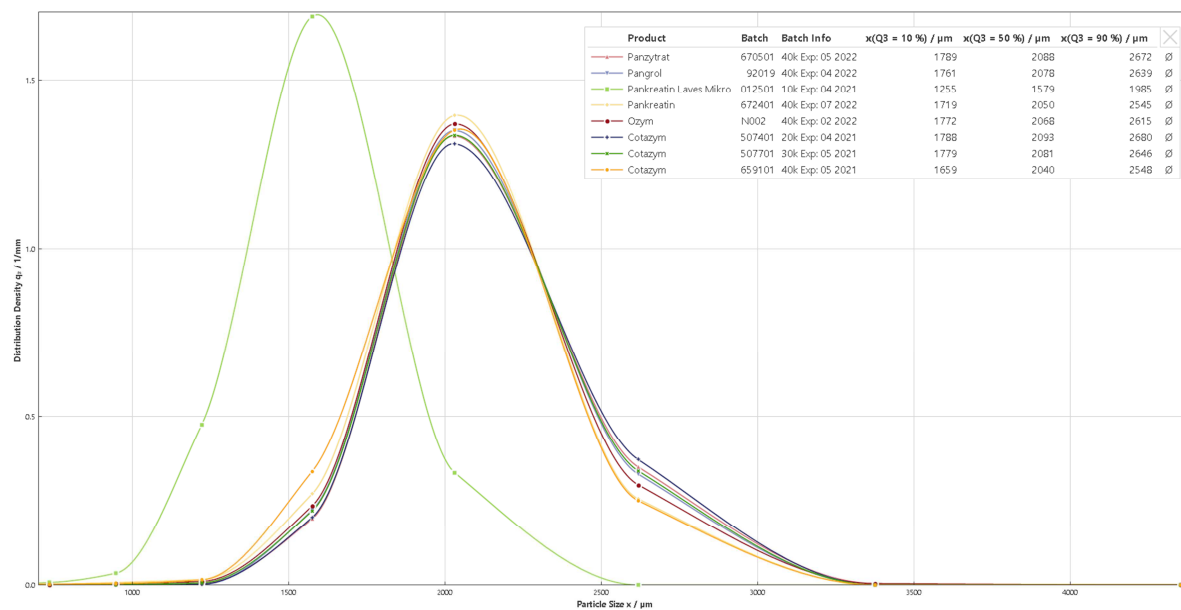

Figure S10. Pellet (type II) – EQPC

## Part 1 - Physical characterisation

Version: 1.0

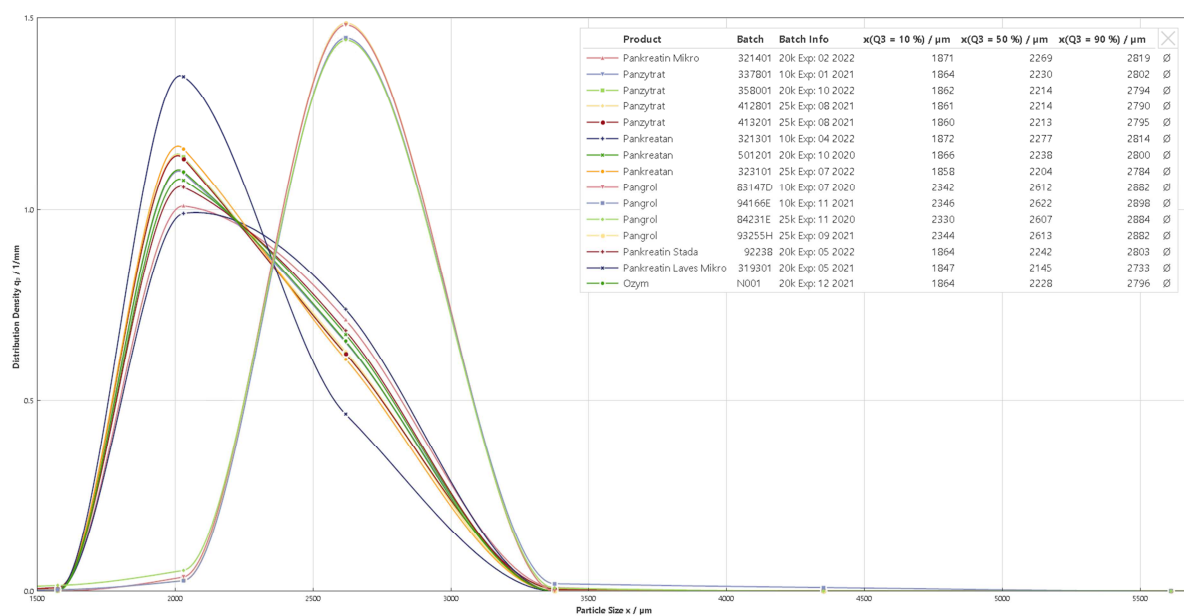

Figure S11. Mini-tablet – EQPC

## Part 1 - Physical characterisation

Version: 1.0

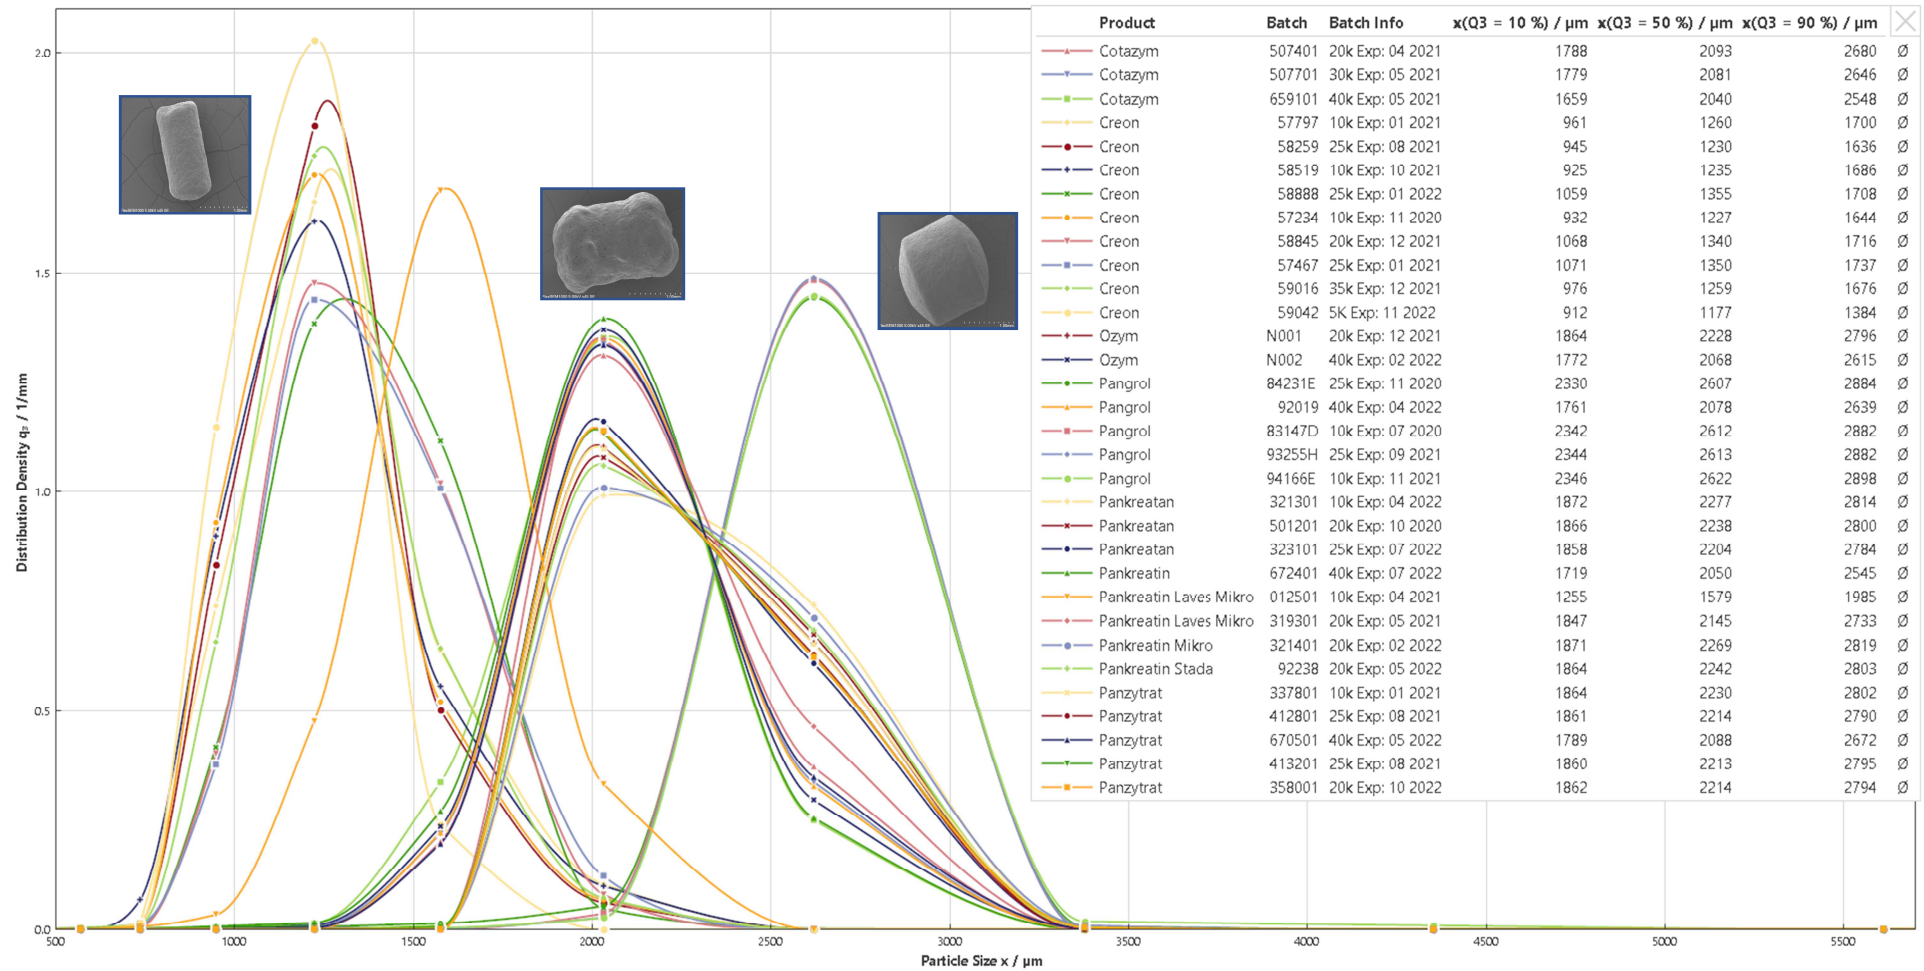

Figure S12. Representative batches of each presentation - EQPC

|  |                                           |
|--|-------------------------------------------|
|  |                                           |
|  | <b>Part 1 - Physical characterisation</b> |
|  | <b>Version: 1.0</b>                       |

### 1.3 PARTICLE COUNTING

The contents of Creon capsules, and those of its competitor products, were imaged using a high resolution Optimax EvoCam. A capsule was emptied onto a clean sheet of paper and gently agitated to disperse the contents (where the product is not contained within a capsule, a representative amount of sample was dispensed onto the paper using the provided spoons/ spatulas). This was repeated in triplicate for each batch.

These images were analyzed using the image analysis function of the ZenCore software (Zeiss Axio Imager light microscope software) to count the capsule contents. Some manual detection of particles was necessary to aid automatic detection where the detection settings were not able to differentiate between particles.

Due to large number of particles present in type II pellet batches, 2 images were taken for each capsule whereby the contents were roughly split in half to improve dispersion of the sample and to minimize touching particles. Images were analyzed as part 1 and part 2 for each replicate.

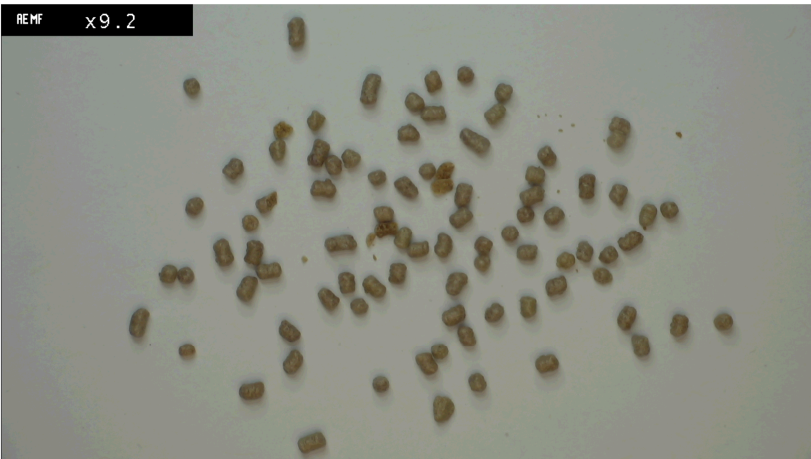

Figure S13. Example of image before analysis (Cotazym 30k 507701 Image 1)

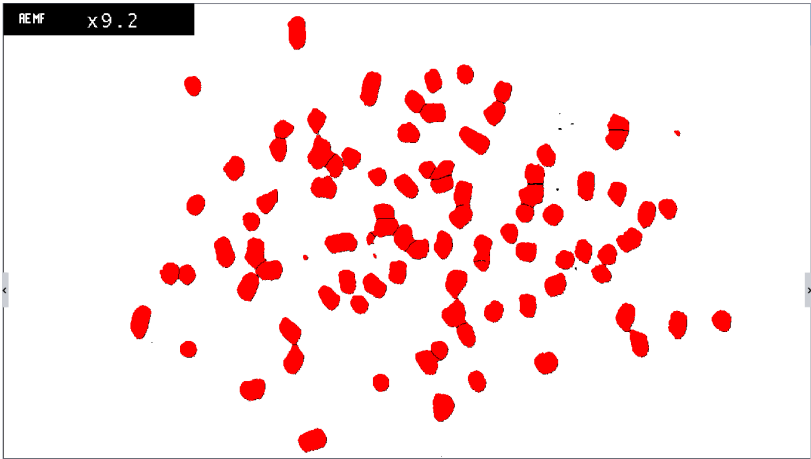

Figure S14. Example of analysed image (Cotazym 30k 507701 Image 1)

|  |                                           |
|--|-------------------------------------------|
|  |                                           |
|  | <b>Part 1 - Physical characterisation</b> |
|  | <b>Version: 1.0</b>                       |

Table S4. Particle count results

| Product | Batch  | Strength | Presentation     | Replicate | Total Particle count | Manually Detected Particles |
|---------|--------|----------|------------------|-----------|----------------------|-----------------------------|
| Cotazym | 507401 | 20k      | Pellet (type II) | 1         | 62                   | 0                           |
|         |        |          |                  | 2         | 60                   | 0                           |
|         |        |          |                  | 3         | 60                   | 3                           |
| Cotazym | 507701 | 30k      | Pellet (type II) | 1         | 92                   | 8                           |
|         |        |          |                  | 2         | 93                   | 4                           |
|         |        |          |                  | 3         | 84                   | 6                           |
| Cotazym | 659101 | 40k      | Pellet (type II) | 1         | 101                  | 4                           |
|         |        |          |                  | 2         | 97                   | 8                           |
|         |        |          |                  | 3         | 145                  | 12                          |
| Creon   | 57797  | 10k      | Pellet (type I)  | 1         | 268<br>(119 + 149)   | 10<br>(6 + 4)               |
|         |        |          |                  | 2         | 257<br>(104 + 153)   | 19<br>(6 + 13)              |
|         |        |          |                  | 3         | 260<br>(96 + 164)    | 17<br>(2 + 15)              |
| Creon   | 58259  | 25k      | Pellet (type I)  | 1         | 592<br>(314 + 278)   | 35<br>(13 + 22)             |
|         |        |          |                  | 2         | 608<br>(337 + 271)   | 26<br>(22 + 4)              |
|         |        |          |                  | 3         | 575<br>(285 + 290)   | 23<br>(17 + 6)              |
| Creon   | 58519  | 10k      | Pellet (type I)  | 1         | 279<br>(140 + 139)   | 17<br>(9 + 8)               |
|         |        |          |                  | 2         | 292<br>(140 + 152)   | 18<br>(3 + 15)              |
|         |        |          |                  | 3         | 313<br>(163 + 150)   | 20<br>(7 + 13)              |
| Creon   | 58888  | 25k      | Pellet (type I)  | 1         | 388<br>(175 + 213)   | 8<br>(4 + 4)                |
|         |        |          |                  | 2         | 412<br>(239 + 173)   | 3<br>(0 + 3)                |
|         |        |          |                  | 3         | 418<br>(185 + 233)   | 8<br>(3 + 5)                |
| Creon   | 57234  | 10k      | Pellet (type I)  | 1         | 314<br>(150 + 164)   | 23<br>(13 + 10)             |
|         |        |          |                  | 2         | 301<br>(142 + 159)   | 25<br>(9 + 16)              |
|         |        |          |                  | 3         | 291<br>(156 + 135)   | 32<br>(17 + 15)             |
| Creon   | 58845  | 20k      | Pellet (type I)  | 1         | 414<br>(204 + 210)   | 7<br>(7 + 0)                |



|  |                                           |  |  |  |  |  |
|--|-------------------------------------------|--|--|--|--|--|
|  |                                           |  |  |  |  |  |
|  | <b>Part 1 - Physical characterisation</b> |  |  |  |  |  |
|  | <b>Version: 1.0</b>                       |  |  |  |  |  |

|            |        |     |                  |   |                    |                 |
|------------|--------|-----|------------------|---|--------------------|-----------------|
|            |        |     |                  | 2 | 387<br>(193 + 194) | 4<br>(0 + 4)    |
|            |        |     |                  | 3 | 402<br>(229 + 173) | 3<br>(1 + 2)    |
|            |        |     |                  |   |                    |                 |
| Creon      | 57467  | 25k | Pellet (type I)  | 1 | 391<br>(221 + 170) | 9<br>(5 + 4)    |
|            |        |     |                  | 2 | 384<br>(215 + 169) | 13<br>(11 + 2)  |
|            |        |     |                  | 3 | 388<br>(192 + 196) | 11<br>(8 + 3)   |
| Creon      | 59016  | 35k | Pellet (type I)  | 1 | 726<br>(336 + 390) | 15<br>(4 + 11)  |
|            |        |     |                  | 2 | 765<br>(296 + 469) | 23<br>(8 + 15)  |
|            |        |     |                  | 3 | 735<br>(374 + 361) | 36<br>(15 + 21) |
| Creon      | 59042  | 5k  | Pellet (type I)  | 1 | 128                | 2               |
|            |        |     |                  | 2 | 132                | 0               |
|            |        |     |                  | 3 | 124                | 4               |
| Ozym       | N001   | 20k | Mini-Tablet      | 1 | 46                 | 0               |
|            |        |     |                  | 2 | 43                 | 0               |
|            |        |     |                  | 3 | 48                 | 0               |
| Ozym       | N002   | 40k | Pellet (type II) | 1 | 94                 | 4               |
|            |        |     |                  | 2 | 95                 | 3               |
|            |        |     |                  | 3 | 92                 | 0               |
| Pangrol    | 84231E | 25k | Mini-Tablet      | 1 | 48                 | 0               |
|            |        |     |                  | 2 | 61                 | 0               |
|            |        |     |                  | 3 | 47                 | 0               |
| Pangrol    | 92019  | 40k | Pellet (type II) | 1 | 102                | 12              |
|            |        |     |                  | 2 | 96                 | 3               |
|            |        |     |                  | 3 | 94                 | 9               |
| Pangrol    | 83147D | 10k | Mini-Tablet      | 1 | 19                 | 0               |
|            |        |     |                  | 2 | 20                 | 0               |
|            |        |     |                  | 3 | 20                 | 0               |
| Pangrol    | 93255H | 25k | Mini-Tablet      | 1 | 43                 | 0               |
|            |        |     |                  | 2 | 45                 | 0               |
|            |        |     |                  | 3 | 48                 | 0               |
| Pangrol    | 94166E | 10k | Mini-Tablet      | 1 | 19                 | 0               |
|            |        |     |                  | 2 | 20                 | 0               |
|            |        |     |                  | 3 | 21                 | 0               |
| Pankreatan | 321301 | 10k | Mini-Tablet      | 1 | 30                 | 0               |
|            |        |     |                  | 2 | 22                 | 0               |
|            |        |     |                  | 3 | 23                 | 0               |
| Pankreatan | 501201 | 20k | Mini-Tablet      | 1 | 48                 | 0               |

|  |                                           |  |  |  |  |
|--|-------------------------------------------|--|--|--|--|
|  |                                           |  |  |  |  |
|  | <b>Part 1 - Physical characterisation</b> |  |  |  |  |
|  | <b>Version: 1.0</b>                       |  |  |  |  |

|                           |        |     |                  |   |     |    |
|---------------------------|--------|-----|------------------|---|-----|----|
|                           |        |     |                  | 2 | 45  | 0  |
|                           |        |     |                  | 3 | 45  | 0  |
| Pankreatan                | 323101 | 25k | Mini-Tablet      | 1 | 58  | 0  |
|                           |        |     |                  | 2 | 60  | 0  |
|                           |        |     |                  | 3 | 54  | 0  |
| Pankreatin                | 672401 | 40k | Pellet (type II) | 1 | 97  | 6  |
|                           |        |     |                  | 2 | 108 | 10 |
|                           |        |     |                  | 3 | 100 | 11 |
| Pankreatin<br>Laves Mikro | 319301 | 20k | Mini-Tablet      | 1 | 43  | 0  |
|                           |        |     |                  | 2 | 44  | 0  |
|                           |        |     |                  | 3 | 42  | 0  |
| Pankreatin<br>Laves Mikro | 012501 | 10k | Pellet (type II) | 1 | 78  | 6  |
|                           |        |     |                  | 2 | 74  | 2  |
|                           |        |     |                  | 3 | 81  | 6  |
| Pankreatin<br>Mikro       | 321401 | 20k | Mini-Tablet      | 1 | 50  | 0  |
|                           |        |     |                  | 2 | 49  | 0  |
|                           |        |     |                  | 3 | 48  | 0  |
| Pankreatin<br>Stada       | 92238  | 20k | Mini-Tablet      | 1 | 46  | 0  |
|                           |        |     |                  | 2 | 49  | 0  |
|                           |        |     |                  | 3 | 46  | 0  |
| Panzytrat                 | 337801 | 10k | Mini-Tablet      | 1 | 28  | 0  |
|                           |        |     |                  | 2 | 26  | 0  |
|                           |        |     |                  | 3 | 25  | 0  |
| Panzytrat                 | 412801 | 25k | Mini-Tablet      | 1 | 49  | 0  |
|                           |        |     |                  | 2 | 51  | 0  |
|                           |        |     |                  | 3 | 50  | 0  |
| Panzytrat                 | 670501 | 40k | Pellet (type II) | 1 | 99  | 10 |
|                           |        |     |                  | 2 | 96  | 6  |
|                           |        |     |                  | 3 | 100 | 8  |
| Panzytrat                 | 413201 | 25k | Mini-Tablet      | 1 | 49  | 0  |
|                           |        |     |                  | 2 | 48  | 2  |
|                           |        |     |                  | 3 | 44  | 0  |
| *Panzytrat                | 358001 | 20k | Mini-Tablet      | 1 | 50  | 0  |

\*Only one replicate performed as material is supplied in bottles of 20g and patients use dosing spoons to sample a fixed number of particles (50 or 13).

|  |                                           |
|--|-------------------------------------------|
|  |                                           |
|  | <b>Part 1 - Physical characterisation</b> |
|  | <b>Version: 1.0</b>                       |

## **CONCLUSIONS**

### **SEM**

SEM analysis of all Creon and competitor products showed three distinct sample presentations subsequently labelled as type I pellets, type II pellets and Mini-tablets. All Creon batches presented as type I pellets, all Cotazym and other high strength products presented as type II pellets and all other low and mid strength products presented as mini-tablets.

### **Particle Size**

Particle size was evaluated by Feret max, Feret min and EQPC.

Feret max results fall into three populations consistent with the SEM analysis observations, with mini-tablets being the largest (mean D90 = 2886 µm) and type I pellets being the smallest (mean D90 = 2179 µm) of the three presentations.

Feret min and EQPC results fall into four populations. Feret min type I pellets and EQPC type II pellets were divided into two populations, this is likely to be due to the orientation of the pellet as it passes the detector. Particle size of the presentations for feret min and EQPC showed the same trend as feret max results.

Pankreatin Laves Micro batch: 012501 was identified as a type II pellet but showed a smaller particle size and did not sit within the expected population for feret max, feret min or EQPC.

Pangrol 92027A and Mezym 98013 are tablet formulations and consequently were not analysed by QICPIC and instead the particle size was measured using callipers, giving 11.39 mm and 10.31 mm respectively.

### **Particle Counting**

Analysis of images taken for particle counting showed that capsules containing type I pellets had the largest number of individual particles and capsules containing mini-tablets had the least. Particle count range for each of the particle presentations and strengths can be found in Table S5.

Table S5. Particle counting summary

| <b>Strength</b>        | <b>5k</b> | <b>10k</b> | <b>20k</b> | <b>25k</b> | <b>30k</b> | <b>35k</b> | <b>40k</b> |
|------------------------|-----------|------------|------------|------------|------------|------------|------------|
| <b>Type I pellets</b>  | 124 – 132 | 257 – 314  | 387 – 414  | 384 – 608  | -          | 726 – 765  | -          |
| <b>Type II pellets</b> | -         | 74 – 81    | 60 – 62    | -          | 84 – 93    | -          | 92 – 145   |
| <b>Mini-tablets</b>    | -         | 19 – 30    | 42 – 50    | 43 – 61    | -          | -          | -          |

|  |                                           |
|--|-------------------------------------------|
|  |                                           |
|  | <b>Part 1 - Physical characterisation</b> |
|  | <b>Version: 1.0</b>                       |

## APPENDIX

Table S6. Replicate data for Feret Max

| Product | Batch  | Replicate | Strength | D[v,0.1] µm | D[v,0.5] µm | D[v,0.9] µm |
|---------|--------|-----------|----------|-------------|-------------|-------------|
| Cotazym | 507401 | 1         | 20k      | 1938.48     | 2582.74     | 3479.88     |
| Cotazym | 507401 | 2         | 20k      | 1943.96     | 2593.93     | 3492.38     |
| Cotazym | 507401 | 3         | 20k      | 1973.11     | 2626.72     | 3602.27     |
| Cotazym | 507701 | 1         | 30k      | 1946.91     | 2591.54     | 3482.83     |
| Cotazym | 507701 | 2         | 30k      | 1926.47     | 2566.99     | 3449.75     |
| Cotazym | 507701 | 3         | 30k      | 1902.90     | 2482.12     | 3333.04     |
| Cotazym | 659101 | 1         | 40k      | 1888.00     | 2457.47     | 3334.56     |
| Cotazym | 659101 | 2         | 40k      | 1873.60     | 2444.80     | 3354.96     |
| Cotazym | 659101 | 3         | 40k      | 1895.26     | 2501.78     | 3390.30     |
| Creon   | 57797  | 1         | 10k      | 1131.68     | 1577.71     | 2245.92     |
| Creon   | 57797  | 2         | 10k      | 1121.66     | 1533.57     | 2159.12     |
| Creon   | 57797  | 3         | 10k      | 1139.80     | 1585.27     | 2268.77     |
| Creon   | 58259  | 1         | 25k      | 1120.24     | 1524.74     | 2173.69     |
| Creon   | 58259  | 2         | 25k      | 1118.39     | 1502.11     | 2112.96     |
| Creon   | 58259  | 3         | 25k      | 1128.79     | 1566.65     | 2196.54     |
| Creon   | 58519  | 1         | 10k      | 1098.54     | 1511.97     | 2191.76     |
| Creon   | 58519  | 2         | 10k      | 1102.36     | 1555.69     | 2226.78     |
| Creon   | 58519  | 3         | 10k      | 1100.48     | 1543.27     | 2239.90     |
| Creon   | 58888  | 1         | 25k      | 1185.01     | 1614.22     | 2173.45     |
| Creon   | 58888  | 2         | 25k      | 1169.84     | 1593.87     | 2153.34     |
| Creon   | 58888  | 3         | 25k      | 1181.89     | 1615.12     | 2184.58     |
| Creon   | 57234  | 1         | 10k      | 1103.96     | 1496.47     | 2145.82     |
| Creon   | 57234  | 2         | 10k      | 1123.25     | 1554.72     | 2221.10     |
| Creon   | 57234  | 3         | 10k      | 1120.61     | 1570.64     | 2205.86     |
| Creon   | 58845  | 1         | 20k      | 1180.73     | 1604.49     | 2197.95     |
| Creon   | 58845  | 2         | 20k      | 1181.43     | 1602.85     | 2221.32     |
| Creon   | 58845  | 3         | 20k      | 1175.89     | 1617.02     | 2245.77     |
| Creon   | 57467  | 1         | 25k      | 1174.19     | 1585.73     | 2241.35     |
| Creon   | 57467  | 2         | 25k      | 1179.66     | 1603.12     | 2295.98     |
| Creon   | 57467  | 3         | 25k      | 1165.61     | 1575.28     | 2201.67     |
| Creon   | 59016  | 1         | 35k      | 1133.97     | 1543.67     | 2169.46     |

|  |                                           |
|--|-------------------------------------------|
|  |                                           |
|  | <b>Part 1 - Physical characterisation</b> |
|  | <b>Version: 1.0</b>                       |

| Product    | Batch  | Replicate | Strength | D[v,0.1] µm | D[v,0.5] µm | D[v,0.9] µm |
|------------|--------|-----------|----------|-------------|-------------|-------------|
| Creon      | 59016  | 2         | 35k      | 1126.07     | 1537.23     | 2167.18     |
| Creon      | 59016  | 3         | 35k      | 1133.57     | 1546.05     | 2163.79     |
| Creon      | 59042  | 1         | 5K       | 1102.89     | 1468.21     | 2042.28     |
| Creon      | 59042  | 2         | 5K       | 1093.14     | 1434.94     | 1991.63     |
| Creon      | 59042  | 3         | 5K       | 1095.01     | 1442.99     | 2007.77     |
| Lipancia   | 011119 | 1         | 8k       | 1555.56     | 2142.07     | 2795.42     |
| Lipancia   | 011119 | 2         | 8k       | 1545.60     | 2131.81     | 2848.60     |
| Lipancia   | 011119 | 3         | 8k       | 1525.05     | 2086.80     | 2799.32     |
| Ozym       | N001   | 1         | 20k      | 2348.25     | 2621.77     | 2895.29     |
| Ozym       | N001   | 2         | 20k      | 2343.82     | 2612.87     | 2881.92     |
| Ozym       | N001   | 3         | 20k      | 2343.07     | 2612.45     | 2881.83     |
| Ozym       | N002   | 1         | 40k      | 1928.67     | 2555.09     | 3487.10     |
| Ozym       | N002   | 2         | 40k      | 1920.32     | 2550.49     | 3446.26     |
| Ozym       | N002   | 3         | 40k      | 1901.77     | 2478.67     | 3273.11     |
| Pangrol    | 84231E | 1         | 25k      | 2333.11     | 2609.17     | 2885.22     |
| Pangrol    | 84231E | 2         | 25k      | 2333.47     | 2607.12     | 2880.77     |
| Pangrol    | 84231E | 3         | 25k      | 2347.91     | 2628.53     | 2909.14     |
| Pangrol    | 92019  | 1         | 40k      | 1924.14     | 2543.22     | 3430.75     |
| Pangrol    | 92019  | 2         | 40k      | 1905.57     | 2529.84     | 3469.65     |
| Pangrol    | 92019  | 3         | 40k      | 1922.52     | 2513.40     | 3314.77     |
| Pangrol    | 83147D | 1         | 10k      | 2351.22     | 2616.98     | 2882.74     |
| Pangrol    | 83147D | 2         | 10k      | 2348.38     | 2615.40     | 2882.42     |
| Pangrol    | 83147D | 3         | 10k      | 2349.02     | 2615.76     | 2882.50     |
| Pangrol    | 93255H | 1         | 25k      | 2353.47     | 2618.23     | 2882.99     |
| Pangrol    | 93255H | 2         | 25k      | 2351.98     | 2617.40     | 2882.82     |
| Pangrol    | 93255H | 3         | 25k      | 2349.93     | 2616.26     | 2882.60     |
| Pangrol    | 94166E | 1         | 10k      | 2357.39     | 2646.11     | 2934.83     |
| Pangrol    | 94166E | 2         | 10k      | 2350.69     | 2625.88     | 2901.08     |
| Pangrol    | 94166E | 3         | 10k      | 2354.73     | 2624.69     | 2894.65     |
| Pankreatan | 321301 | 1         | 10k      | 2344.23     | 2613.10     | 2881.96     |
| Pankreatan | 321301 | 2         | 10k      | 2344.79     | 2613.41     | 2882.03     |
| Pankreatan | 321301 | 3         | 10k      | 2340.08     | 2610.79     | 2881.50     |
| Pankreatan | 501201 | 1         | 20k      | 2342.08     | 2611.90     | 2881.72     |
| Pankreatan | 501201 | 2         | 20k      | 2346.50     | 2614.36     | 2882.22     |
| Pankreatan | 501201 | 3         | 20k      | 2346.81     | 2614.53     | 2882.25     |
| Pankreatan | 323101 | 1         | 25k      | 2341.48     | 2611.57     | 2881.66     |
| Pankreatan | 323101 | 2         | 25k      | 2342.26     | 2612.00     | 2881.74     |

|  |                                           |  |  |  |  |  |
|--|-------------------------------------------|--|--|--|--|--|
|  |                                           |  |  |  |  |  |
|  | <b>Part 1 - Physical characterisation</b> |  |  |  |  |  |
|  | <b>Version: 1.0</b>                       |  |  |  |  |  |

| Product                | Batch  | Replicate | Strength | D[v,0.1] µm | D[v,0.5] µm | D[v,0.9] µm |
|------------------------|--------|-----------|----------|-------------|-------------|-------------|
| Pankreatan             | 323101 | 3         | 25k      | 2345.23     | 2613.65     | 2882.07     |
| Pankreatin             | 672401 | 1         | 40k      | 1914.57     | 2511.86     | 3351.17     |
| Pankreatin             | 672401 | 2         | 40k      | 1914.29     | 2548.95     | 3450.36     |
| Pankreatin             | 672401 | 3         | 40k      | 1897.94     | 2496.49     | 3443.96     |
| Pankreatin Laves Mikro | 012501 | 1         | 10k      | 1460.04     | 1964.66     | 2667.34     |
| Pankreatin Laves Mikro | 012501 | 2         | 10k      | 1476.47     | 2004.41     | 2680.66     |
| Pankreatin Laves Mikro | 012501 | 3         | 10k      | 1465.24     | 1968.65     | 2654.19     |
| Pankreatin Laves Mikro | 319301 | 1         | 20k      | 2341.00     | 2611.30     | 2881.60     |
| Pankreatin Laves Mikro | 319301 | 2         | 20k      | 2342.56     | 2612.17     | 2881.78     |
| Pankreatin Laves Mikro | 319301 | 3         | 20k      | 2337.48     | 2609.35     | 2881.21     |
| Pankreatin Mikro       | 321401 | 1         | 20k      | 2348.44     | 2622.60     | 2896.76     |
| Pankreatin Mikro       | 321401 | 2         | 20k      | 2335.92     | 2608.48     | 2881.04     |
| Pankreatin Mikro       | 321401 | 3         | 20k      | 2344.82     | 2622.13     | 2899.43     |
| Pankreatin Stada       | 92238  | 1         | 20k      | 2338.89     | 2610.13     | 2881.37     |
| Pankreatin Stada       | 92238  | 2         | 20k      | 2344.23     | 2613.10     | 2881.96     |
| Pankreatin Stada       | 92238  | 3         | 20k      | 2342.91     | 2612.36     | 2881.82     |
| Panzytrat              | 337801 | 1         | 10k      | 2347.14     | 2614.71     | 2882.29     |
| Panzytrat              | 337801 | 2         | 10k      | 2337.47     | 2609.34     | 2881.21     |
| Panzytrat              | 337801 | 3         | 10k      | 2343.10     | 2619.83     | 2896.56     |
| Panzytrat              | 412801 | 1         | 25k      | 2343.21     | 2612.53     | 2881.85     |
| Panzytrat              | 412801 | 2         | 25k      | 2347.79     | 2615.07     | 2882.36     |
| Panzytrat              | 412801 | 3         | 25k      | 2344.58     | 2613.29     | 2882.00     |
| Panzytrat              | 670501 | 1         | 40k      | 1938.21     | 2592.85     | 3588.91     |
| Panzytrat              | 670501 | 2         | 40k      | 1937.58     | 2573.55     | 3425.20     |
| Panzytrat              | 670501 | 3         | 40k      | 1944.12     | 2571.90     | 3412.86     |
| Panzytrat              | 413201 | 1         | 25k      | 2349.33     | 2615.93     | 2882.53     |
| Panzytrat              | 413201 | 3         | 25k      | 2337.46     | 2609.33     | 2881.21     |
| Panzytrat              | 413201 | 2         | 25k      | 2336.14     | 2615.57     | 2895.01     |
| Panzytrat              | 358001 | 1         | 20k      | 2342.07     | 2611.90     | 2881.72     |
| Panzytrat              | 358001 | 2         | 20k      | 2347.32     | 2620.84     | 2894.36     |
| Panzytrat              | 358001 | 3         | 20k      | 2340.82     | 2611.20     | 2881.58     |

Table S7. Replicate data for Feret Min

| Product | Batch | Replicate | Strength | D[v,0.1] µm | D[v,0.5] µm | D[v,0.9] µm |
|---------|-------|-----------|----------|-------------|-------------|-------------|
| Creon   | 57797 | 1         | 10k      | 861.98      | 1035.72     | 1486.67     |
| Creon   | 57797 | 2         | 10k      | 860.34      | 1029.74     | 1365.63     |
| Creon   | 57797 | 3         | 10k      | 867.88      | 1059.07     | 1491.40     |

|  |                                           |
|--|-------------------------------------------|
|  |                                           |
|  | <b>Part 1 - Physical characterisation</b> |
|  | <b>Version: 1.0</b>                       |

| Product          | Batch  | Replicate | Strength | D[v,0.1] µm | D[v,0.5] µm | D[v,0.9] µm |
|------------------|--------|-----------|----------|-------------|-------------|-------------|
| Creon            | 58259  | 1         | 25k      | 857.12      | 996.47      | 1385.44     |
| Creon            | 58259  | 2         | 25k      | 855.63      | 989.74      | 1348.37     |
| Creon            | 58259  | 3         | 25k      | 857.95      | 999.11      | 1430.75     |
| Panzytrat        | 337801 | 1         | 10k      | 1824.81     | 2030.36     | 2235.91     |
| Panzytrat        | 337801 | 2         | 10k      | 1825.00     | 2030.47     | 2235.94     |
| Panzytrat        | 337801 | 3         | 10k      | 1825.63     | 2032.38     | 2239.14     |
| Panzytrat        | 412801 | 1         | 25k      | 1824.44     | 2030.16     | 2235.87     |
| Panzytrat        | 412801 | 2         | 25k      | 1824.49     | 2030.19     | 2235.88     |
| Panzytrat        | 412801 | 3         | 25k      | 1824.78     | 2030.35     | 2235.91     |
| Panzytrat        | 670501 | 1         | 40k      | 1438.25     | 1699.44     | 2164.04     |
| Panzytrat        | 670501 | 2         | 40k      | 1444.10     | 1736.93     | 2183.64     |
| Panzytrat        | 670501 | 3         | 40k      | 1441.53     | 1719.23     | 2165.41     |
| Pangrol          | 84231E | 1         | 25k      | 1815.96     | 2028.28     | 2240.60     |
| Pangrol          | 84231E | 2         | 25k      | 1817.96     | 2029.57     | 2241.18     |
| Pangrol          | 84231E | 3         | 25k      | 1825.24     | 2033.01     | 2240.78     |
| Pangrol          | 92019  | 1         | 40k      | 1443.18     | 1721.27     | 2173.93     |
| Pangrol          | 92019  | 2         | 40k      | 1435.20     | 1677.85     | 2137.01     |
| Pangrol          | 92019  | 3         | 40k      | 1433.27     | 1690.55     | 2148.68     |
| Pangrol          | 83147D | 1         | 10k      | 1825.20     | 2030.58     | 2235.96     |
| Pangrol          | 83147D | 2         | 10k      | 1825.29     | 2030.63     | 2235.97     |
| Pangrol          | 83147D | 3         | 10k      | 1824.78     | 2030.35     | 2235.91     |
| Pankreatin Mikro | 321401 | 1         | 20k      | 1824.92     | 2031.97     | 2239.02     |
| Pankreatin Mikro | 321401 | 2         | 20k      | 1824.49     | 2030.18     | 2235.88     |
| Pankreatin Mikro | 321401 | 3         | 20k      | 1824.77     | 2031.77     | 2238.76     |
| Cotazym          | 507401 | 1         | 20k      | 1445.66     | 1738.72     | 2180.56     |
| Cotazym          | 507401 | 2         | 20k      | 1451.10     | 1759.13     | 2187.04     |
| Cotazym          | 507401 | 3         | 20k      | 1461.85     | 1815.65     | 2192.97     |
| Ozym             | N001   | 1         | 20k      | 1824.51     | 2031.39     | 2238.26     |
| Ozym             | N001   | 2         | 20k      | 1824.52     | 2030.20     | 2235.88     |
| Ozym             | N001   | 3         | 20k      | 1824.65     | 2030.27     | 2235.90     |
| Lipancrea        | 011119 | 1         | 8k       | 1114.32     | 1320.16     | 1709.64     |
| Lipancrea        | 011119 | 2         | 8k       | 1111.45     | 1313.92     | 1707.51     |
| Lipancrea        | 011119 | 3         | 8k       | 1113.20     | 1317.21     | 1692.43     |
| Creon            | 58519  | 1         | 10k      | 848.30      | 1047.31     | 1369.46     |
| Creon            | 58519  | 2         | 10k      | 849.11      | 1032.20     | 1374.81     |
| Creon            | 58519  | 3         | 10k      | 850.30      | 1048.52     | 1377.53     |
| Creon            | 58888  | 1         | 25k      | 897.83      | 1158.57     | 1356.40     |

|  |                                           |
|--|-------------------------------------------|
|  |                                           |
|  | <b>Part 1 - Physical characterisation</b> |
|  | <b>Version: 1.0</b>                       |

| Product                | Batch  | Replicate | Strength | D[v,0.1] µm | D[v,0.5] µm | D[v,0.9] µm |
|------------------------|--------|-----------|----------|-------------|-------------|-------------|
| Creon                  | 58888  | 2         | 25k      | 888.28      | 1142.88     | 1354.42     |
| Creon                  | 58888  | 3         | 25k      | 894.52      | 1155.04     | 1357.05     |
| Panzytrat              | 413201 | 1         | 25k      | 1825.29     | 2030.63     | 2235.97     |
| Panzytrat              | 413201 | 3         | 25k      | 1822.74     | 2029.21     | 2235.68     |
| Pankreatin Stada       | 92238  | 1         | 20k      | 1821.14     | 2028.32     | 2235.51     |
| Pankreatin Stada       | 92238  | 2         | 20k      | 1824.39     | 2030.13     | 2235.87     |
| Pankreatin Stada       | 92238  | 3         | 20k      | 1824.30     | 2030.08     | 2235.86     |
| Pankreatan             | 321301 | 1         | 10k      | 1821.23     | 2028.37     | 2235.52     |
| Pankreatan             | 321301 | 2         | 10k      | 1823.75     | 2029.77     | 2235.80     |
| Pankreatan             | 321301 | 3         | 10k      | 1822.47     | 2029.06     | 2235.65     |
| Pankreatan             | 501201 | 1         | 20k      | 1824.22     | 2030.03     | 2235.85     |
| Pankreatan             | 501201 | 2         | 20k      | 1825.02     | 2030.48     | 2235.94     |
| Pankreatan             | 501201 | 3         | 20k      | 1825.29     | 2030.63     | 2235.97     |
| Pankreatan             | 323101 | 1         | 25k      | 1823.47     | 2029.62     | 2235.77     |
| Pankreatan             | 323101 | 2         | 25k      | 1823.46     | 2029.61     | 2235.76     |
| Pankreatan             | 323101 | 3         | 25k      | 1825.08     | 2030.51     | 2235.94     |
| Pankreatin Laves Mikro | 012501 | 1         | 10k      | 1096.71     | 1250.54     | 1552.63     |
| Pankreatin Laves Mikro | 012501 | 2         | 10k      | 1097.69     | 1259.48     | 1597.66     |
| Pankreatin Laves Mikro | 012501 | 3         | 10k      | 1095.94     | 1249.99     | 1561.61     |
| Pankreatin Laves Mikro | 319301 | 1         | 20k      | 1823.77     | 2029.79     | 2235.80     |
| Pankreatin Laves Mikro | 319301 | 2         | 20k      | 1825.29     | 2030.63     | 2235.97     |
| Pankreatin Laves Mikro | 319301 | 3         | 20k      | 1824.84     | 2030.38     | 2235.92     |
| Pankreatin             | 672401 | 1         | 40k      | 1431.17     | 1676.76     | 2146.68     |
| Pankreatin             | 672401 | 2         | 40k      | 1428.04     | 1680.03     | 2150.02     |
| Pankreatin             | 672401 | 3         | 40k      | 1431.66     | 1684.62     | 2152.17     |
| Ozym                   | N002   | 1         | 40k      | 1444.70     | 1742.58     | 2175.18     |
| Ozym                   | N002   | 2         | 40k      | 1443.19     | 1747.28     | 2176.88     |
| Ozym                   | N002   | 3         | 40k      | 1449.07     | 1753.02     | 2185.12     |
| Cotazym                | 507701 | 1         | 30k      | 1439.60     | 1725.70     | 2168.62     |
| Cotazym                | 507701 | 2         | 30k      | 1442.17     | 1727.98     | 2169.47     |
| Cotazym                | 507701 | 3         | 30k      | 1440.89     | 1708.92     | 2167.47     |
| Cotazym                | 659101 | 1         | 40k      | 1427.14     | 1658.88     | 2116.96     |
| Cotazym                | 659101 | 2         | 40k      | 1421.81     | 1651.16     | 2107.71     |
| Cotazym                | 659101 | 3         | 40k      | 1426.07     | 1657.03     | 2123.62     |
| Panzytrat              | 413201 | 2         | 25k      | 1825.32     | 2032.31     | 2239.30     |
| Creon                  | 57234  | 1         | 10k      | 851.88      | 979.34      | 1316.03     |
| Creon                  | 57234  | 2         | 10k      | 857.62      | 999.05      | 1440.88     |



|  |                                           |  |  |  |  |  |
|--|-------------------------------------------|--|--|--|--|--|
|  |                                           |  |  |  |  |  |
|  | <b>Part 1 - Physical characterisation</b> |  |  |  |  |  |
|  | <b>Version: 1.0</b>                       |  |  |  |  |  |

| Product   | Batch  | Replicate | Strength | D[v,0.1] µm | D[v,0.5] µm | D[v,0.9] µm |
|-----------|--------|-----------|----------|-------------|-------------|-------------|
| Creon     | 57234  | 3         | 10k      | 857.54      | 1004.92     | 1556.47     |
| Creon     | 58845  | 1         | 20k      | 909.81      | 1176.49     | 1360.56     |
| Creon     | 58845  | 2         | 20k      | 908.68      | 1176.30     | 1363.63     |
| Creon     | 58845  | 3         | 20k      | 906.88      | 1174.06     | 1363.32     |
| Creon     | 57467  | 1         | 25k      | 932.82      | 1197.04     | 1374.68     |
| Creon     | 57467  | 2         | 25k      | 933.24      | 1201.32     | 1431.66     |
| Creon     | 57467  | 3         | 25k      | 918.93      | 1189.14     | 1371.04     |
| Creon     | 59016  | 1         | 35k      | 867.11      | 1047.99     | 1359.15     |
| Creon     | 59016  | 2         | 35k      | 862.21      | 1027.62     | 1352.79     |
| Creon     | 59016  | 3         | 35k      | 867.89      | 1046.97     | 1357.79     |
| Pangrol   | 93255H | 1         | 25k      | 1825.29     | 2030.63     | 2235.97     |
| Pangrol   | 93255H | 2         | 25k      | 1823.68     | 2029.73     | 2235.79     |
| Pangrol   | 93255H | 3         | 25k      | 1824.19     | 2031.35     | 2238.51     |
| Pangrol   | 94166E | 1         | 10k      | 1827.33     | 2046.22     | 2265.11     |
| Pangrol   | 94166E | 2         | 10k      | 1824.31     | 2036.67     | 2249.04     |
| Pangrol   | 94166E | 3         | 10k      | 1826.97     | 2039.13     | 2251.30     |
| Panzytrat | 358001 | 1         | 20k      | 1825.29     | 2030.63     | 2235.97     |
| Panzytrat | 358001 | 2         | 20k      | 1825.59     | 2032.09     | 2238.59     |
| Panzytrat | 358001 | 3         | 20k      | 1825.54     | 2031.87     | 2238.19     |
| Creon     | 59042  | 1         | 5K       | 846.44      | 948.28      | 1050.12     |
| Creon     | 59042  | 2         | 5K       | 846.10      | 946.50      | 1046.91     |
| Creon     | 59042  | 3         | 5K       | 846.53      | 947.79      | 1049.05     |

Table S8. Replicate data for EQPC

| Product | Batch  | Replicate | Strength | D[v,0.1] µm | D[v,0.5] µm | D[v,0.9] µm |
|---------|--------|-----------|----------|-------------|-------------|-------------|
| Cotazym | 507401 | 1         | 20k      | 1774.54     | 2082.52     | 2666.37     |
| Cotazym | 507401 | 2         | 20k      | 1791.96     | 2095.71     | 2681.96     |
| Cotazym | 507401 | 3         | 20k      | 1798.66     | 2102.17     | 2690.66     |
| Cotazym | 507701 | 1         | 30k      | 1787.86     | 2095.31     | 2684.65     |
| Cotazym | 507701 | 2         | 30k      | 1783.66     | 2090.23     | 2676.65     |
| Cotazym | 507701 | 3         | 30k      | 1766.56     | 2057.66     | 2576.77     |
| Cotazym | 659101 | 1         | 40k      | 1655.52     | 2035.54     | 2518.71     |
| Cotazym | 659101 | 2         | 40k      | 1605.20     | 2032.01     | 2560.25     |
| Cotazym | 659101 | 3         | 40k      | 1717.75     | 2051.20     | 2565.55     |
| Creon   | 57797  | 1         | 10k      | 956.20      | 1259.80     | 1701.76     |
| Creon   | 57797  | 2         | 10k      | 946.79      | 1244.98     | 1671.44     |
| Creon   | 57797  | 3         | 10k      | 979.27      | 1275.35     | 1725.99     |

|  |                                           |
|--|-------------------------------------------|
|  |                                           |
|  | <b>Part 1 - Physical characterisation</b> |
|  | <b>Version: 1.0</b>                       |

| Product  | Batch  | Replicate | Strength | D[v,0.1] µm | D[v,0.5] µm | D[v,0.9] µm |
|----------|--------|-----------|----------|-------------|-------------|-------------|
| Creon    | 58259  | 1         | 25k      | 942.25      | 1226.25     | 1652.63     |
| Creon    | 58259  | 2         | 25k      | 943.28      | 1221.50     | 1601.31     |
| Creon    | 58259  | 3         | 25k      | 948.65      | 1242.06     | 1655.40     |
| Creon    | 58519  | 1         | 10k      | 924.10      | 1232.91     | 1677.12     |
| Creon    | 58519  | 2         | 10k      | 928.04      | 1234.98     | 1675.20     |
| Creon    | 58519  | 3         | 10k      | 922.13      | 1238.03     | 1706.46     |
| Creon    | 58888  | 1         | 25k      | 1071.32     | 1366.61     | 1707.25     |
| Creon    | 58888  | 2         | 25k      | 1038.04     | 1346.82     | 1703.92     |
| Creon    | 58888  | 3         | 25k      | 1068.54     | 1350.73     | 1713.46     |
| Creon    | 57234  | 1         | 10k      | 923.21      | 1207.19     | 1583.43     |
| Creon    | 57234  | 2         | 10k      | 937.82      | 1232.17     | 1656.09     |
| Creon    | 57234  | 3         | 10k      | 935.22      | 1241.39     | 1693.37     |
| Creon    | 58845  | 1         | 20k      | 1069.97     | 1347.55     | 1713.67     |
| Creon    | 58845  | 2         | 20k      | 1068.04     | 1329.75     | 1710.29     |
| Creon    | 58845  | 3         | 20k      | 1067.38     | 1342.22     | 1725.23     |
| Creon    | 57467  | 1         | 25k      | 1072.40     | 1346.81     | 1736.97     |
| Creon    | 57467  | 2         | 25k      | 1077.80     | 1360.03     | 1747.07     |
| Creon    | 57467  | 3         | 25k      | 1064.21     | 1343.81     | 1725.93     |
| Creon    | 59016  | 1         | 35k      | 981.72      | 1262.39     | 1680.50     |
| Creon    | 59016  | 2         | 35k      | 958.12      | 1247.52     | 1665.56     |
| Creon    | 59016  | 3         | 35k      | 989.12      | 1267.49     | 1681.69     |
| Creon    | 59042  | 1         | 5K       | 911.80      | 1178.83     | 1410.48     |
| Creon    | 59042  | 2         | 5K       | 912.41      | 1174.85     | 1368.47     |
| Creon    | 59042  | 3         | 5K       | 911.57      | 1175.98     | 1372.30     |
| Lipancia | 011119 | 1         | 8k       | 1378.55     | 1652.34     | 2128.03     |
| Lipancia | 011119 | 2         | 8k       | 1379.62     | 1647.37     | 2127.54     |
| Lipancia | 011119 | 3         | 8k       | 1361.87     | 1640.00     | 2115.91     |
| Ozym     | N001   | 1         | 20k      | 1865.02     | 2233.17     | 2799.16     |
| Ozym     | N001   | 2         | 20k      | 1867.95     | 2244.15     | 2803.43     |
| Ozym     | N001   | 3         | 20k      | 1858.88     | 2206.49     | 2786.56     |
| Ozym     | N002   | 1         | 40k      | 1761.75     | 2070.93     | 2635.17     |
| Ozym     | N002   | 2         | 40k      | 1774.84     | 2080.25     | 2659.92     |
| Ozym     | N002   | 3         | 40k      | 1780.40     | 2054.17     | 2550.84     |
| Pangrol  | 84231E | 1         | 25k      | 2321.65     | 2600.55     | 2879.45     |
| Pangrol  | 84231E | 2         | 25k      | 2325.05     | 2602.44     | 2879.83     |
| Pangrol  | 84231E | 3         | 25k      | 2341.88     | 2617.76     | 2893.64     |
| Pangrol  | 92019  | 1         | 40k      | 1794.19     | 2090.46     | 2666.61     |

|  |                                           |
|--|-------------------------------------------|
|  |                                           |
|  | <b>Part 1 - Physical characterisation</b> |
|  | <b>Version: 1.0</b>                       |

| Product                | Batch  | Replicate | Strength | D[v,0.1] µm | D[v,0.5] µm | D[v,0.9] µm |
|------------------------|--------|-----------|----------|-------------|-------------|-------------|
| Pangrol                | 92019  | 2         | 40k      | 1694.24     | 2076.99     | 2672.98     |
| Pangrol                | 92019  | 3         | 40k      | 1793.48     | 2067.15     | 2577.82     |
| Pangrol                | 83147D | 1         | 10k      | 2347.00     | 2614.63     | 2882.27     |
| Pangrol                | 83147D | 2         | 10k      | 2334.06     | 2607.44     | 2880.83     |
| Pangrol                | 83147D | 3         | 10k      | 2343.94     | 2612.93     | 2881.93     |
| Pangrol                | 93255H | 1         | 25k      | 2346.56     | 2614.39     | 2882.22     |
| Pangrol                | 93255H | 2         | 25k      | 2342.14     | 2611.93     | 2881.73     |
| Pangrol                | 93255H | 3         | 25k      | 2342.53     | 2612.16     | 2881.78     |
| Pangrol                | 94166E | 1         | 10k      | 2353.20     | 2632.20     | 2911.21     |
| Pangrol                | 94166E | 2         | 10k      | 2340.34     | 2617.10     | 2893.86     |
| Pangrol                | 94166E | 3         | 10k      | 2343.53     | 2616.75     | 2889.97     |
| Pankreatan             | 321301 | 1         | 10k      | 1874.02     | 2290.60     | 2817.46     |
| Pankreatan             | 321301 | 2         | 10k      | 1870.95     | 2267.90     | 2811.42     |
| Pankreatan             | 321301 | 3         | 10k      | 1872.29     | 2271.57     | 2812.50     |
| Pankreatan             | 501201 | 1         | 20k      | 1869.85     | 2260.58     | 2809.14     |
| Pankreatan             | 501201 | 2         | 20k      | 1864.55     | 2230.42     | 2798.00     |
| Pankreatan             | 501201 | 3         | 20k      | 1863.56     | 2222.05     | 2794.24     |
| Pankreatan             | 323101 | 1         | 25k      | 1853.12     | 2181.88     | 2771.13     |
| Pankreatan             | 323101 | 2         | 25k      | 1859.65     | 2214.62     | 2790.87     |
| Pankreatan             | 323101 | 3         | 25k      | 1861.79     | 2215.12     | 2790.94     |
| Pankreatin             | 672401 | 1         | 40k      | 1756.36     | 2046.76     | 2511.43     |
| Pankreatin             | 672401 | 2         | 40k      | 1706.55     | 2067.11     | 2638.60     |
| Pankreatin             | 672401 | 3         | 40k      | 1694.89     | 2037.54     | 2485.52     |
| Pankreatin Laves Mikro | 012501 | 1         | 10k      | 1247.24     | 1573.18     | 1966.33     |
| Pankreatin Laves Mikro | 012501 | 2         | 10k      | 1267.31     | 1588.06     | 2018.81     |
| Pankreatin Laves Mikro | 012501 | 3         | 10k      | 1251.74     | 1575.55     | 1969.36     |
| Pankreatin Laves Mikro | 319301 | 1         | 20k      | 1844.17     | 2130.98     | 2714.45     |
| Pankreatin Laves Mikro | 319301 | 2         | 20k      | 1850.86     | 2158.49     | 2750.13     |
| Pankreatin Laves Mikro | 319301 | 3         | 20k      | 1846.93     | 2144.09     | 2733.74     |
| Pankreatin Mikro       | 321401 | 1         | 20k      | 1876.58     | 2301.05     | 2832.34     |
| Pankreatin Mikro       | 321401 | 2         | 20k      | 1864.10     | 2235.43     | 2800.15     |
| Pankreatin Mikro       | 321401 | 3         | 20k      | 1870.98     | 2269.81     | 2825.48     |
| Pankreatin Stada       | 92238  | 1         | 20k      | 1862.05     | 2255.45     | 2807.64     |
| Pankreatin Stada       | 92238  | 2         | 20k      | 1866.25     | 2238.61     | 2801.34     |
| Pankreatin Stada       | 92238  | 3         | 20k      | 1864.71     | 2232.63     | 2798.94     |
| Panzytrat              | 337801 | 1         | 10k      | 1866.24     | 2241.58     | 2802.51     |
| Panzytrat              | 337801 | 2         | 10k      | 1865.88     | 2237.23     | 2800.80     |

|  |                                           |
|--|-------------------------------------------|
|  |                                           |
|  | <b>Part 1 - Physical characterisation</b> |
|  | <b>Version: 1.0</b>                       |

| Product   | Batch  | Replicate | Strength | D[v,0.1] $\mu\text{m}$ | D[v,0.5] $\mu\text{m}$ | D[v,0.9] $\mu\text{m}$ |
|-----------|--------|-----------|----------|------------------------|------------------------|------------------------|
| Panzytrat | 337801 | 3         | 10k      | 1861.15                | 2210.12                | 2804.03                |
| Panzytrat | 412801 | 1         | 25k      | 1860.99                | 2209.19                | 2787.85                |
| Panzytrat | 412801 | 2         | 25k      | 1860.85                | 2208.49                | 2787.48                |
| Panzytrat | 412801 | 3         | 25k      | 1862.62                | 2224.03                | 2795.24                |
| Panzytrat | 670501 | 1         | 40k      | 1774.31                | 2075.58                | 2664.50                |
| Panzytrat | 670501 | 2         | 40k      | 1796.70                | 2095.69                | 2677.53                |
| Panzytrat | 670501 | 3         | 40k      | 1794.92                | 2094.02                | 2675.13                |
| Panzytrat | 413201 | 1         | 25k      | 1861.01                | 2209.26                | 2787.89                |
| Panzytrat | 413201 | 3         | 25k      | 1857.61                | 2214.32                | 2790.89                |
| Panzytrat | 413201 | 2         | 25k      | 1861.58                | 2215.70                | 2806.29                |
| Panzytrat | 358001 | 1         | 20k      | 1859.95                | 2203.91                | 2784.95                |
| Panzytrat | 358001 | 2         | 20k      | 1864.10                | 2224.68                | 2808.46                |
| Panzytrat | 358001 | 3         | 20k      | 1861.64                | 2212.39                | 2789.52                |

|                                                             |
|-------------------------------------------------------------|
| <b>MYLAN GLOBAL RESPIRATORY GROUP</b>                       |
|                                                             |
| <b>Part 2 - Enzyme Activity and Enzyme Release Kinetics</b> |

## **Part 2 - Enzyme Activity and Enzyme Release Kinetics of Kreon and its German Competitor Products**

**Disclaimer: Confidential, personal or proprietary  
information and proprietary images have been  
redacted from the original report.**

|                                                             |
|-------------------------------------------------------------|
|                                                             |
|                                                             |
| <b>Part 2 - Enzyme Activity and Enzyme Release Kinetics</b> |

## Table of Contents

|                                                                      |           |
|----------------------------------------------------------------------|-----------|
| <b>1. Aim &amp; Introduction .....</b>                               | <b>4</b>  |
| <b>2. Activity &amp; Sample Categories .....</b>                     | <b>5</b>  |
| <b>3. Methodology .....</b>                                          | <b>5</b>  |
| <b>4. Procedure .....</b>                                            | <b>6</b>  |
| <b>5. Acceptance Criteria &amp; Aberrant Data Investigation.....</b> | <b>7</b>  |
| <b>6. Results.....</b>                                               | <b>11</b> |
| <b>7. Version history .....</b>                                      | <b>52</b> |
| <b>Appendix 1 – Sample Details .....</b>                             | <b>53</b> |

|                                                             |
|-------------------------------------------------------------|
|                                                             |
|                                                             |
| <b>Part 2 - Enzyme Activity and Enzyme Release Kinetics</b> |

## List of Tables

|                                                                                                              |    |
|--------------------------------------------------------------------------------------------------------------|----|
| Table S1: Methods used for analysis .....                                                                    | 5  |
| Table S2: Replicates and determinations performed for each method .....                                      | 6  |
| Table S3: Lipase Activity: Analysis Repeated .....                                                           | 8  |
| Table S4: Amylase Activity: Analysis Repeated.....                                                           | 8  |
| Table S5: Protease Activity: Analysis Repeated.....                                                          | 10 |
| Table S6: Enzyme Release Kinetics: Analysis Repeated.....                                                    | 10 |
| Table S7: Lipase Activity Reported Results .....                                                             | 11 |
| Table S8: Amylase Activity Reported Results .....                                                            | 16 |
| Table S9: Total Protease Activity Reported Results.....                                                      | 21 |
| Table S10: Enzyme Release Kinetics Reported Results (Residual Lipase Activity / Ph.Eur.-units) .....         | 26 |
| Table S11: Enzyme Release Kinetics Reported Results (Residual Lipase Activity as % of Lipase Activity) ..... | 36 |

## List of Figures

|                                                                                                                                      |    |
|--------------------------------------------------------------------------------------------------------------------------------------|----|
| Figure S1: Lipase Activity as % of Label Claim.....                                                                                  | 15 |
| Figure S2: Amylase Activity as % of Label Claim .....                                                                                | 20 |
| Figure S3: Protease Activity as % Label Claim.....                                                                                   | 25 |
| Figure S4: Residual Lipase Activity (as % Lipase Activity) vs Time-Point - pH Test = 1 to 6.....                                     | 46 |
| Figure S5: Residual Lipase Activity (as % Lipase Activity) vs Time-Point - pH Test = 4 to 6.....                                     | 47 |
| Figure S6: Residual Lipase Activity (as % Lipase Activity) vs Time-Point - pH Test = 5 to 6.....                                     | 48 |
| Figure S7: Residual Lipase Activity (as % of Lipase Activity) vs Time (mins) - pH Test = 1 to 6 Grouped by Individual Strength ..... | 49 |
| Figure S8: Residual Lipase Activity (as % of Lipase Activity) vs Time (mins) - pH Test = 4 to 6 Grouped by Individual Strength ..... | 50 |
| Figure S9: Residual Lipase Activity (as % of Lipase Activity) vs Time (mins) - pH Test = 5 to 6 Grouped by Individual Strength ..... | 51 |

|                                                             |
|-------------------------------------------------------------|
|                                                             |
|                                                             |
| <b>Part 2 - Enzyme Activity and Enzyme Release Kinetics</b> |

## 1. AIM & INTRODUCTION

---

Creon® is a pancreatic enzyme replacement therapy prescribed in response to endocrine pancreatic insufficiency (EPI). This condition is typically a result of cystic fibrosis, pancreatitis, a pancreatectomy or other pancreatic function impacting conditions. The therapy replaces protease, amylase and lipase, enzymes that would otherwise be produced by a healthy pancreas.

The active ingredient in the formulation, pancreatin, is derived from healthy porcine pancreases. In the Creon product pancreatin is formulated into micro pellets, cylindrical in shape, approximately 1mm in diameter and 2mm in length. These pellets are enteric-coated so that the enzymes are released in the duodenum. The final stage of the pellet formulation is to encapsulate them in a gelatine capsule.

In this report, Enzyme (Lipase, Amylase and total Protease) activity and the kinetics of enzyme release of Creon and a number of competitor products were determined to compare their performance in support of ongoing marketing initiatives.

Refer to Part 1: "Physical Characterisation" for size and shape analysis of these products.



|                                                             |
|-------------------------------------------------------------|
|                                                             |
|                                                             |
| <b>Part 2 - Enzyme Activity and Enzyme Release Kinetics</b> |

## 2. ACTIVITY & SAMPLE CATEGORIES

All samples are of GMP origin and were analysed under an Exploratory Development protocol. Refer to Appendix 1 for sample details.

## 3. METHODOLOGY

**Table S1: Methods used for analysis**

| Test                    | Method No.           | Title                                                                                     |
|-------------------------|----------------------|-------------------------------------------------------------------------------------------|
| Lipase activity         | MGR-METH-859065*     | Determination of the lipase activity of pancreas power containing preparations            |
| Amylase activity        | MGR-METH-859066 v1.0 | Determination of the amylase activity of pancreas power containing preparations           |
| Total Protease activity | MGR-METH-859075 v1.0 | Determination of the total proteolytic activity of pancreas power containing preparations |
| Enzyme release kinetics | MGR-METH-859076 v1.0 | Determination of enzyme release kinetics of pancreas power containing preparations        |

\* = v1.0 used for Days 1 to 8 and v2.0 for Day 9 (Mezym F 10K B/N: 98013 and Pangrol 20K B/N: 92027A only). MGR-METH-859065 was updated to include the following changes:

- Section 3.0: Use of bottle top dispensers changed to Autopipettes.
- Section 6.1: Increased standard and sample solution stability from “analyse immediately” to “analyse within 4 hours of preparation”.
- Section 7.1: Added requirement to calibrate the pH probe on the autotitrator to reflect the current practice of calibrating the pH probe daily prior to use.
- Section 7.2: Updated to allow for test sample volume changes to align with Ph.Eur method for Pancreas Powder.
- Section 9.0: Updated to include applicable corrections in lipase activity calculations where test sample volume changes are required.
- Section 11.0: Updated with informal validation reference.

There is no impact on the data for Days 1 to 8 when compared to data for Day 9

|                                                             |
|-------------------------------------------------------------|
|                                                             |
|                                                             |
| <b>Part 2 - Enzyme Activity and Enzyme Release Kinetics</b> |

#### 4. PROCEDURE

The tests listed in Table S1 were performed in the MGRG ACD laboratory (Sandwich, UK) to generate replicate determinations as listed in Table S2 for each sample listed in Appendix 1.

| Test                    | No. of Capsules or Tablets per replicate* | No. of Replicates | Target Enzyme Activity in Weighing | No. of Determinations      |
|-------------------------|-------------------------------------------|-------------------|------------------------------------|----------------------------|
| Lipase Activity         | 20                                        | 1                 | 2500                               | 2 titrations/replicate     |
| Amylase Activity        | 20                                        | 1                 | 3000                               | 2 titrations/replicate     |
| Total Protease Activity | 20                                        | 1                 | 260                                | 3 determinations/replicate |
| Enzyme Release Kinetics | **                                        | 1/condition       | 15000 (Lipase)                     | 1 titration/timepoint      |

\* = For products in pellet form, a minimum of 5g of pellets were weighed.

\*\* = An appropriate number of capsules were used to prepare a bulk sample with 80-100K Lipase units on day of analysis.

|                                                             |
|-------------------------------------------------------------|
|                                                             |
|                                                             |
| <b>Part 2 - Enzyme Activity and Enzyme Release Kinetics</b> |

## 5. ACCEPTANCE CRITERIA & ABERRANT DATA INVESTIGATION

### Acceptance Criteria - Method Performance

Acceptance criteria for method performance were listed within each method and was met for all methods except for the enzyme release kinetics method MGR-METH-859076 v1.0 Section 7: criteria to maintain the temperature of the media in the vessels at  $37^{\circ}\text{C} \pm 1^{\circ}\text{C}$ .

The USP/Ph Eur requirements for temperature control in Disintegration Apparatus is  $37 \pm 2^{\circ}\text{C}$  and is the tolerance defined for the equipment by the equipment manufacturer. During the analyses, the disintegration tester is set to  $37.0^{\circ}\text{C}$ . The temperature readings taken before each sampling timepoint demonstrate that the temperature of the media in the vessels was maintained at the pharmacopeial requirements of  $37^{\circ}\text{C} \pm 2^{\circ}\text{C}$ , rather than  $37^{\circ}\text{C} \pm 1^{\circ}\text{C}$ . The method criteria have been set tighter than the equipment/pharmacopeial requirements. The Disintegration Apparatus temperature settings were maintained throughout the analyses for this protocol, therefore the application of the  $37^{\circ}\text{C} \pm 2^{\circ}\text{C}$  criteria is not considered to have a significant impact on the data and the data are reported.

### Acceptance Criteria - Results

Acceptance criteria for all analyses performed on products is report results.

### Aberrant Data Investigation

Aberrant data were investigated as per Laboratory Investigations SOP-000551991 for an exploratory development activity on a sample of GMP origin.

|                                                             |
|-------------------------------------------------------------|
|                                                             |
|                                                             |
| <b>Part 2 - Enzyme Activity and Enzyme Release Kinetics</b> |

**Table S3: Lipase Activity: Analysis Repeated**

| Supplier | Product   | Strength (Lipase) | Batch  |
|----------|-----------|-------------------|--------|
| Abbott   | Kreon     | 5K                | 59042  |
| Allergan | Panzytrat | 10K               | 337801 |
| Allergan | Panzytrat | 20K               | 358001 |

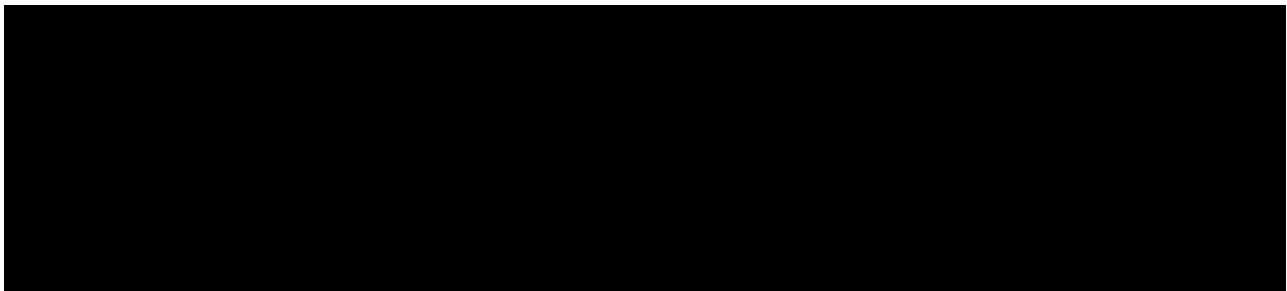

**Table S4: Amylase Activity: Analysis Repeated**

| Supplier         | Product   | Strength (Lipase) | Batch  |
|------------------|-----------|-------------------|--------|
| Abbott           | Kreon     | 10K               | 58519  |
| Abbott           | Kreon     | 20K               | 58845  |
| Abbott           | Kreon     | 35K               | 59016  |
| Berlin-Chemie AG | Pangrol   | 40K               | 92019  |
| Allergan         | Panzytrat | 40K               | 670501 |
| Abbott           | Kreon     | 5K                | 59042  |

|                                                            |
|------------------------------------------------------------|
|                                                            |
|                                                            |
| <b>Part 2- Enzyme Activity and Enzyme Release Kinetics</b> |

| Supplier | Product    | Strength<br>(Lipase) | Batch  |
|----------|------------|----------------------|--------|
| Nordmark | Pankreatin | 40K                  | 672401 |

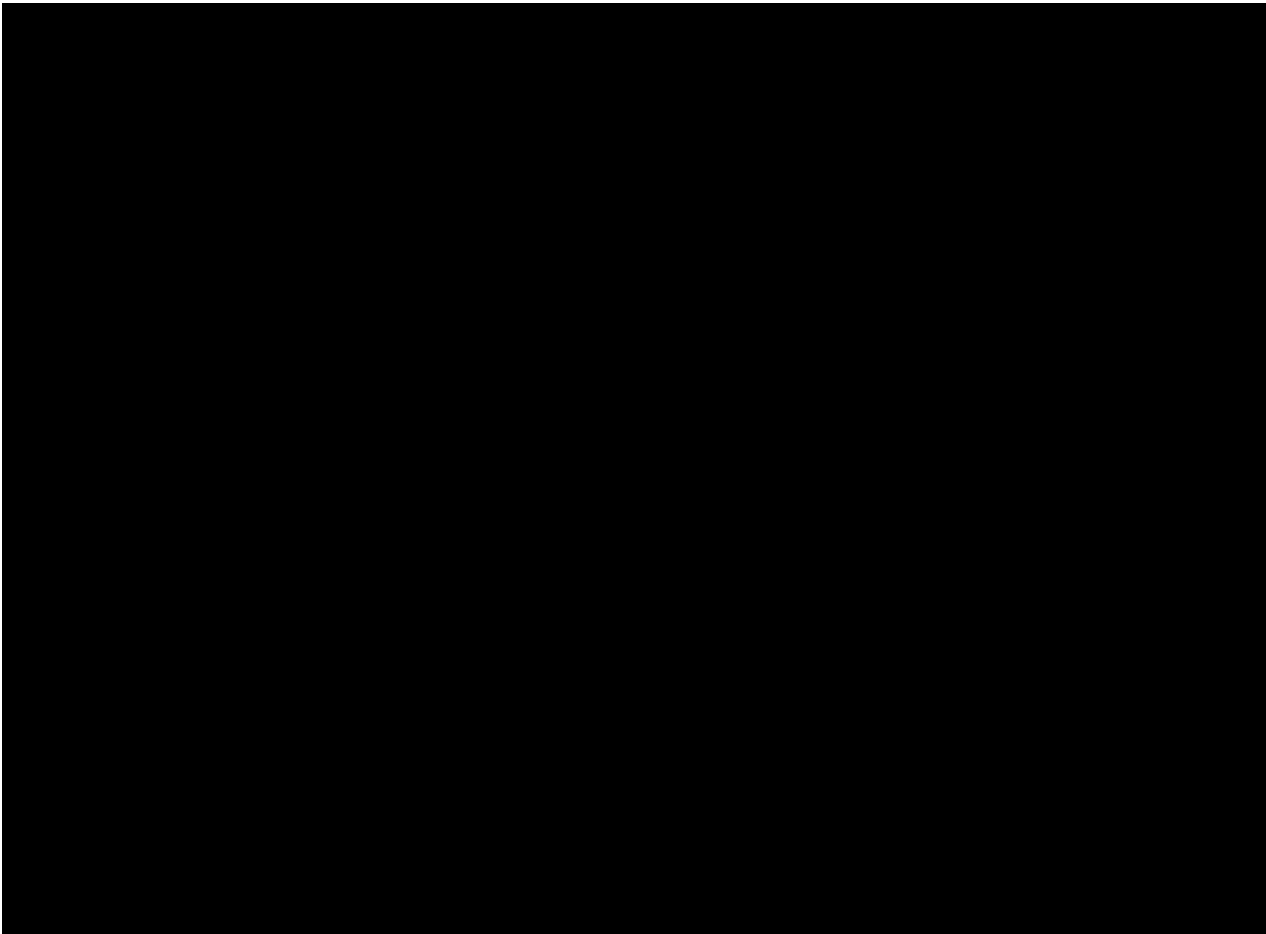

|                                                             |
|-------------------------------------------------------------|
|                                                             |
|                                                             |
| <b>Part 2 - Enzyme Activity and Enzyme Release Kinetics</b> |

**Table S5: Protease Activity: Analysis Repeated**

| Supplier    | Product | Strength (Lipase) | Batch  |
|-------------|---------|-------------------|--------|
| Abbott      | Kreon   | 25K               | 58888  |
| Trommsdorff | Ozym    | 40K               | N002   |
| Cheplapharm | Cotazym | 20K               | 507401 |

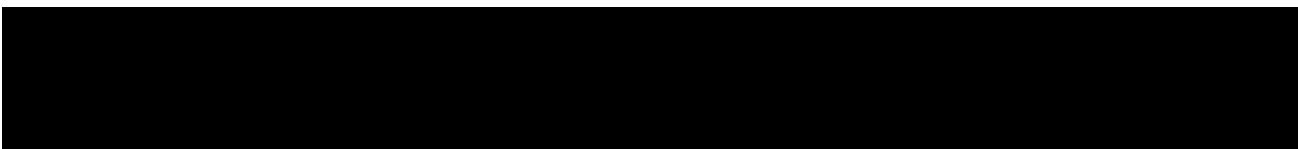

**Table S6: Enzyme Release Kinetics: Analysis Repeated**

| Supplier | Product   | Strength (Lipase) | Batch  |
|----------|-----------|-------------------|--------|
| Allergan | Panzytrat | 25K               | 413201 |

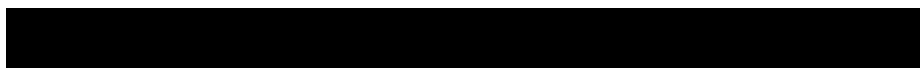

## Part 2 - Enzyme Activity and Enzyme Release Kinetics

### 6. RESULTS

Results for all tests are reported as described in each method.

**Table S7: Lipase Activity Reported Results**

| Supplier | Product | Strength (Lipase) | Batch | Expiry | Labelled Lipase Activity / Dose Unit | Lipase Assay / Actual Activity per gram | Lipase Assay / Unit Dose | Lipase % of Label Claim |
|----------|---------|-------------------|-------|--------|--------------------------------------|-----------------------------------------|--------------------------|-------------------------|
| Abbott   | Kreon   | 5K                | 59042 | Nov-22 | 5000                                 | 52867                                   | 5287                     | 105.7                   |
| Abbott   | Kreon   | 10K               | 58519 | Oct-21 | 10000                                | 43907                                   | 11037                    | 110.4                   |
| Abbott   | Kreon   | 20K               | 58845 | Dec-21 | 20000                                | 42792                                   | 20368                    | 101.8                   |
| Abbott   | Kreon   | 25K               | 58888 | Jan-22 | 25000                                | 50795                                   | 24785                    | 99.1                    |
| Abbott   | Kreon   | 35K               | 59016 | Dec-21 | 35000                                | 52652                                   | 37101                    | 106.0                   |

|                                                             |
|-------------------------------------------------------------|
|                                                             |
|                                                             |
| <b>Part 2 - Enzyme Activity and Enzyme Release Kinetics</b> |

| Supplier         | Product   | Strength (Lipase) | Batch  | Expiry | Labelled Lipase Activity / Dose Unit | Lipase Assay / Actual Activity per gram | Lipase Assay / Unit Dose | Lipase % of Label Claim |
|------------------|-----------|-------------------|--------|--------|--------------------------------------|-----------------------------------------|--------------------------|-------------------------|
| Allergan         | Panzytrat | 10K               | 337801 | Jan-21 | 10000                                | 61923                                   | 12583                    | 125.8                   |
| Allergan         | Panzytrat | 20K               | 358001 | Oct-22 | 20000                                | 66708                                   | 29615                    | 148.1                   |
| Allergan         | Panzytrat | 25K               | 413201 | Aug-21 | 25000                                | 75995                                   | 27929                    | 111.7                   |
| Allergan         | Panzytrat | 40K               | 670501 | May-22 | 40000                                | 87936                                   | 44413                    | 111.0                   |
| Berlin-Chemie AG | Mezym     | 10K               | 98013  | Mar-22 | 10000                                | 34640                                   | 11466                    | 114.7                   |
| Berlin-Chemie AG | Pangrol   | 10K               | 94166E | Nov-21 | 10000                                | 62749                                   | 12444                    | 124.4                   |
| Berlin-Chemie AG | Pangrol   | 20K               | 92027A | May-22 | 20000                                | 44054                                   | 20900                    | 104.5                   |
| Berlin-Chemie AG | Pangrol   | 25K               | 93255H | Sep-21 | 25000                                | 66124                                   | 29268                    | 117.1                   |



|                                                             |
|-------------------------------------------------------------|
|                                                             |
|                                                             |
| <b>Part 2 - Enzyme Activity and Enzyme Release Kinetics</b> |

| Supplier         | Product    | Strength (Lipase) | Batch  | Expiry | Labelled Lipase Activity / Dose Unit | Lipase Assay / Actual Activity per gram | Lipase Assay / Unit Dose | Lipase % of Label Claim |
|------------------|------------|-------------------|--------|--------|--------------------------------------|-----------------------------------------|--------------------------|-------------------------|
| Berlin-Chemie AG | Pangrol    | 40K               | 92019  | Apr-22 | 40000                                | 85626                                   | 42784                    | 107.0                   |
| Cheplapharm      | Cotazym    | 20K               | 507401 | Apr-21 | 20000                                | 69243                                   | 22327                    | 111.6                   |
| Cheplapharm      | Cotazym    | 30K               | 507701 | May-21 | 30000                                | 72283                                   | 33283                    | 110.9                   |
| Cheplapharm      | Cotazym    | 40K               | 659101 | May-21 | 40000                                | 94652                                   | 46081                    | 115.2                   |
| Nordmark         | Pankreatin | 10K               | 012501 | Apr-21 | 10000                                | 60185                                   | 10648                    | 106.5                   |
| Nordmark         | Pankreatin | 20K               | 319301 | May-21 | 20000                                | 60962                                   | 20634                    | 103.2                   |
| Nordmark         | Pankreatin | 40K               | 672401 | Jul-22 | 40000                                | 87876                                   | 41555                    | 103.9                   |
| Nordmark         | Pankreatan | 10K               | 321301 | Apr-22 | 10000                                | 58778                                   | 10516                    | 105.2                   |

## Part 2 - Enzyme Activity and Enzyme Release Kinetics

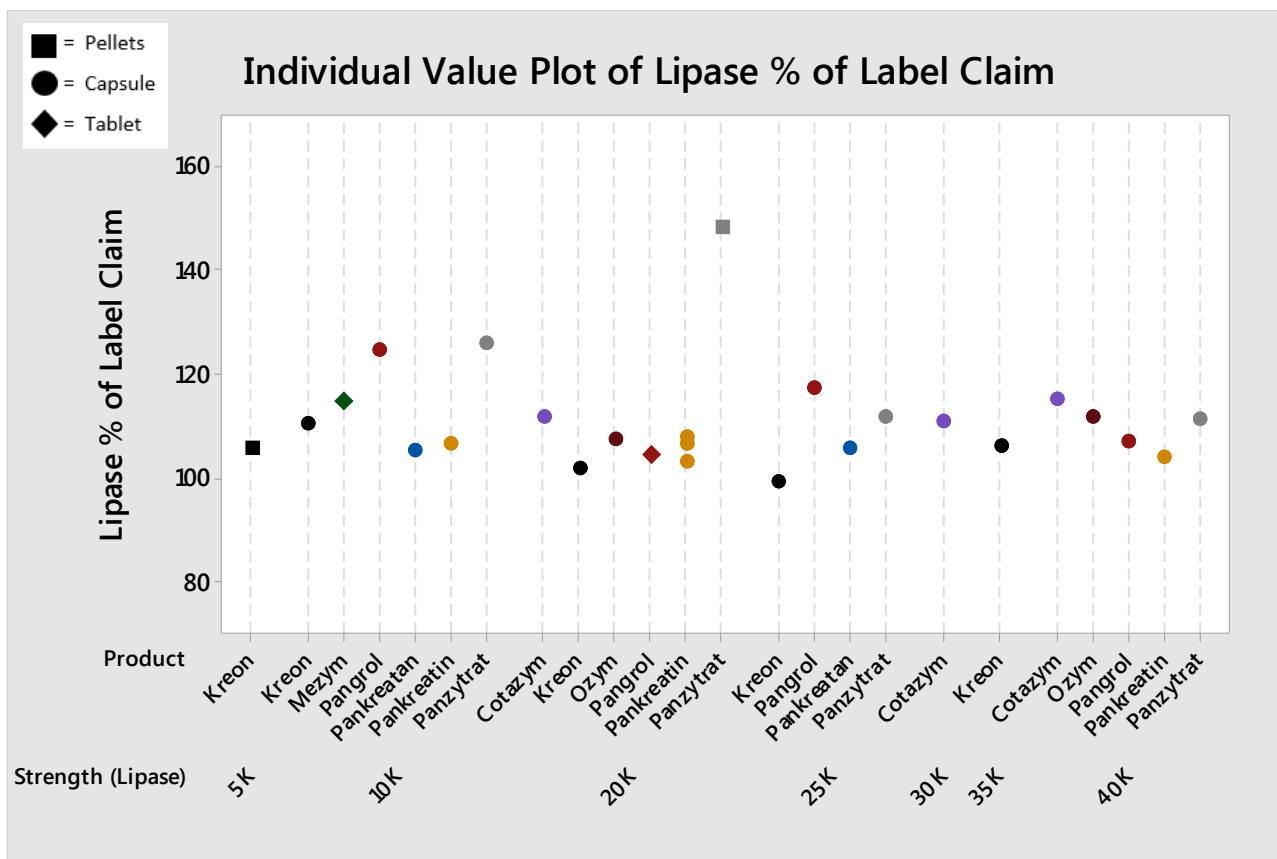

Figure S1: Lipase Activity as % of Label Claim

**Part 2 - Enzyme Activity and Enzyme Release Kinetics**

**Table S8: Amylase Activity Reported Results**

| Supplier | Product   | Strength (Lipase) | Batch  | Expiry | Labelled Amylase Activity / Dose Unit | Amylase Assay / Actual Activity per gram | Amylase Assay / Unit Dose | Amylase % of Label Claim |
|----------|-----------|-------------------|--------|--------|---------------------------------------|------------------------------------------|---------------------------|--------------------------|
| Abbott   | Kreon     | 5K                | 59042  | Nov-22 | 3600                                  | 54847                                    | 5649                      | 156.9                    |
| Abbott   | Kreon     | 10K               | 58519  | Oct-21 | 8000                                  | 48229                                    | 12137                     | 151.7                    |
| Abbott   | Kreon     | 20K               | 58845  | Dec-21 | 16000                                 | 50525                                    | 23967                     | 149.8                    |
| Abbott   | Kreon     | 25K               | 58888  | Jan-22 | 18000                                 | 53376                                    | 25975                     | 144.3                    |
| Abbott   | Kreon     | 35K               | 59016  | Dec-21 | 25200                                 | 51112                                    | 35906                     | 142.5                    |
| Allergan | Panzytrat | 10K               | 337801 | Jan-21 | 9000                                  | 54033                                    | 11016                     | 122.4                    |
| Allergan | Panzytrat | 20K               | 358001 | Oct-22 | 18000                                 | 54797                                    | 21172                     | 117.6                    |

|                                                             |
|-------------------------------------------------------------|
|                                                             |
|                                                             |
| <b>Part 2 - Enzyme Activity and Enzyme Release Kinetics</b> |

| Supplier         | Product   | Strength (Lipase) | Batch  | Expiry | Labelled Amylase Activity / Dose Unit | Amylase Assay / Actual Activity per gram | Amylase Assay / Unit Dose | Amylase % of Label Claim |
|------------------|-----------|-------------------|--------|--------|---------------------------------------|------------------------------------------|---------------------------|--------------------------|
| Allergan         | Panzytrat | 25K               | 413201 | Aug-21 | 15000                                 | 56597                                    | 20922                     | 139.5                    |
| Allergan         | Panzytrat | 40K               | 670501 | May-22 | 25000                                 | 60253                                    | 30131                     | 120.5                    |
| Berlin-Chemie AG | Mezym     | 10K               | 98013  | Mar-22 | 7500                                  | 32051                                    | 9213                      | 122.8                    |
| Berlin-Chemie AG | Pangrol   | 10K               | 94166E | Nov-21 | 9000                                  | 60647                                    | 11728                     | 130.3                    |
| Berlin-Chemie AG | Pangrol   | 20K               | 92027A | May-22 | 12000                                 | 46866                                    | 19244                     | 160.4                    |
| Berlin-Chemie AG | Pangrol   | 25K               | 93255H | Sep-21 | 22500                                 | 63588                                    | 28363                     | 126.1                    |
| Berlin-Chemie AG | Pangrol   | 40K               | 92019  | Apr-22 | 25000                                 | 66277                                    | 33285                     | 133.1                    |
| Cheplapharm      | Cotazym   | 20K               | 507401 | Apr-21 | 14500                                 | 63362                                    | 20292                     | 139.9                    |

|                                                             |
|-------------------------------------------------------------|
|                                                             |
|                                                             |
| <b>Part 2 - Enzyme Activity and Enzyme Release Kinetics</b> |

| Supplier    | Product    | Strength (Lipase) | Batch  | Expiry | Labelled Amylase Activity / Dose Unit | Amylase Assay / Actual Activity per gram | Amylase Assay / Unit Dose | Amylase % of Label Claim |
|-------------|------------|-------------------|--------|--------|---------------------------------------|------------------------------------------|---------------------------|--------------------------|
| Cheplapharm | Cotazym    | 30K               | 507701 | May-21 | 21750                                 | 64716                                    | 30033                     | 138.1                    |
| Cheplapharm | Cotazym    | 40K               | 659101 | May-21 | 25000                                 | 60655                                    | 29655                     | 118.6                    |
| Nordmark    | Pankreatin | 10K               | 012501 | Apr-21 | 7250                                  | 54248                                    | 9665                      | 133.3                    |
| Nordmark    | Pankreatin | 20K               | 319301 | May-21 | 15000                                 | 55647                                    | 19216                     | 128.1                    |
| Nordmark    | Pankreatin | 40K               | 672401 | Jul-22 | 25000                                 | 61360                                    | 28979                     | 115.9                    |
| Nordmark    | Pankreatan | 10K               | 321301 | Apr-22 | 7500                                  | 57182                                    | 10030                     | 133.7                    |
| Nordmark    | Pankreatan | 25K               | 323101 | Jul-22 | 18750                                 | 52208                                    | 22667                     | 120.9                    |
| Ratiopharm  | Pankreatin | 20K               | 321401 | Feb-22 | 15000                                 | 57582                                    | 20545                     | 137.0                    |

|                                                             |
|-------------------------------------------------------------|
|                                                             |
|                                                             |
| <b>Part 2 - Enzyme Activity and Enzyme Release Kinetics</b> |

| Supplier                 | Product    | Strength (Lipase) | Batch | Expiry | Labelled Amylase Activity / Dose Unit | Amylase Assay / Actual Activity per gram | Amylase Assay / Unit Dose | Amylase % of Label Claim |
|--------------------------|------------|-------------------|-------|--------|---------------------------------------|------------------------------------------|---------------------------|--------------------------|
| StadaPharma/Aliud Pharma | Pankreatin | 20K               | 92238 | May-22 | 15000                                 | 51576                                    | 18362                     | 122.4                    |
| Trommsdorff              | Ozym       | 20K               | N001  | Dec-21 | 15000                                 | 56503                                    | 20609                     | 137.4                    |
| Trommsdorff              | Ozym       | 40K               | N002  | Feb-22 | 25000                                 | 64737                                    | 33539                     | 134.2                    |

## Part 2 - Enzyme Activity and Enzyme Release Kinetics

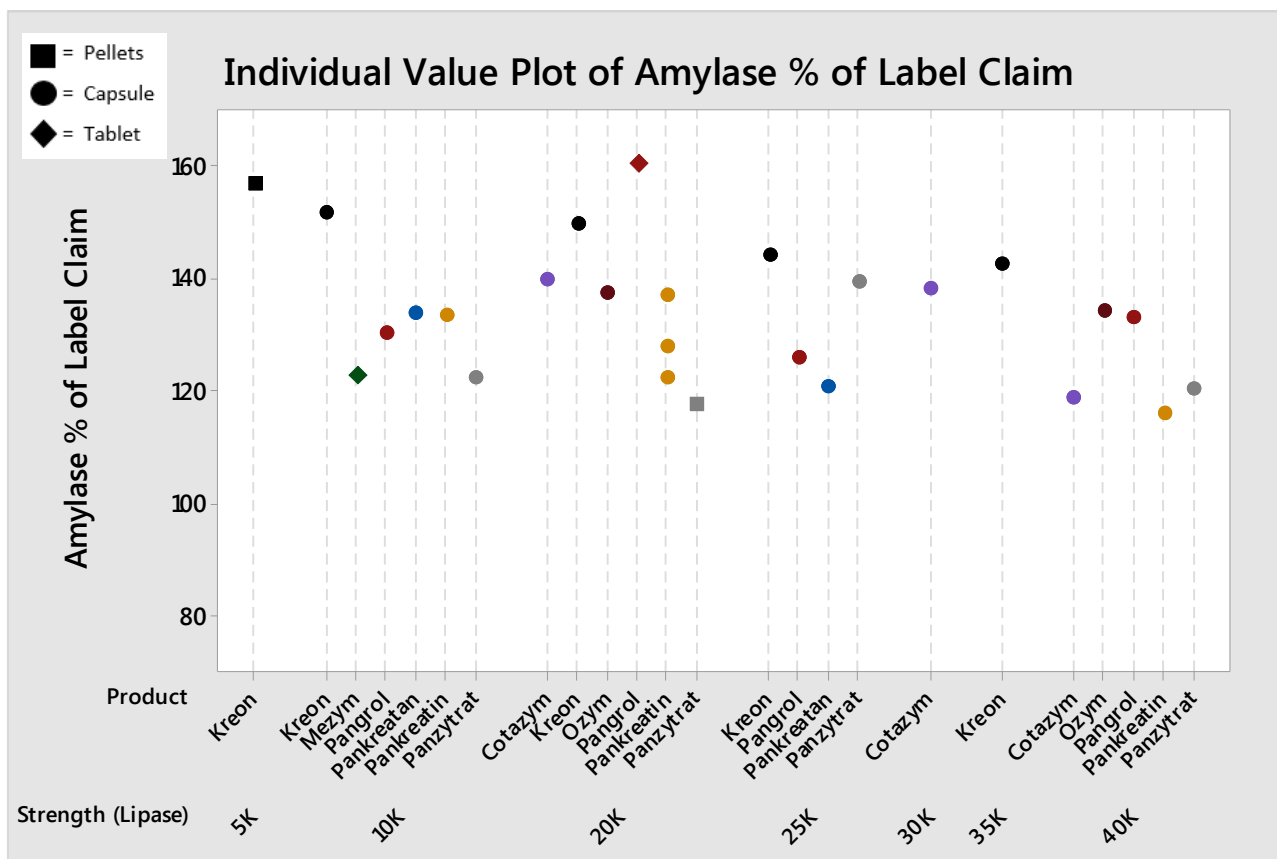

Figure S2: Amylase Activity as % of Label Claim

**Part 2 - Enzyme Activity and Enzyme Release Kinetics**

**Table S9: Total Protease Activity Reported Results**

| Supplier | Product   | Strength (Lipase) | Batch  | Expiry | Labelled Protease Activity / Dose Unit | Protease Assay / Actual Activity per gram | Protease Assay / Unit Dose | Protease % of Label Claim |
|----------|-----------|-------------------|--------|--------|----------------------------------------|-------------------------------------------|----------------------------|---------------------------|
| Abbott   | Kreon     | 5K                | 59042  | Nov-22 | 200                                    | 3269                                      | 330                        | 165.0                     |
| Abbott   | Kreon     | 10K               | 58519  | Oct-21 | 600                                    | 3132                                      | 790                        | 131.7                     |
| Abbott   | Kreon     | 20K               | 58845  | Dec-21 | 1200                                   | 3263                                      | 1556                       | 129.7                     |
| Abbott   | Kreon     | 25K               | 58888  | Jan-22 | 1000                                   | 3024                                      | 1477                       | 147.7                     |
| Abbott   | Kreon     | 35K               | 59016  | Dec-21 | 1400                                   | 2961                                      | 2090                       | 149.2                     |
| Allergan | Panzytrat | 10K               | 337801 | Jan-21 | 500                                    | 2889                                      | 599                        | 119.7                     |
| Allergan | Panzytrat | 20K               | 358001 | Oct-22 | 1000                                   | 2863                                      | 1109                       | 110.9                     |



|                                                             |
|-------------------------------------------------------------|
|                                                             |
|                                                             |
| <b>Part 2 - Enzyme Activity and Enzyme Release Kinetics</b> |

| Supplier         | Product   | Strength (Lipase) | Batch  | Expiry | Labelled Protease Activity / Dose Unit | Protease Assay / Actual Activity per gram | Protease Assay / Unit Dose | Protease % of Label Claim |
|------------------|-----------|-------------------|--------|--------|----------------------------------------|-------------------------------------------|----------------------------|---------------------------|
| Allergan         | Panzytrat | 25K               | 413201 | Aug-21 | 800                                    | 2786                                      | 1012                       | 126.5                     |
| Allergan         | Panzytrat | 40K               | 670501 | May-22 | 1500                                   | 3509                                      | 1761                       | 117.4                     |
| Berlin-Chemie AG | Mezym     | 10K               | 98013  | Mar-22 | 375                                    | 1535                                      | 506                        | 135.0                     |
| Berlin-Chemie AG | Pangrol   | 10K               | 94166E | Nov-21 | 500                                    | 3249                                      | 633                        | 126.6                     |
| Berlin-Chemie AG | Pangrol   | 20K               | 92027A | May-22 | 900                                    | 2714                                      | 1290                       | 143.3                     |
| Berlin-Chemie AG | Pangrol   | 25K               | 93255H | Sep-21 | 1250                                   | 3421                                      | 1529                       | 122.3                     |
| Berlin-Chemie AG | Pangrol   | 40K               | 92019  | Apr-22 | 1500                                   | 3502                                      | 1735                       | 115.7                     |
| Cheplapharm      | Cotazym   | 20K               | 507401 | Apr-21 | 850                                    | 3236                                      | 1041                       | 122.5                     |

|                                                             |
|-------------------------------------------------------------|
|                                                             |
|                                                             |
| <b>Part 2 - Enzyme Activity and Enzyme Release Kinetics</b> |

| Supplier    | Product    | Strength (Lipase) | Batch  | Expiry | Labelled Protease Activity / Dose Unit | Protease Assay / Actual Activity per gram | Protease Assay / Unit Dose | Protease % of Label Claim |
|-------------|------------|-------------------|--------|--------|----------------------------------------|-------------------------------------------|----------------------------|---------------------------|
| Cheplapharm | Cotazym    | 30K               | 507701 | May-21 | 1275                                   | 3704                                      | 1717                       | 134.6                     |
| Cheplapharm | Cotazym    | 40K               | 659101 | May-21 | 1500                                   | 3309                                      | 1601                       | 106.7                     |
| Nordmark    | Pankreatin | 10K               | 012501 | Apr-21 | 425                                    | 3214                                      | 567                        | 133.5                     |
| Nordmark    | Pankreatin | 20K               | 319301 | May-21 | 900                                    | 2874                                      | 987                        | 109.7                     |
| Nordmark    | Pankreatin | 40K               | 672401 | Jul-22 | 1500                                   | 3689                                      | 1742                       | 116.1                     |
| Nordmark    | Pankreatan | 10K               | 321301 | Apr-22 | 450                                    | 2872                                      | 504                        | 112.0                     |
| Nordmark    | Pankreatan | 25K               | 323101 | Jul-22 | 1125                                   | 2773                                      | 1207                       | 107.3                     |
| Ratiopharm  | Pankreatin | 20K               | 321401 | Feb-22 | 900                                    | 2834                                      | 997                        | 110.8                     |

|                                                             |
|-------------------------------------------------------------|
|                                                             |
|                                                             |
| <b>Part 2 - Enzyme Activity and Enzyme Release Kinetics</b> |

| Supplier                 | Product    | Strength (Lipase) | Batch | Expiry | Labelled Protease Activity / Dose Unit | Protease Assay / Actual Activity per gram | Protease Assay / Unit Dose | Protease % of Label Claim |
|--------------------------|------------|-------------------|-------|--------|----------------------------------------|-------------------------------------------|----------------------------|---------------------------|
| StadaPharma/Aliud Pharma | Pankreatin | 20K               | 92238 | May-22 | 900                                    | 2937                                      | 1057                       | 117.5                     |
| Trommsdorff              | Ozym       | 20K               | N001  | Dec-21 | 900                                    | 2942                                      | 1060                       | 117.8                     |
| Trommsdorff              | Ozym       | 40K               | N002  | Feb-22 | 1500                                   | 3283                                      | 1667                       | 111.1                     |

## Part 2 - Enzyme Activity and Enzyme Release Kinetics

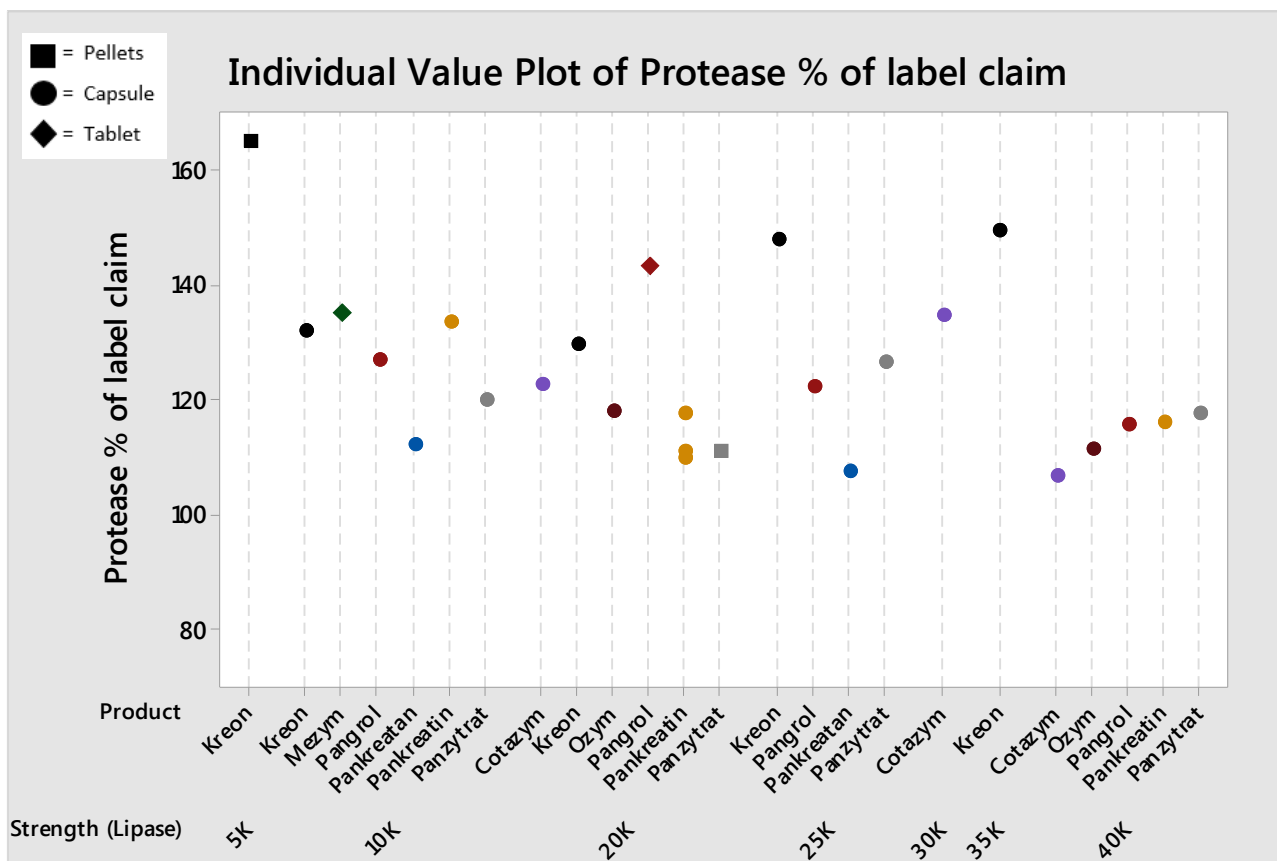

Figure S3: Protease Activity as % Label Claim

**Part 2 - Enzyme Activity and Enzyme Release Kinetics**

**Table S10: Enzyme Release Kinetics Reported Results (Residual Lipase Activity / Ph.Eur.-units)**

| Supplier | Product | Strength<br>(Lipase) | Batch | Expiry | pH<br>Test | Residual Lipase Activity / Ph.Eur.-units |            |            |            |            |            |             |             |
|----------|---------|----------------------|-------|--------|------------|------------------------------------------|------------|------------|------------|------------|------------|-------------|-------------|
|          |         |                      |       |        |            | 15<br>mins                               | 30<br>mins | 45<br>mins | 60<br>mins | 75<br>mins | 90<br>mins | 105<br>mins | 120<br>mins |
| Abbott   | Kreon   | 5K                   | 59042 | Nov-22 | 1 to 6     | 0                                        | 0          | 0          | 0          | 9713       | 47794      | 44672       | 42760       |
| Abbott   | Kreon   | 5K                   | 59042 | Nov-22 | 4 to 6     | 1438                                     | 1508       | 1340       | 470        | 47249      | 43984      | 41989       | 38873       |
| Abbott   | Kreon   | 5K                   | 59042 | Nov-22 | 5 to 6     | 577                                      | 491        | 651        | 646        | 43921      | 47615      | 44749       | 43099       |
| Abbott   | Kreon   | 10K                  | 58519 | Oct-21 | 1 to 6     | 0                                        | 0          | 0          | 0          | 25416      | 37053      | 34684       | 34511       |
| Abbott   | Kreon   | 10K                  | 58519 | Oct-21 | 4 to 6     | 1784                                     | 1835       | 1131       | 1998       | 16605      | 36935      | 34964       | 35879       |
| Abbott   | Kreon   | 10K                  | 58519 | Oct-21 | 5 to 6     | 1978                                     | 2035       | 2509       | 2561       | 32937      | 37434      | 36157       | 34422       |
| Abbott   | Kreon   | 20K                  | 58845 | Dec-21 | 1 to 6     | 0                                        | 0          | 0          | 0          | 6599       | 36467      | 35084       | 34031       |

**Part 2 - Enzyme Activity and Enzyme Release Kinetics**

| Supplier | Product | Strength<br>(Lipase) | Batch | Expiry | pH<br>Test | Residual Lipase Activity / Ph.Eur.-units |            |            |            |            |            |             |             |
|----------|---------|----------------------|-------|--------|------------|------------------------------------------|------------|------------|------------|------------|------------|-------------|-------------|
|          |         |                      |       |        |            | 15<br>mins                               | 30<br>mins | 45<br>mins | 60<br>mins | 75<br>mins | 90<br>mins | 105<br>mins | 120<br>mins |
| Abbott   | Kreon   | 20K                  | 58845 | Dec-21 | 4 to 6     | 773                                      | 1216       | 954        | 1073       | 26917      | 37852      | 36661       | 35298       |
| Abbott   | Kreon   | 20K                  | 58845 | Dec-21 | 5 to 6     | 348                                      | 1266       | 858        | 738        | 12833      | 37450      | 33122       | 31065       |
| Abbott   | Kreon   | 25K                  | 58888 | Jan-22 | 1 to 6     | 0                                        | 0          | 0          | 0          | 13972      | 46111      | 43165       | 41302       |
| Abbott   | Kreon   | 25K                  | 58888 | Jan-22 | 4 to 6     | 379                                      | 1205       | 1047       | 966        | 34856      | 47260      | 44015       | 43565       |
| Abbott   | Kreon   | 25K                  | 58888 | Jan-22 | 5 to 6     | 1078                                     | 1285       | 1348       | 1268       | 13465      | 45969      | 41640       | 41077       |
| Abbott   | Kreon   | 35K                  | 59016 | Dec-21 | 1 to 6     | 0                                        | 0          | 0          | 0          | 10162      | 40699      | 42351       | 41268       |
| Abbott   | Kreon   | 35K                  | 59016 | Dec-21 | 4 to 6     | 1436                                     | 1426       | 596        | 1185       | 28912      | 46002      | 44595       | 43347       |
| Abbott   | Kreon   | 35K                  | 59016 | Dec-21 | 5 to 6     | 1359                                     | 1350       | 1341       | 1776       | 26364      | 48125      | 45615       | 44866       |

**Part 2 - Enzyme Activity and Enzyme Release Kinetics**

| Supplier | Product   | Strength<br>(Lipase) | Batch  | Expiry | pH<br>Test | Residual Lipase Activity / Ph.Eur.-units |            |            |            |            |            |             |             |
|----------|-----------|----------------------|--------|--------|------------|------------------------------------------|------------|------------|------------|------------|------------|-------------|-------------|
|          |           |                      |        |        |            | 15<br>mins                               | 30<br>mins | 45<br>mins | 60<br>mins | 75<br>mins | 90<br>mins | 105<br>mins | 120<br>mins |
| Allergan | Panzytrat | 10K                  | 337801 | Jan-21 | 1 to 6     | 0                                        | 0          | 0          | 0          | 44824      | 46227      | 45916       | 43181       |
| Allergan | Panzytrat | 10K                  | 337801 | Jan-21 | 4 to 6     | 36867                                    | 23680      | 15739      | 11898      | 8911       | 9882       | 8619        | 7881        |
| Allergan | Panzytrat | 10K                  | 337801 | Jan-21 | 5 to 6     | 45055                                    | 37531      | 30453      | 26162      | 22070      | 22865      | 21256       | 21024       |
| Allergan | Panzytrat | 20K                  | 358001 | Oct-22 | 1 to 6     | 0                                        | 0          | 0          | 0          | 50599      | 48573      | 46471       | 41551       |
| Allergan | Panzytrat | 20K                  | 358001 | Oct-22 | 4 to 6     | 0                                        | 1246       | 4510       | 4830       | 48361      | 48205      | 44940       | 43944       |
| Allergan | Panzytrat | 20K                  | 358001 | Oct-22 | 5 to 6     | 29329                                    | 47376      | 40838      | 33399      | 30215      | 27884      | 27252       | 23921       |
| Allergan | Panzytrat | 25K                  | 413201 | Aug-21 | 1 to 6     | 0                                        | 0          | 0          | 0          | 66715      | 62449      | 59895       | 51951       |
| Allergan | Panzytrat | 25K                  | 413201 | Aug-21 | 4 to 6     | 41070                                    | 28083      | 22959      | 17901      | 15776      | 14428      | 13097       | 12228       |

**Part 2 - Enzyme Activity and Enzyme Release Kinetics**

| Supplier         | Product   | Strength<br>(Lipase) | Batch  | Expiry | pH<br>Test | Residual Lipase Activity / Ph.Eur.-units |            |            |            |            |            |             |             |
|------------------|-----------|----------------------|--------|--------|------------|------------------------------------------|------------|------------|------------|------------|------------|-------------|-------------|
|                  |           |                      |        |        |            | 15<br>mins                               | 30<br>mins | 45<br>mins | 60<br>mins | 75<br>mins | 90<br>mins | 105<br>mins | 120<br>mins |
| Allergan         | Panzytrat | 25K                  | 413201 | Aug-21 | 5 to 6     | 59558                                    | 47036      | 40179      | 34752      | 33572      | 26409      | 27442       | 26146       |
| Allergan         | Panzytrat | 40K                  | 670501 | May-22 | 1 to 6     | 0                                        | 0          | 0          | 0          | 6558       | 31138      | 36882       | 44088       |
| Allergan         | Panzytrat | 40K                  | 670501 | May-22 | 4 to 6     | 955                                      | 1541       | 2237       | 2923       | 17349      | 30645      | 38474       | 36952       |
| Allergan         | Panzytrat | 40K                  | 670501 | May-22 | 5 to 6     | 3999                                     | 26397      | 47475      | 45511      | 41520      | 37487      | 32638       | 31302       |
| Berlin-Chemie AG | Mezym     | 10K                  | 98013  | Mar-22 | 1 to 6     | 0                                        | 0          | 0          | 0          | 14638      | 28281      | 27538       | 26529       |
| Berlin-Chemie AG | Mezym     | 10K                  | 98013  | Mar-22 | 4 to 6     | 15069                                    | 17720      | 12062      | 8651       | 7064       | 7016       | 6363        | 6496        |
| Berlin-Chemie AG | Mezym     | 10K                  | 98013  | Mar-22 | 5 to 6     | 29854                                    | 26842      | 25491      | 24456      | 22772      | 21133      | 20362       | 19672       |
| Berlin-Chemie AG | Pangrol   | 10K                  | 94166E | Nov-21 | 1 to 6     | 0                                        | 0          | 0          | 0          | 43120      | 45142      | 46288       | 44897       |



**Part 2 - Enzyme Activity and Enzyme Release Kinetics**

| Supplier         | Product | Strength<br>(Lipase) | Batch  | Expiry | pH<br>Test | Residual Lipase Activity / Ph.Eur.-units |            |            |            |            |            |             |             |
|------------------|---------|----------------------|--------|--------|------------|------------------------------------------|------------|------------|------------|------------|------------|-------------|-------------|
|                  |         |                      |        |        |            | 15<br>mins                               | 30<br>mins | 45<br>mins | 60<br>mins | 75<br>mins | 90<br>mins | 105<br>mins | 120<br>mins |
| Berlin-Chemie AG | Pangrol | 10K                  | 94166E | Nov-21 | 4 to 6     | 4381                                     | 12330      | 13868      | 16100      | 33209      | 34398      | 33868       | 31888       |
| Berlin-Chemie AG | Pangrol | 10K                  | 94166E | Nov-21 | 5 to 6     | 17455                                    | 34803      | 32511      | 37807      | 37153      | 34386      | 34454       | 33973       |
| Berlin-Chemie AG | Pangrol | 20K                  | 92027A | May-22 | 1 to 6     | 0                                        | 0          | 0          | 95         | 10171      | 35361      | 35649       | 32940       |
| Berlin-Chemie AG | Pangrol | 20K                  | 92027A | May-22 | 4 to 6     | 600                                      | 6158       | 11445      | 16561      | 21419      | 19770      | 18864       | 17443       |
| Berlin-Chemie AG | Pangrol | 20K                  | 92027A | May-22 | 5 to 6     | 7185                                     | 19331      | 29687      | 30758      | 24528      | 26777      | 26449       | 24502       |
| Berlin-Chemie AG | Pangrol | 25K                  | 93255H | Sep-21 | 1 to 6     | 0                                        | 0          | 0          | 0          | 52187      | 54949      | 52390       | 49960       |
| Berlin-Chemie AG | Pangrol | 25K                  | 93255H | Sep-21 | 4 to 6     | 31177                                    | 36712      | 29030      | 25495      | 19453      | 18119      | 17596       | 16092       |
| Berlin-Chemie AG | Pangrol | 25K                  | 93255H | Sep-21 | 5 to 6     | 47969                                    | 48494      | 39773      | 37524      | 31869      | 31246      | 30000       | 26742       |

**Part 2 - Enzyme Activity and Enzyme Release Kinetics**

| Supplier         | Product | Strength<br>(Lipase) | Batch  | Expiry | pH<br>Test | Residual Lipase Activity / Ph.Eur.-units |            |            |            |            |            |             |             |
|------------------|---------|----------------------|--------|--------|------------|------------------------------------------|------------|------------|------------|------------|------------|-------------|-------------|
|                  |         |                      |        |        |            | 15<br>mins                               | 30<br>mins | 45<br>mins | 60<br>mins | 75<br>mins | 90<br>mins | 105<br>mins | 120<br>mins |
| Berlin-Chemie AG | Pangrol | 40K                  | 92019  | Apr-22 | 1 to 6     | 0                                        | 0          | 0          | 0          | 8017       | 39820      | 47331       | 51595       |
| Berlin-Chemie AG | Pangrol | 40K                  | 92019  | Apr-22 | 4 to 6     | 0                                        | 0          | 2210       | 1964       | 30034      | 44344      | 48011       | 50609       |
| Berlin-Chemie AG | Pangrol | 40K                  | 92019  | Apr-22 | 5 to 6     | 7814                                     | 28063      | 36059      | 31574      | 39638      | 39134      | 36551       | 33656       |
| Cheplapharm      | Cotazym | 20K                  | 507401 | Apr-21 | 1 to 6     | 0                                        | 0          | 0          | 0          | 6392       | 23524      | 30189       | 42103       |
| Cheplapharm      | Cotazym | 20K                  | 507401 | Apr-21 | 4 to 6     | 836                                      | 1453       | 4845       | 2048       | 18460      | 38896      | 44161       | 41458       |
| Cheplapharm      | Cotazym | 20K                  | 507401 | Apr-21 | 5 to 6     | 6416                                     | 21667      | 31650      | 33217      | 31819      | 30876      | 26856       | 25240       |
| Cheplapharm      | Cotazym | 30K                  | 507701 | May-21 | 1 to 6     | 0                                        | 0          | 0          | 0          | 3487       | 29835      | 43731       | 44317       |
| Cheplapharm      | Cotazym | 30K                  | 507701 | May-21 | 4 to 6     | 0                                        | 0          | 0          | 668        | 19940      | 54021      | 49279       | 43838       |

**Part 2 - Enzyme Activity and Enzyme Release Kinetics**

| Supplier    | Product    | Strength<br>(Lipase) | Batch  | Expiry | pH<br>Test | Residual Lipase Activity / Ph.Eur.-units |            |            |            |            |            |             |             |
|-------------|------------|----------------------|--------|--------|------------|------------------------------------------|------------|------------|------------|------------|------------|-------------|-------------|
|             |            |                      |        |        |            | 15<br>mins                               | 30<br>mins | 45<br>mins | 60<br>mins | 75<br>mins | 90<br>mins | 105<br>mins | 120<br>mins |
| Cheplapharm | Cotazym    | 30K                  | 507701 | May-21 | 5 to 6     | 4585                                     | 26214      | 34203      | 31013      | 30865      | 29571      | 27539       | 25105       |
| Cheplapharm | Cotazym    | 40K                  | 659101 | May-21 | 1 to 6     | 0                                        | 0          | 0          | 0          | 8219       | 35428      | 49237       | 62425       |
| Cheplapharm | Cotazym    | 40K                  | 659101 | May-21 | 4 to 6     | 0                                        | 0          | 1882       | 3307       | 28920      | 55170      | 52390       | 51466       |
| Cheplapharm | Cotazym    | 40K                  | 659101 | May-21 | 5 to 6     | 5565                                     | 39129      | 46235      | 44488      | 37135      | 35746      | 32542       | 30637       |
| Nordmark    | Pankreatin | 10K                  | 012501 | Apr-21 | 1 to 6     | 0                                        | 0          | 0          | 0          | 3060       | 31997      | 44696       | 43144       |
| Nordmark    | Pankreatin | 10K                  | 012501 | Apr-21 | 4 to 6     | 1712                                     | 3873       | 5255       | 7363       | 20432      | 34128      | 41863       | 41300       |
| Nordmark    | Pankreatin | 10K                  | 012501 | Apr-21 | 5 to 6     | 4571                                     | 11497      | 15258      | 19921      | 35787      | 34882      | 31834       | 30869       |
| Nordmark    | Pankreatin | 20K                  | 319301 | May-21 | 1 to 6     | 0                                        | 0          | 0          | 0          | 50658      | 50320      | 48070       | 44810       |

**Part 2 - Enzyme Activity and Enzyme Release Kinetics**

| Supplier | Product    | Strength<br>(Lipase) | Batch  | Expiry | pH<br>Test | Residual Lipase Activity / Ph.Eur.-units |            |            |            |            |            |             |             |
|----------|------------|----------------------|--------|--------|------------|------------------------------------------|------------|------------|------------|------------|------------|-------------|-------------|
|          |            |                      |        |        |            | 15<br>mins                               | 30<br>mins | 45<br>mins | 60<br>mins | 75<br>mins | 90<br>mins | 105<br>mins | 120<br>mins |
| Nordmark | Pankreatin | 20K                  | 319301 | May-21 | 4 to 6     | 29369                                    | 29681      | 23602      | 18354      | 15285      | 14191      | 12946       | 12043       |
| Nordmark | Pankreatin | 20K                  | 319301 | May-21 | 5 to 6     | 43959                                    | 43927      | 36707      | 31815      | 29530      | 28223      | 25749       | 25059       |
| Nordmark | Pankreatin | 40K                  | 672401 | Jul-22 | 1 to 6     | 0                                        | 0          | 0          | 0          | 9055       | 34586      | 47819       | 51495       |
| Nordmark | Pankreatin | 40K                  | 672401 | Jul-22 | 4 to 6     | 0                                        | 0          | 880        | 874        | 22020      | 55108      | 58778       | 59224       |
| Nordmark | Pankreatin | 40K                  | 672401 | Jul-22 | 5 to 6     | 1542                                     | 7656       | 19358      | 28840      | 51008      | 47264      | 42758       | 45274       |
| Nordmark | Pankreatan | 10K                  | 321301 | Apr-22 | 1 to 6     | 0                                        | 0          | 0          | 0          | 34056      | 46841      | 42003       | 40527       |
| Nordmark | Pankreatan | 10K                  | 321301 | Apr-22 | 4 to 6     | 15703                                    | 28445      | 20416      | 16114      | 11812      | 11194      | 10584       | 10246       |
| Nordmark | Pankreatan | 10K                  | 321301 | Apr-22 | 5 to 6     | 19839                                    | 27386      | 35013      | 27840      | 27076      | 24274      | 22583       | 21448       |

**Part 2 - Enzyme Activity and Enzyme Release Kinetics**

| Supplier                    | Product    | Strength<br>(Lipase) | Batch  | Expiry | pH<br>Test | Residual Lipase Activity / Ph.Eur.-units |            |            |            |            |            |             |             |
|-----------------------------|------------|----------------------|--------|--------|------------|------------------------------------------|------------|------------|------------|------------|------------|-------------|-------------|
|                             |            |                      |        |        |            | 15<br>mins                               | 30<br>mins | 45<br>mins | 60<br>mins | 75<br>mins | 90<br>mins | 105<br>mins | 120<br>mins |
| Nordmark                    | Pankreatan | 25K                  | 323101 | Jul-22 | 1 to 6     | 0                                        | 0          | 0          | 0          | 53115      | 47556      | 43672       | 41695       |
| Nordmark                    | Pankreatan | 25K                  | 323101 | Jul-22 | 4 to 6     | 23975                                    | 29243      | 23046      | 18571      | 15829      | 14525      | 13576       | 12218       |
| Nordmark                    | Pankreatan | 25K                  | 323101 | Jul-22 | 5 to 6     | 45778                                    | 38633      | 32774      | 27355      | 26594      | 23798      | 23634       | 21959       |
| Ratiopharm                  | Pankreatin | 20K                  | 321401 | Feb-22 | 1 to 6     | 0                                        | 0          | 0          | 0          | 31249      | 47089      | 44864       | 41716       |
| Ratiopharm                  | Pankreatin | 20K                  | 321401 | Feb-22 | 4 to 6     | 38218                                    | 23860      | 19286      | 15439      | 11678      | 10279      | 10208       | 9393        |
| Ratiopharm                  | Pankreatin | 20K                  | 321401 | Feb-22 | 5 to 6     | 32773                                    | 37487      | 31748      | 26960      | 23841      | 20886      | 20360       | 18890       |
| StadaPharma/Aliud<br>Pharma | Pankreatin | 20K                  | 92238  | May-22 | 1 to 6     | 0                                        | 0          | 0          | 0          | 49869      | 45197      | 43019       | 39749       |
| StadaPharma/Aliud<br>Pharma | Pankreatin | 20K                  | 92238  | May-22 | 4 to 6     | 31064                                    | 24806      | 18458      | 12365      | 12486      | 11388      | 10389       | 10566       |

**Part 2 - Enzyme Activity and Enzyme Release Kinetics**

| Supplier                    | Product    | Strength<br>(Lipase) | Batch | Expiry | pH<br>Test | Residual Lipase Activity / Ph.Eur.-units |            |            |            |            |            |             |             |
|-----------------------------|------------|----------------------|-------|--------|------------|------------------------------------------|------------|------------|------------|------------|------------|-------------|-------------|
|                             |            |                      |       |        |            | 15<br>mins                               | 30<br>mins | 45<br>mins | 60<br>mins | 75<br>mins | 90<br>mins | 105<br>mins | 120<br>mins |
| StadaPharma/Aliud<br>Pharma | Pankreatin | 20K                  | 92238 | May-22 | 5 to 6     | 40165                                    | 34969      | 33229      | 27675      | 25966      | 24494      | 23775       | 20602       |
| Trommsdorff                 | Ozym       | 20K                  | N001  | Dec-21 | 1 to 6     | 0                                        | 0          | 0          | 0          | 47700      | 45553      | 41202       | 39037       |
| Trommsdorff                 | Ozym       | 20K                  | N001  | Dec-21 | 4 to 6     | 32475                                    | 25370      | 19108      | 14504      | 14610      | 13444      | 13189       | 11804       |
| Trommsdorff                 | Ozym       | 20K                  | N001  | Dec-21 | 5 to 6     | 43476                                    | 34295      | 29739      | 25779      | 24506      | 22569      | 20744       | 20687       |
| Trommsdorff                 | Ozym       | 40K                  | N002  | Feb-22 | 1 to 6     | 0                                        | 0          | 0          | 0          | 10665      | 44893      | 49327       | 55265       |
| Trommsdorff                 | Ozym       | 40K                  | N002  | Feb-22 | 4 to 6     | 2271                                     | 1858       | 4217       | 4843       | 28155      | 49064      | 51170       | 44304       |
| Trommsdorff                 | Ozym       | 40K                  | N002  | Feb-22 | 5 to 6     | 6024                                     | 22471      | 36848      | 36861      | 36425      | 31897      | 32192       | 28389       |

**Part 2 - Enzyme Activity and Enzyme Release Kinetics**

**Table S11: Enzyme Release Kinetics Reported Results (Residual Lipase Activity as % of Lipase Activity)**

| Supplier | Product | Strength<br>(Lipase) | Batch | Expiry | pH<br>Test | Residual Lipase Activity as % of Lipase Activity |            |            |            |            |            |             |             |
|----------|---------|----------------------|-------|--------|------------|--------------------------------------------------|------------|------------|------------|------------|------------|-------------|-------------|
|          |         |                      |       |        |            | 15<br>mins                                       | 30<br>mins | 45<br>mins | 60<br>mins | 75<br>mins | 90<br>mins | 105<br>mins | 120<br>mins |
| Abbott   | Kreon   | 5K                   | 59042 | Nov-22 | 1 to 6     | 0                                                | 0          | 0          | 0          | 18         | 90         | 84          | 81          |
| Abbott   | Kreon   | 5K                   | 59042 | Nov-22 | 4 to 6     | 3                                                | 3          | 3          | 1          | 89         | 83         | 79          | 74          |
| Abbott   | Kreon   | 5K                   | 59042 | Nov-22 | 5 to 6     | 1                                                | 1          | 1          | 1          | 83         | 90         | 85          | 82          |
| Abbott   | Kreon   | 10K                  | 58519 | Oct-21 | 1 to 6     | 0                                                | 0          | 0          | 0          | 58         | 84         | 79          | 79          |
| Abbott   | Kreon   | 10K                  | 58519 | Oct-21 | 4 to 6     | 4                                                | 4          | 3          | 5          | 38         | 84         | 80          | 82          |
| Abbott   | Kreon   | 10K                  | 58519 | Oct-21 | 5 to 6     | 5                                                | 5          | 6          | 6          | 75         | 85         | 82          | 78          |
| Abbott   | Kreon   | 20K                  | 58845 | Dec-21 | 1 to 6     | 0                                                | 0          | 0          | 0          | 15         | 85         | 82          | 80          |

**Part 2 - Enzyme Activity and Enzyme Release Kinetics**

| Supplier | Product | Strength<br>(Lipase) | Batch | Expiry | pH<br>Test | Residual Lipase Activity as % of Lipase Activity |            |            |            |            |            |             |             |
|----------|---------|----------------------|-------|--------|------------|--------------------------------------------------|------------|------------|------------|------------|------------|-------------|-------------|
|          |         |                      |       |        |            | 15<br>mins                                       | 30<br>mins | 45<br>mins | 60<br>mins | 75<br>mins | 90<br>mins | 105<br>mins | 120<br>mins |
| Abbott   | Kreon   | 20K                  | 58845 | Dec-21 | 4 to 6     | 2                                                | 3          | 2          | 3          | 63         | 88         | 86          | 82          |
| Abbott   | Kreon   | 20K                  | 58845 | Dec-21 | 5 to 6     | 1                                                | 3          | 2          | 2          | 30         | 88         | 77          | 73          |
| Abbott   | Kreon   | 25K                  | 58888 | Jan-22 | 1 to 6     | 0                                                | 0          | 0          | 0          | 28         | 91         | 85          | 81          |
| Abbott   | Kreon   | 25K                  | 58888 | Jan-22 | 4 to 6     | 1                                                | 2          | 2          | 2          | 69         | 93         | 87          | 86          |
| Abbott   | Kreon   | 25K                  | 58888 | Jan-22 | 5 to 6     | 2                                                | 3          | 3          | 2          | 27         | 90         | 82          | 81          |
| Abbott   | Kreon   | 35K                  | 59016 | Dec-21 | 1 to 6     | 0                                                | 0          | 0          | 0          | 19         | 77         | 80          | 78          |
| Abbott   | Kreon   | 35K                  | 59016 | Dec-21 | 4 to 6     | 3                                                | 3          | 1          | 2          | 55         | 87         | 85          | 82          |
| Abbott   | Kreon   | 35K                  | 59016 | Dec-21 | 5 to 6     | 3                                                | 3          | 3          | 3          | 50         | 91         | 87          | 85          |



**Part 2 - Enzyme Activity and Enzyme Release Kinetics**

| Supplier | Product   | Strength<br>(Lipase) | Batch  | Expiry | pH<br>Test | Residual Lipase Activity as % of Lipase Activity |            |            |            |            |            |             |             |
|----------|-----------|----------------------|--------|--------|------------|--------------------------------------------------|------------|------------|------------|------------|------------|-------------|-------------|
|          |           |                      |        |        |            | 15<br>mins                                       | 30<br>mins | 45<br>mins | 60<br>mins | 75<br>mins | 90<br>mins | 105<br>mins | 120<br>mins |
| Allergan | Panzytrat | 10K                  | 337801 | Jan-21 | 1 to 6     | 0                                                | 0          | 0          | 0          | 72         | 75         | 74          | 70          |
| Allergan | Panzytrat | 10K                  | 337801 | Jan-21 | 4 to 6     | 60                                               | 38         | 25         | 19         | 14         | 16         | 14          | 13          |
| Allergan | Panzytrat | 10K                  | 337801 | Jan-21 | 5 to 6     | 73                                               | 61         | 49         | 42         | 36         | 37         | 34          | 34          |
| Allergan | Panzytrat | 20K                  | 358001 | Oct-22 | 1 to 6     | 0                                                | 0          | 0          | 0          | 76         | 73         | 70          | 62          |
| Allergan | Panzytrat | 20K                  | 358001 | Oct-22 | 4 to 6     | 0                                                | 2          | 7          | 7          | 72         | 72         | 67          | 66          |
| Allergan | Panzytrat | 20K                  | 358001 | Oct-22 | 5 to 6     | 44                                               | 71         | 61         | 50         | 45         | 42         | 41          | 36          |
| Allergan | Panzytrat | 25K                  | 413201 | Aug-21 | 1 to 6     | 0                                                | 0          | 0          | 0          | 88         | 82         | 79          | 68          |
| Allergan | Panzytrat | 25K                  | 413201 | Aug-21 | 4 to 6     | 54                                               | 37         | 30         | 24         | 21         | 19         | 17          | 16          |

**Part 2 - Enzyme Activity and Enzyme Release Kinetics**

| Supplier         | Product   | Strength<br>(Lipase) | Batch  | Expiry | pH<br>Test | Residual Lipase Activity as % of Lipase Activity |            |            |            |            |            |             |             |
|------------------|-----------|----------------------|--------|--------|------------|--------------------------------------------------|------------|------------|------------|------------|------------|-------------|-------------|
|                  |           |                      |        |        |            | 15<br>mins                                       | 30<br>mins | 45<br>mins | 60<br>mins | 75<br>mins | 90<br>mins | 105<br>mins | 120<br>mins |
| Allergan         | Panzytrat | 25K                  | 413201 | Aug-21 | 5 to 6     | 78                                               | 62         | 53         | 46         | 44         | 35         | 36          | 34          |
| Allergan         | Panzytrat | 40K                  | 670501 | May-22 | 1 to 6     | 0                                                | 0          | 0          | 0          | 7          | 35         | 42          | 50          |
| Allergan         | Panzytrat | 40K                  | 670501 | May-22 | 4 to 6     | 1                                                | 2          | 3          | 3          | 20         | 35         | 44          | 42          |
| Allergan         | Panzytrat | 40K                  | 670501 | May-22 | 5 to 6     | 5                                                | 30         | 54         | 52         | 47         | 43         | 37          | 36          |
| Berlin-Chemie AG | Mezym     | 10K                  | 98013  | Mar-22 | 1 to 6     | 0                                                | 0          | 0          | 0          | 42         | 82         | 79          | 77          |
| Berlin-Chemie AG | Mezym     | 10K                  | 98013  | Mar-22 | 4 to 6     | 44                                               | 51         | 35         | 25         | 20         | 20         | 18          | 19          |
| Berlin-Chemie AG | Mezym     | 10K                  | 98013  | Mar-22 | 5 to 6     | 86                                               | 77         | 74         | 71         | 66         | 61         | 59          | 57          |
| Berlin-Chemie AG | Pangrol   | 10K                  | 94166E | Nov-21 | 1 to 6     | 0                                                | 0          | 0          | 0          | 69         | 72         | 74          | 72          |

**Part 2 - Enzyme Activity and Enzyme Release Kinetics**

| Supplier         | Product | Strength<br>(Lipase) | Batch  | Expiry | pH<br>Test | Residual Lipase Activity as % of Lipase Activity |            |            |            |            |            |             |             |
|------------------|---------|----------------------|--------|--------|------------|--------------------------------------------------|------------|------------|------------|------------|------------|-------------|-------------|
|                  |         |                      |        |        |            | 15<br>mins                                       | 30<br>mins | 45<br>mins | 60<br>mins | 75<br>mins | 90<br>mins | 105<br>mins | 120<br>mins |
| Berlin-Chemie AG | Pangrol | 10K                  | 94166E | Nov-21 | 4 to 6     | 7                                                | 20         | 22         | 26         | 53         | 55         | 54          | 51          |
| Berlin-Chemie AG | Pangrol | 10K                  | 94166E | Nov-21 | 5 to 6     | 28                                               | 55         | 52         | 60         | 59         | 55         | 55          | 54          |
| Berlin-Chemie AG | Pangrol | 20K                  | 92027A | May-22 | 1 to 6     | 0                                                | 0          | 0          | 0          | 23         | 80         | 81          | 75          |
| Berlin-Chemie AG | Pangrol | 20K                  | 92027A | May-22 | 4 to 6     | 1                                                | 14         | 26         | 38         | 49         | 45         | 43          | 40          |
| Berlin-Chemie AG | Pangrol | 20K                  | 92027A | May-22 | 5 to 6     | 16                                               | 44         | 67         | 70         | 56         | 61         | 60          | 56          |
| Berlin-Chemie AG | Pangrol | 25K                  | 93255H | Sep-21 | 1 to 6     | 0                                                | 0          | 0          | 0          | 79         | 83         | 79          | 76          |
| Berlin-Chemie AG | Pangrol | 25K                  | 93255H | Sep-21 | 4 to 6     | 47                                               | 56         | 44         | 39         | 29         | 27         | 27          | 24          |
| Berlin-Chemie AG | Pangrol | 25K                  | 93255H | Sep-21 | 5 to 6     | 73                                               | 73         | 60         | 57         | 48         | 47         | 45          | 40          |

**Part 2 - Enzyme Activity and Enzyme Release Kinetics**

| Supplier         | Product | Strength<br>(Lipase) | Batch  | Expiry | pH<br>Test | Residual Lipase Activity as % of Lipase Activity |            |            |            |            |            |             |             |
|------------------|---------|----------------------|--------|--------|------------|--------------------------------------------------|------------|------------|------------|------------|------------|-------------|-------------|
|                  |         |                      |        |        |            | 15<br>mins                                       | 30<br>mins | 45<br>mins | 60<br>mins | 75<br>mins | 90<br>mins | 105<br>mins | 120<br>mins |
| Berlin-Chemie AG | Pangrol | 40K                  | 92019  | Apr-22 | 1 to 6     | 0                                                | 0          | 0          | 0          | 9          | 47         | 55          | 60          |
| Berlin-Chemie AG | Pangrol | 40K                  | 92019  | Apr-22 | 4 to 6     | 0                                                | 0          | 3          | 2          | 35         | 52         | 56          | 59          |
| Berlin-Chemie AG | Pangrol | 40K                  | 92019  | Apr-22 | 5 to 6     | 9                                                | 33         | 42         | 37         | 46         | 46         | 43          | 39          |
| Cheplapharm      | Cotazym | 20K                  | 507401 | Apr-21 | 1 to 6     | 0                                                | 0          | 0          | 0          | 9          | 34         | 44          | 61          |
| Cheplapharm      | Cotazym | 20K                  | 507401 | Apr-21 | 4 to 6     | 1                                                | 2          | 7          | 3          | 27         | 56         | 64          | 60          |
| Cheplapharm      | Cotazym | 20K                  | 507401 | Apr-21 | 5 to 6     | 9                                                | 31         | 46         | 48         | 46         | 45         | 39          | 36          |
| Cheplapharm      | Cotazym | 30K                  | 507701 | May-21 | 1 to 6     | 0                                                | 0          | 0          | 0          | 5          | 41         | 60          | 61          |
| Cheplapharm      | Cotazym | 30K                  | 507701 | May-21 | 4 to 6     | 0                                                | 0          | 0          | 1          | 28         | 75         | 68          | 61          |

**Part 2 - Enzyme Activity and Enzyme Release Kinetics**

| Supplier    | Product    | Strength<br>(Lipase) | Batch  | Expiry | pH<br>Test | Residual Lipase Activity as % of Lipase Activity |            |            |            |            |            |             |             |
|-------------|------------|----------------------|--------|--------|------------|--------------------------------------------------|------------|------------|------------|------------|------------|-------------|-------------|
|             |            |                      |        |        |            | 15<br>mins                                       | 30<br>mins | 45<br>mins | 60<br>mins | 75<br>mins | 90<br>mins | 105<br>mins | 120<br>mins |
| Cheplapharm | Cotazym    | 30K                  | 507701 | May-21 | 5 to 6     | 6                                                | 36         | 47         | 43         | 43         | 41         | 38          | 35          |
| Cheplapharm | Cotazym    | 40K                  | 659101 | May-21 | 1 to 6     | 0                                                | 0          | 0          | 0          | 9          | 37         | 52          | 66          |
| Cheplapharm | Cotazym    | 40K                  | 659101 | May-21 | 4 to 6     | 0                                                | 0          | 2          | 3          | 31         | 58         | 55          | 54          |
| Cheplapharm | Cotazym    | 40K                  | 659101 | May-21 | 5 to 6     | 6                                                | 41         | 49         | 47         | 39         | 38         | 34          | 32          |
| Nordmark    | Pankreatin | 10K                  | 012501 | Apr-21 | 1 to 6     | 0                                                | 0          | 0          | 0          | 5          | 53         | 74          | 72          |
| Nordmark    | Pankreatin | 10K                  | 012501 | Apr-21 | 4 to 6     | 3                                                | 6          | 9          | 12         | 34         | 57         | 70          | 69          |
| Nordmark    | Pankreatin | 10K                  | 012501 | Apr-21 | 5 to 6     | 8                                                | 19         | 25         | 33         | 59         | 58         | 53          | 51          |
| Nordmark    | Pankreatin | 20K                  | 319301 | May-21 | 1 to 6     | 0                                                | 0          | 0          | 0          | 83         | 83         | 79          | 74          |

**Part 2 - Enzyme Activity and Enzyme Release Kinetics**

| Supplier | Product    | Strength<br>(Lipase) | Batch  | Expiry | pH<br>Test | Residual Lipase Activity as % of Lipase Activity |            |            |            |            |            |             |             |
|----------|------------|----------------------|--------|--------|------------|--------------------------------------------------|------------|------------|------------|------------|------------|-------------|-------------|
|          |            |                      |        |        |            | 15<br>mins                                       | 30<br>mins | 45<br>mins | 60<br>mins | 75<br>mins | 90<br>mins | 105<br>mins | 120<br>mins |
| Nordmark | Pankreatin | 20K                  | 319301 | May-21 | 4 to 6     | 48                                               | 49         | 39         | 30         | 25         | 23         | 21          | 20          |
| Nordmark | Pankreatin | 20K                  | 319301 | May-21 | 5 to 6     | 72                                               | 72         | 60         | 52         | 48         | 46         | 42          | 41          |
| Nordmark | Pankreatin | 40K                  | 672401 | Jul-22 | 1 to 6     | 0                                                | 0          | 0          | 0          | 10         | 39         | 54          | 59          |
| Nordmark | Pankreatin | 40K                  | 672401 | Jul-22 | 4 to 6     | 0                                                | 0          | 1          | 1          | 25         | 63         | 67          | 67          |
| Nordmark | Pankreatin | 40K                  | 672401 | Jul-22 | 5 to 6     | 2                                                | 9          | 22         | 33         | 58         | 54         | 49          | 52          |
| Nordmark | Pankreatan | 10K                  | 321301 | Apr-22 | 1 to 6     | 0                                                | 0          | 0          | 0          | 58         | 80         | 71          | 69          |
| Nordmark | Pankreatan | 10K                  | 321301 | Apr-22 | 4 to 6     | 27                                               | 48         | 35         | 27         | 20         | 19         | 18          | 17          |
| Nordmark | Pankreatan | 10K                  | 321301 | Apr-22 | 5 to 6     | 34                                               | 47         | 60         | 47         | 46         | 41         | 38          | 36          |

**Part 2 - Enzyme Activity and Enzyme Release Kinetics**

| Supplier                    | Product    | Strength<br>(Lipase) | Batch  | Expiry | pH<br>Test | Residual Lipase Activity as % of Lipase Activity |            |            |            |            |            |             |             |
|-----------------------------|------------|----------------------|--------|--------|------------|--------------------------------------------------|------------|------------|------------|------------|------------|-------------|-------------|
|                             |            |                      |        |        |            | 15<br>mins                                       | 30<br>mins | 45<br>mins | 60<br>mins | 75<br>mins | 90<br>mins | 105<br>mins | 120<br>mins |
| Nordmark                    | Pankreatan | 25K                  | 323101 | Jul-22 | 1 to 6     | 0                                                | 0          | 0          | 0          | 86         | 77         | 71          | 68          |
| Nordmark                    | Pankreatan | 25K                  | 323101 | Jul-22 | 4 to 6     | 39                                               | 48         | 37         | 30         | 26         | 24         | 22          | 20          |
| Nordmark                    | Pankreatan | 25K                  | 323101 | Jul-22 | 5 to 6     | 74                                               | 63         | 53         | 45         | 43         | 39         | 38          | 36          |
| Ratiopharm                  | Pankreatin | 20K                  | 321401 | Feb-22 | 1 to 6     | 0                                                | 0          | 0          | 0          | 50         | 76         | 72          | 67          |
| Ratiopharm                  | Pankreatin | 20K                  | 321401 | Feb-22 | 4 to 6     | 61                                               | 38         | 31         | 25         | 19         | 16         | 16          | 15          |
| Ratiopharm                  | Pankreatin | 20K                  | 321401 | Feb-22 | 5 to 6     | 53                                               | 60         | 51         | 43         | 38         | 34         | 33          | 30          |
| StadaPharma/Aliud<br>Pharma | Pankreatin | 20K                  | 92238  | May-22 | 1 to 6     | 0                                                | 0          | 0          | 0          | 83         | 75         | 72          | 66          |
| StadaPharma/Aliud<br>Pharma | Pankreatin | 20K                  | 92238  | May-22 | 4 to 6     | 52                                               | 41         | 31         | 21         | 21         | 19         | 17          | 18          |

**Part 2 - Enzyme Activity and Enzyme Release Kinetics**

| Supplier                    | Product    | Strength<br>(Lipase) | Batch | Expiry | pH<br>Test | Residual Lipase Activity as % of Lipase Activity |            |            |            |            |            |             |             |
|-----------------------------|------------|----------------------|-------|--------|------------|--------------------------------------------------|------------|------------|------------|------------|------------|-------------|-------------|
|                             |            |                      |       |        |            | 15<br>mins                                       | 30<br>mins | 45<br>mins | 60<br>mins | 75<br>mins | 90<br>mins | 105<br>mins | 120<br>mins |
| StadaPharma/Aliud<br>Pharma | Pankreatin | 20K                  | 92238 | May-22 | 5 to 6     | 67                                               | 58         | 55         | 46         | 43         | 41         | 40          | 34          |
| Trommsdorff                 | Ozym       | 20K                  | N001  | Dec-21 | 1 to 6     | 0                                                | 0          | 0          | 0          | 81         | 77         | 70          | 66          |
| Trommsdorff                 | Ozym       | 20K                  | N001  | Dec-21 | 4 to 6     | 55                                               | 43         | 32         | 25         | 25         | 23         | 22          | 20          |
| Trommsdorff                 | Ozym       | 20K                  | N001  | Dec-21 | 5 to 6     | 74                                               | 58         | 50         | 44         | 41         | 38         | 35          | 35          |
| Trommsdorff                 | Ozym       | 40K                  | N002  | Feb-22 | 1 to 6     | 0                                                | 0          | 0          | 0          | 12         | 51         | 56          | 63          |
| Trommsdorff                 | Ozym       | 40K                  | N002  | Feb-22 | 4 to 6     | 3                                                | 2          | 5          | 6          | 32         | 56         | 58          | 51          |
| Trommsdorff                 | Ozym       | 40K                  | N002  | Feb-22 | 5 to 6     | 7                                                | 26         | 42         | 42         | 42         | 36         | 37          | 32          |



## Part 2 - Enzyme Activity and Enzyme Release Kinetics

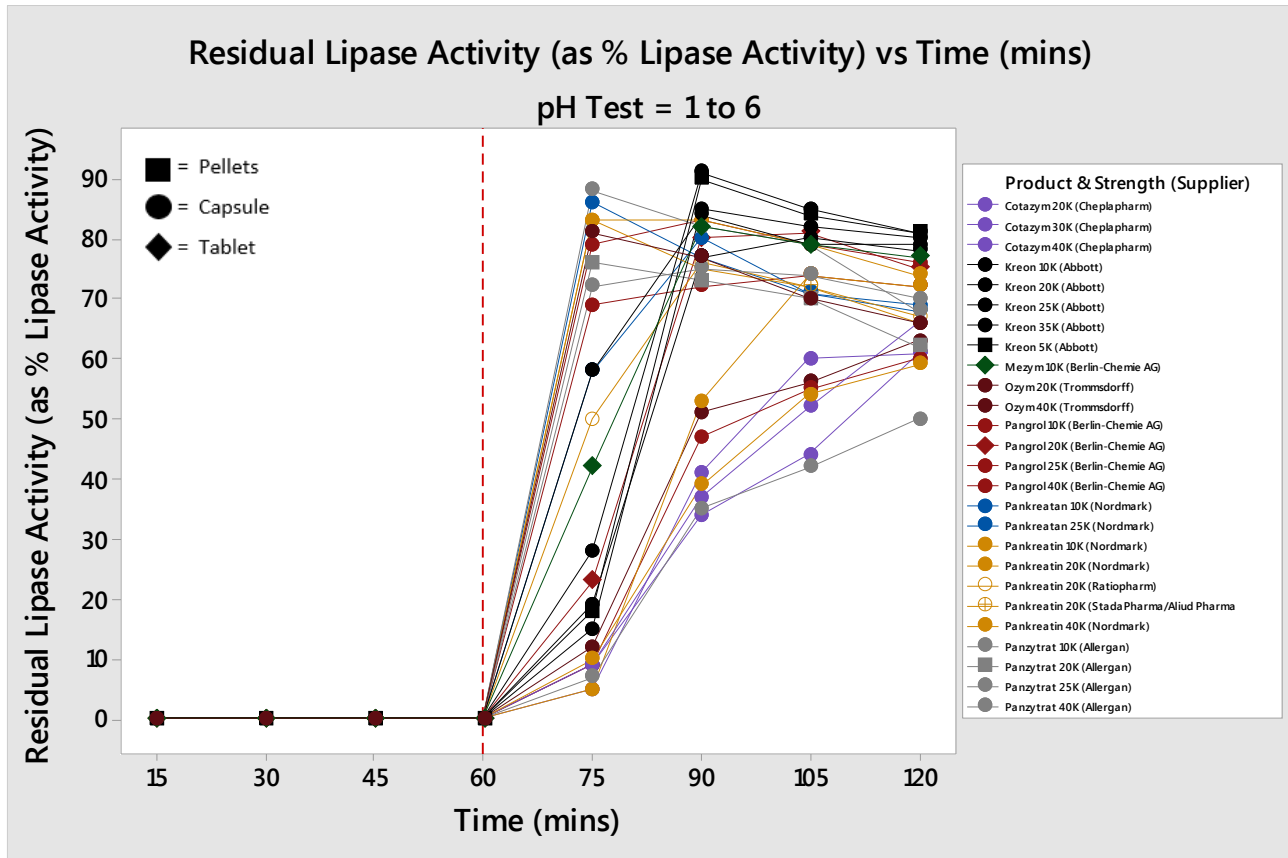

Figure S4: Residual Lipase Activity (as % Lipase Activity) vs Time-Point - pH Test = 1 to 6

## Part 2 - Enzyme Activity and Enzyme Release Kinetics

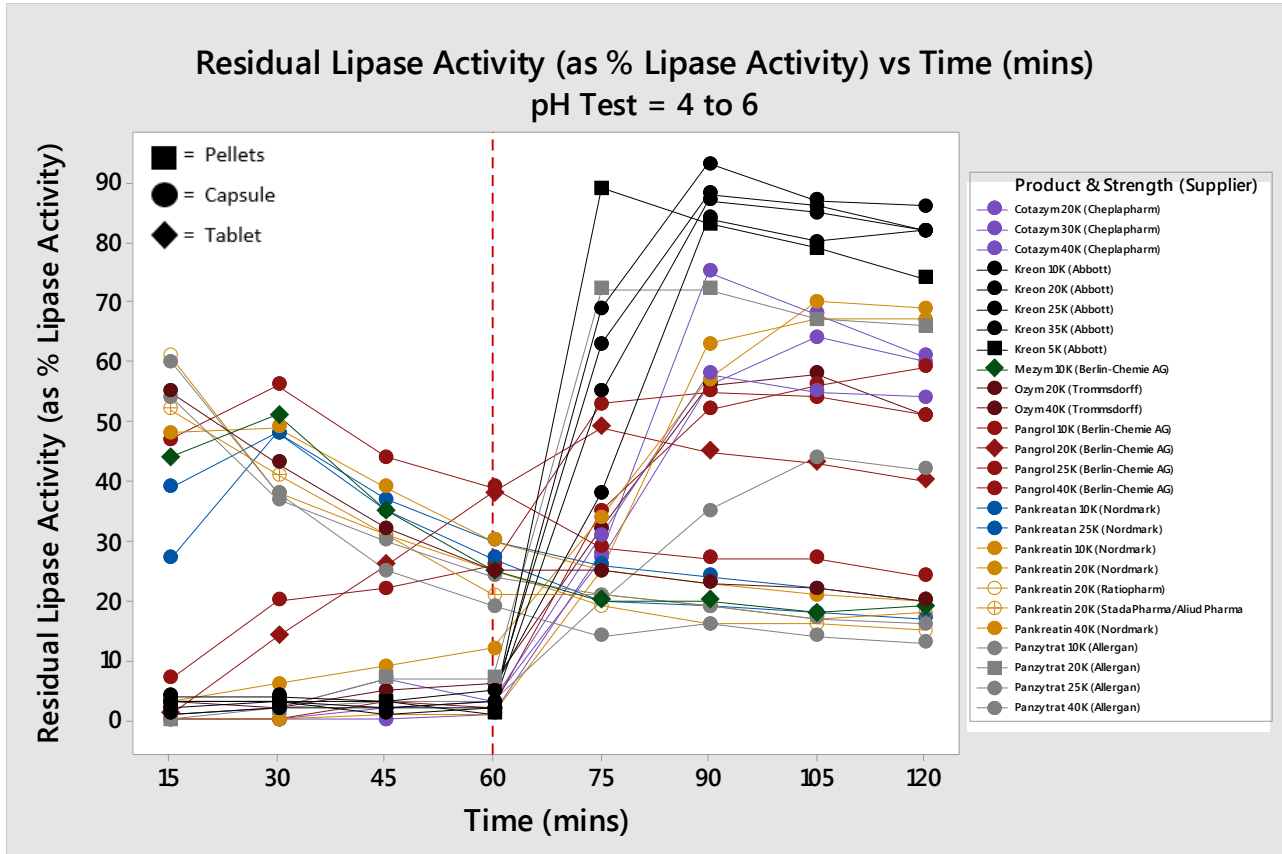

Figure S5: Residual Lipase Activity (as % Lipase Activity) vs Time-Point - pH Test = 4 to 6

## Part 2 - Enzyme Activity and Enzyme Release Kinetics

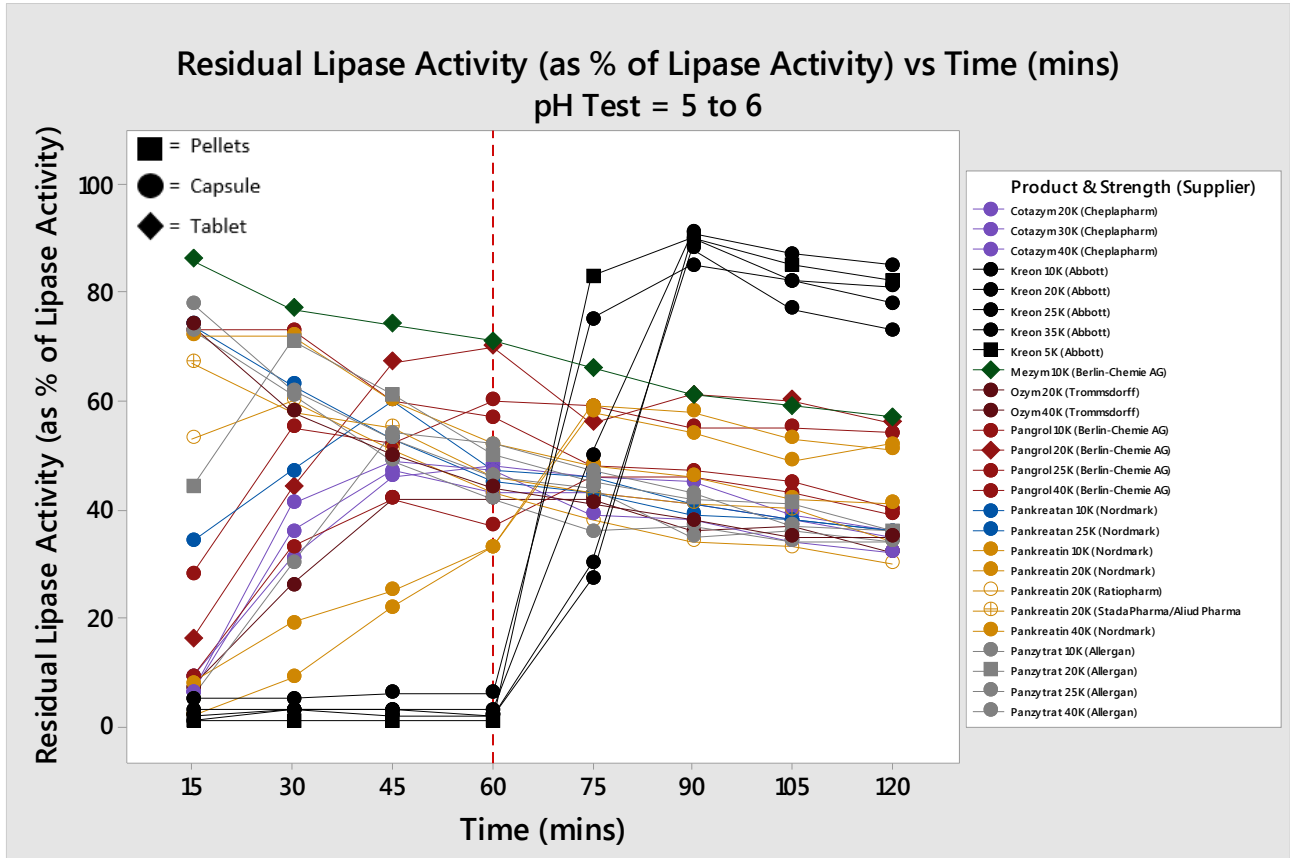

Figure S6: Residual Lipase Activity (as % Lipase Activity) vs Time-Point - pH Test = 5 to 6

## Part 2 - Enzyme Activity and Enzyme Release Kinetics

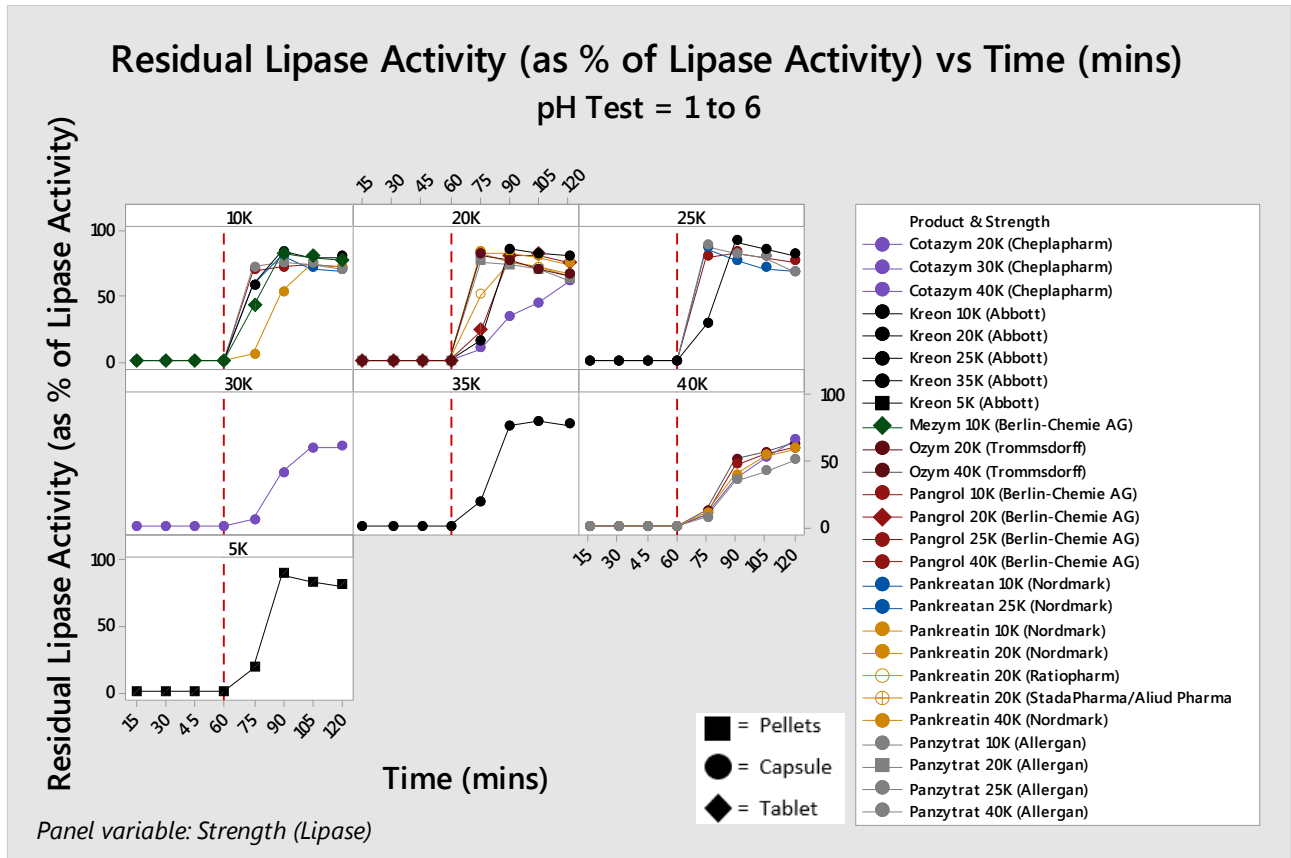

**Figure S7: Residual Lipase Activity (as % of Lipase Activity) vs Time (mins) - pH Test = 1 to 6 Grouped by Individual Strength**

## Part 2 - Enzyme Activity and Enzyme Release Kinetics

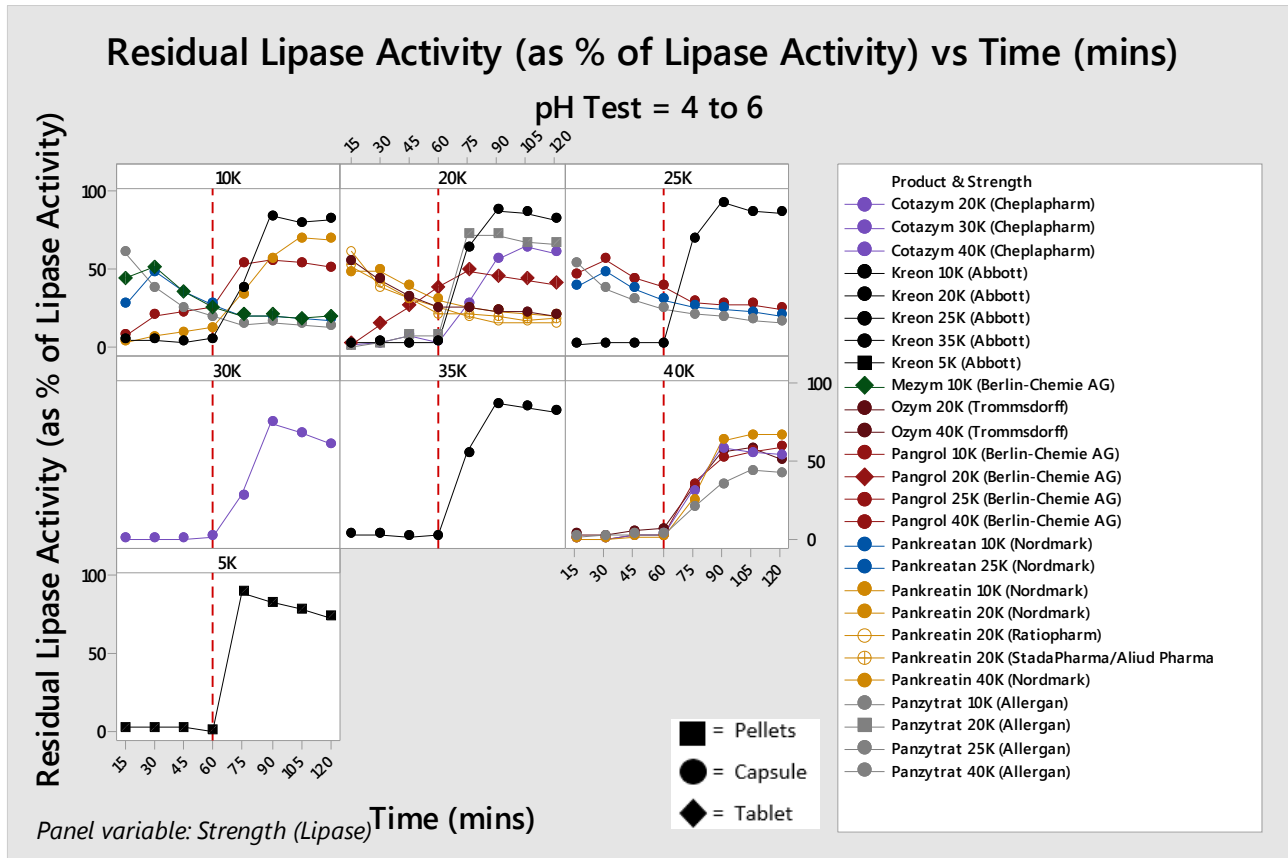

**Figure S8: Residual Lipase Activity (as % of Lipase Activity) vs Time (mins) - pH Test = 4 to 6 Grouped by Individual Strength**

## Part 2 - Enzyme Activity and Enzyme Release Kinetics

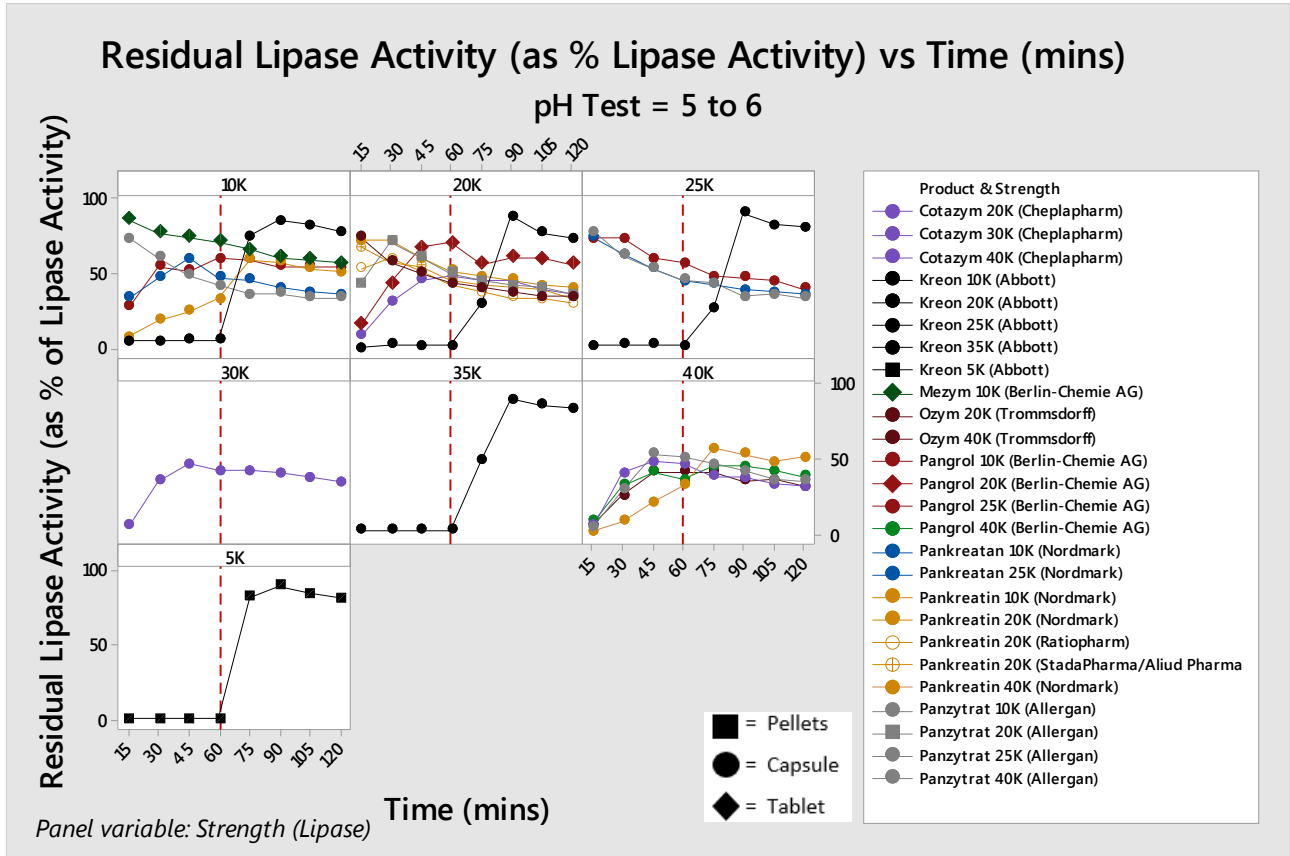

**Figure S9: Residual Lipase Activity (as % of Lipase Activity) vs Time (mins) - pH Test = 5 to 6 Grouped by Individual Strength**

|                                                             |
|-------------------------------------------------------------|
|                                                             |
|                                                             |
| <b>Part 2 - Enzyme Activity and Enzyme Release Kinetics</b> |

## 7. VERSION HISTORY

---

| Version | Description of Change |
|---------|-----------------------|
| 1.0     | Initial               |

## Part 2 - Enzyme Activity and Enzyme Release Kinetics

### APPENDIX 1 – SAMPLE DETAILS

| Supplier                 | Product    | Strength (Lipase) | Batch  | Expiry | Dosage Form |
|--------------------------|------------|-------------------|--------|--------|-------------|
| Abbott                   | Kreon      | 5K                | 59042  | Nov-22 | Pellets     |
| Abbott                   | Kreon      | 10K               | 58519  | Oct-21 | Capsule     |
| Abbott                   | Kreon      | 20K               | 58845  | Dec-21 | Capsule     |
| Abbott                   | Kreon      | 25K               | 58888  | Jan-22 | Capsule     |
| Abbott                   | Kreon      | 35K               | 59016  | Dec-21 | Capsule     |
| Allergan                 | Panzytrat  | 10K               | 337801 | Jan-21 | Capsule     |
| Allergan                 | Panzytrat  | 20K               | 358001 | Oct-22 | Pellets     |
| Allergan                 | Panzytrat  | 25K               | 413201 | Aug-21 | Capsule     |
| Allergan                 | Panzytrat  | 40K               | 670501 | May-22 | Capsule     |
| Berlin-Chemie AG         | Mezym      | 10K               | 98013  | Mar-22 | Tablet      |
| Berlin-Chemie AG         | Pangrol    | 10K               | 94166E | Nov-21 | Capsule     |
| Berlin-Chemie AG         | Pangrol    | 20K               | 92027A | May-22 | Tablet      |
| Berlin-Chemie AG         | Pangrol    | 25K               | 93255H | Sep-21 | Capsule     |
| Berlin-Chemie AG         | Pangrol    | 40K               | 92019  | Apr-22 | Capsule     |
| Cheplapharm              | Cotazym    | 20K               | 507401 | Apr-21 | Capsule     |
| Cheplapharm              | Cotazym    | 30K               | 507701 | May-21 | Capsule     |
| Cheplapharm              | Cotazym    | 40K               | 659101 | May-21 | Capsule     |
| Nordmark                 | Pankreatin | 10K               | 012501 | Apr-21 | Capsule     |
| Nordmark                 | Pankreatin | 20K               | 319301 | May-21 | Capsule     |
| Nordmark                 | Pankreatin | 40K               | 672401 | Jul-22 | Capsule     |
| Nordmark                 | Pankreatan | 10K               | 321301 | Apr-22 | Capsule     |
| Nordmark                 | Pankreatan | 25K               | 323101 | Jul-22 | Capsule     |
| Ratiopharm               | Pankreatin | 20K               | 321401 | Feb-22 | Capsule     |
| StadaPharma/Aliud Pharma | Pankreatin | 20K               | 92238  | May-22 | Capsule     |
| Trommsdorff              | Ozym       | 20K               | N001   | Dec-21 | Capsule     |
| Trommsdorff              | Ozym       | 40K               | N002   | Feb-22 | Capsule     |

Effective Date: 3/31/2021 4:45:06 AM
